# Supplementary material for: Copper(i)-catalyzed regioselective Ullmann-type coupling of primary carbamates and 5-substituted-1,2,3-triiodobenzenes: facile synthesis of 2,3-diiodinated N-aryl carbamates
Source: Royal Society of Chemistry journal article supplement (doi:10.1039/d1nj01332g), 2021-01-01
Supplement: d1nj01332g1.pdf [file d1nj01332g1.pdf]

***Copper(I)-Catalyzed Regioselective  
Ullmann-Type Coupling of Primary  
Carbamates and 5-Substituted-1,2,3-  
triiodobenzenes:  
Facile Synthesis of 2,3-Diiodinated N-  
Arylcarbamates as Potential  
Antimicrobial Candidates***

*Supporting Information*

## Table of Contents

|                                                                                                                                                                                                          |    |
|----------------------------------------------------------------------------------------------------------------------------------------------------------------------------------------------------------|----|
| Table of Contents .....                                                                                                                                                                                  | 2  |
| 1. <b>Experimental Details and Compound Data</b> .....                                                                                                                                                   | 4  |
| 1.1 <b>General Information</b> .....                                                                                                                                                                     | 4  |
| 1.2 <b>General procedure for 2,3-diiodophenylcarbamate derivatives from 5-substituted-1,2,3-triiodobenzenes via Ullmann-type C-N cross-coupling reaction</b> .....                                       | 4  |
| 1.2.1 <i>Synthesis of methyl (2,3-diiodophenyl)carbamate (5A)</i> .....                                                                                                                                  | 5  |
| 1.2.2 <i>Synthesis of ethyl (2,3-diiodophenyl)carbamate (6A)</i> .....                                                                                                                                   | 5  |
| 1.2.3 <i>Synthesis of N-(2,3-diiodophenyl)-2-phenoxyacetamide (7A)</i> .....                                                                                                                             | 5  |
| 1.2.4 <i>Synthesis of tert-butyl (2,3-diiodophenyl)carbamate (8A)</i> .....                                                                                                                              | 6  |
| 1.2.5 <i>Synthesis of methyl (2,3-diiodo-5-methylphenyl)carbamate (10A)</i> .....                                                                                                                        | 6  |
| 1.2.6 <i>Synthesis of ethyl (2,3-diiodo-5-methylphenyl)carbamate (11A)</i> .....                                                                                                                         | 7  |
| 1.2.7 <i>Synthesis of N-(2,3-diiodo-5-methylphenyl)-2-phenoxyacetamide (12A)</i> .....                                                                                                                   | 7  |
| 1.2.8 <i>Synthesis of tert-butyl (2,3-diiodo-5-methylphenyl)carbamate (13A)</i> .....                                                                                                                    | 7  |
| 1.2.9 <i>Synthesis of ethyl (5-fluoro-2,3-diiodophenyl)carbamate (15A)</i> .....                                                                                                                         | 8  |
| 1.2.10 <i>Synthesis of benzyl (5-fluoro-2,3-diiodophenyl)carbamate (16A)</i> .....                                                                                                                       | 8  |
| 1.2.11 <i>Synthesis of ethyl (5-chloro-2,3-diiodophenyl)carbamate (17A)</i> .....                                                                                                                        | 8  |
| 1.2.12 <i>Synthesis of benzyl (5-chloro-2,3-diiodophenyl)carbamate (18A)</i> .....                                                                                                                       | 9  |
| 1.2.13 <i>Synthesis of ethyl (5-bromo-2,3-diiodophenyl)carbamate (20A)</i> .....                                                                                                                         | 9  |
| 1.2.14 <i>Synthesis of benzyl (5-bromo-2,3-diiodophenyl)carbamate (21A)</i> .....                                                                                                                        | 10 |
| 1.2.15 <i>Synthesis of methyl (2,3-diiodo-5-methoxyphenyl)carbamate (22A)</i> .....                                                                                                                      | 10 |
| 1.2.16 <i>Synthesis of ethyl (2,3-diiodo-5-methoxyphenyl)carbamate (23A)</i> .....                                                                                                                       | 10 |
| 1.2.17 <i>Synthesis of benzyl (2,3-diiodo-5-methoxyphenyl)carbamate (24A)</i> .....                                                                                                                      | 11 |
| 1.2.18 <i>Synthesis of tert-butyl (2,3-diiodo-5-methoxyphenyl)carbamate (26A)</i> .....                                                                                                                  | 11 |
| 1.2.19 <i>Synthesis of methyl 3-((ethoxycarbonyl)amino)-4,5-diiodobenzoate (27A)</i> .....                                                                                                               | 12 |
| 1.2.20 <i>Synthesis of ethyl (3-bromo-2-iodophenyl)carbamate (28A)</i> .....                                                                                                                             | 12 |
| 1.2.21 <i>Synthesis of ethyl (3-chloro-2-iodophenyl)carbamate (29A)</i> .....                                                                                                                            | 12 |
| 1.3 <b>General procedure for Sonogashira cross-coupling reaction of benzyl (5-chloro-2,3-diiodophenyl)carbamate 24A</b> .....                                                                            | 13 |
| 1.3.1 <i>Synthesis of benzyl (5-chloro-3-iodo-2-((4-methoxyphenyl)ethynyl)phenyl)-carbamate (34) and benzyl (5-chloro-2,3-bis((4-methoxyphenyl)ethynyl)phenyl)-carbamate (bis-coupling pdct)</i> .....   | 13 |
| 1.4 <b>General procedure for Suzuki-Miyaura cross-coupling reaction of benzyl (5-chloro-2,3-diiodophenyl)carbamate (24A)</b> .....                                                                       | 14 |
| 1.4.1 <i>Synthesis of benzyl (4-chloro-6-iodo-4'-methoxy-[1,1'-biphenyl]-2-yl)carbamate (35) and benzyl (5'-chloro-4,4''-dimethoxy-[1,1':2',1''-terphenyl]-3'-yl)carbamate (bis-coupling pdct)</i> ..... | 15 |
| 1.5 <b>NMR Spectra for New Compounds</b> .....                                                                                                                                                           | 16 |
| 1.5.1 <sup>1</sup> H-NMR of methyl (2,3-diiodophenyl)carbamate (5A) in CDCl <sub>3</sub> at 25 °C. ....                                                                                                  | 16 |
| 1.5.2 <sup>13</sup> C-NMR of methyl (2,3-diiodophenyl)carbamate (5A) in CDCl <sub>3</sub> at 25 °C. ....                                                                                                 | 17 |
| 1.5.3 <sup>1</sup> H-NMR of ethyl (2,3-diiodophenyl)carbamate (6A) in CDCl <sub>3</sub> at 25 °C. ....                                                                                                   | 18 |
| 1.5.4 <sup>13</sup> C-NMR of ethyl (2,3-diiodophenyl)carbamate (6A) in CDCl <sub>3</sub> at 25 °C. ....                                                                                                  | 19 |
| 1.5.5 <sup>1</sup> H-NMR of N-(2,3-diiodophenyl)-2-phenoxyacetamide (7A) in CDCl <sub>3</sub> at 25 °C. ....                                                                                             | 20 |
| 1.5.6 <sup>13</sup> C-NMR of N-(2,3-diiodophenyl)-2-phenoxyacetamide (7A) in CDCl <sub>3</sub> at 25 °C. ....                                                                                            | 21 |
| 1.5.7 <sup>1</sup> H-NMR of tert-butyl (2,3-diiodophenyl)carbamate (8A) in CDCl <sub>3</sub> at 25 °C.....                                                                                               | 22 |
| 1.5.8 <sup>13</sup> C-NMR of tert-butyl (2,3-diiodophenyl)carbamate (8A) in CDCl <sub>3</sub> at 25 °C.....                                                                                              | 23 |
| 1.5.9 <sup>1</sup> H-NMR of (2,3-diiodo-5-methylphenyl)carbamate (12A) in CDCl <sub>3</sub> at 25 °C.....                                                                                                | 24 |
| 1.5.10 <sup>13</sup> C-NMR of (2,3-diiodo-5-methylphenyl)carbamate (10A) in CDCl <sub>3</sub> at 25 °C.....                                                                                              | 25 |
| 1.5.11 <sup>1</sup> H-NMR of ethyl (2,3-diiodo-5-methylphenyl)carbamate (11A) in CDCl <sub>3</sub> at 25 °C.....                                                                                         | 26 |
| 1.5.12 <sup>13</sup> C-NMR of ethyl (2,3-diiodo-5-methylphenyl)carbamate (11A) in CDCl <sub>3</sub> at 25 °C.....                                                                                        | 27 |
| 1.5.13 <sup>1</sup> H-NMR of benzyl (2,3-diiodo-5-methylphenyl)carbamate (12A) in CDCl <sub>3</sub> at 25 °C.....                                                                                        | 28 |
| 1.5.14 <sup>13</sup> C-NMR of benzyl (2,3-diiodo-5-methylphenyl)carbamate (12A) in CDCl <sub>3</sub> at 25 °C.....                                                                                       | 29 |

|            |                                                                                                                                               |           |
|------------|-----------------------------------------------------------------------------------------------------------------------------------------------|-----------|
| 1.5.15     | <sup>1</sup> H-NMR of tert-butyl (2,3-diiodo-5-methylphenyl)carbamate ( <b>13A</b> ) in CDCl <sub>3</sub> at 25 °C.....                       | 30        |
| 1.5.16     | <sup>13</sup> C-NMR of tert-butyl (2,3-diiodo-5-methylphenyl)carbamate ( <b>13A</b> ) in CDCl <sub>3</sub> at 25 °C.....                      | 31        |
| 1.5.17     | <sup>1</sup> H-NMR of ethyl (5-fluoro-2,3-diiodophenyl)carbamate ( <b>15A</b> ) in CDCl <sub>3</sub> at 25 °C.....                            | 32        |
| 1.5.18     | <sup>13</sup> C-NMR of ethyl (5-fluoro-2,3-diiodophenyl)carbamate ( <b>15A</b> ) in CDCl <sub>3</sub> at 25 °C.....                           | 33        |
| 1.5.19     | <sup>1</sup> H-NMR of benzyl (5-fluoro-2,3-diiodophenyl)carbamate ( <b>16A</b> ) in CDCl <sub>3</sub> at 25 °C.....                           | 34        |
| 1.5.20     | <sup>13</sup> C-NMR of benzyl (5-fluoro-2,3-diiodophenyl)carbamate ( <b>16A</b> ) in CDCl <sub>3</sub> at 25 °C.....                          | 35        |
| 1.5.21     | <sup>1</sup> H-NMR of ethyl (5-chloro-2,3-diiodophenyl)carbamate ( <b>17A</b> ) in CDCl <sub>3</sub> at 25 °C.....                            | 36        |
| 1.5.22     | <sup>13</sup> C-NMR of ethyl (5-chloro-2,3-diiodophenyl)carbamate ( <b>17A</b> ) in CDCl <sub>3</sub> at 25 °C.....                           | 37        |
| 1.5.23     | <sup>1</sup> H-NMR of benzyl (5-chloro-2,3-diiodophenyl)carbamate ( <b>18A</b> ) in CDCl <sub>3</sub> at 25 °C.....                           | 38        |
| 1.5.24     | <sup>13</sup> C-NMR of benzyl (5-chloro-2,3-diiodophenyl)carbamate ( <b>18A</b> ) in CDCl <sub>3</sub> at 25 °C.....                          | 39        |
| 1.5.25     | <sup>1</sup> H-NMR of ethyl (5-bromo-2,3-diiodophenyl)carbamate ( <b>20A</b> ) in CDCl <sub>3</sub> at 25 °C.....                             | 40        |
| 1.5.26     | <sup>13</sup> C-NMR of ethyl (5-bromo-2,3-diiodophenyl)carbamate ( <b>20A</b> ) in CDCl <sub>3</sub> at 25 °C.....                            | 41        |
| 1.5.27     | <sup>1</sup> H-NMR of benzyl (5-bromo-2,3-diiodophenyl)carbamate ( <b>21A</b> ) in CDCl <sub>3</sub> at 25 °C.....                            | 42        |
| 1.5.28     | <sup>13</sup> C-NMR of benzyl (5-bromo-2,3-diiodophenyl)carbamate ( <b>21A</b> ) in CDCl <sub>3</sub> at 25 °C.....                           | 43        |
| 1.5.29     | <sup>1</sup> H-NMR of methyl (2,3-diiodo-5-methoxyphenyl)carbamate ( <b>22A</b> ) in CDCl <sub>3</sub> at 25 °C.....                          | 44        |
| 1.5.30     | <sup>13</sup> C-NMR of methyl (2,3-diiodo-5-methoxyphenyl)carbamate ( <b>22A</b> ) in CDCl <sub>3</sub> at 25 °C.....                         | 45        |
| 1.5.31     | <sup>1</sup> H-NMR of ethyl (2,3-diiodo-5-methoxyphenyl)carbamate ( <b>23A</b> ) in CDCl <sub>3</sub> at 25 °C.....                           | 46        |
| 1.5.32     | <sup>13</sup> C-NMR of ethyl (2,3-diiodo-5-methoxyphenyl)carbamate ( <b>23A</b> ) in CDCl <sub>3</sub> at 25 °C.....                          | 47        |
| 1.5.33     | <sup>1</sup> H-NMR of benzyl (2,3-diiodo-5-methoxyphenyl)carbamate ( <b>24A</b> ) in CDCl <sub>3</sub> at 25 °C.....                          | 48        |
| 1.5.34     | <sup>13</sup> C-NMR of benzyl (2,3-diiodo-5-methoxyphenyl)carbamate ( <b>24A</b> ) in CDCl <sub>3</sub> at 25 °C.....                         | 49        |
| 1.5.35     | <sup>1</sup> H-NMR of tert-butyl (2,3-diiodo-5-methoxyphenyl)carbamate ( <b>26A</b> ) in CDCl <sub>3</sub> at 25 °C.....                      | 50        |
| 1.5.36     | <sup>13</sup> C-NMR of tert-butyl (2,3-diiodo-5-methoxyphenyl)carbamate ( <b>26A</b> ) in CDCl <sub>3</sub> at 25 °C.....                     | 51        |
| 1.5.37     | <sup>1</sup> H-NMR of methyl 3-((ethoxycarbonyl)amino)-4,5-diiodobenzoate ( <b>27A</b> ) in CDCl <sub>3</sub> at 25 °C.....                   | 52        |
| 1.5.38     | <sup>13</sup> C-NMR of methyl 3-((ethoxycarbonyl)amino)-4,5-diiodobenzoate ( <b>27A</b> ) in CDCl <sub>3</sub> at 25 °C.....                  | 53        |
| 1.5.39     | <sup>1</sup> H-NMR of ethyl (3-bromo-2-iodophenyl)carbamate ( <b>28A</b> ) in CDCl <sub>3</sub> at 25 °C.....                                 | 54        |
| 1.5.40     | <sup>13</sup> C-NMR of ethyl (3-bromo-2-iodophenyl)carbamate ( <b>28A</b> ) in CDCl <sub>3</sub> at 25 °C.....                                | 55        |
| 1.5.41     | <sup>1</sup> H-NMR of ethyl (3-chloro-2-iodophenyl)carbamate ( <b>29A</b> ) in CDCl <sub>3</sub> at 25 °C.....                                | 56        |
| 1.5.42     | <sup>13</sup> C-NMR of ethyl (3-chloro-2-iodophenyl)carbamate ( <b>29A</b> ) in CDCl <sub>3</sub> at 25 °C.....                               | 57        |
| 1.5.43     | <sup>1</sup> H-NMR of benzyl (5-chloro-3-iodo-2-((4-methoxyphenyl)ethynyl)phenyl)-carbamate ( <b>34</b> ) in CDCl <sub>3</sub> at 25 °C.....  | 58        |
| 1.5.44     | <sup>13</sup> C-NMR of benzyl (5-chloro-3-iodo-2-((4-methoxyphenyl)ethynyl)phenyl)-carbamate ( <b>34</b> ) in CDCl <sub>3</sub> at 25 °C..... | 59        |
| 1.5.45     | <sup>1</sup> H-NMR of benzyl (5-chloro-2,3-bis((4-methoxyphenyl)ethynyl)phenyl)-carbamate in CDCl <sub>3</sub> at 25 °C....                   | 60        |
| 1.5.46     | <sup>13</sup> C-NMR of benzyl (5-chloro-2,3-bis((4-methoxyphenyl)ethynyl)phenyl)-carbamate in CDCl <sub>3</sub> at 25 °C....                  | 61        |
| 1.5.47     | <sup>1</sup> H-NMR of benzyl (4-chloro-6-iodo-4'-methoxy-[1,1'-biphenyl]-2-yl)carbamate ( <b>35</b> ) in CDCl <sub>3</sub> at 25 °C....       | 62        |
| 1.5.48     | <sup>13</sup> C-NMR of benzyl (4-chloro-6-iodo-4'-methoxy-[1,1'-biphenyl]-2-yl)carbamate ( <b>35</b> ) in CDCl <sub>3</sub> at 25 °C....      | 63        |
| 1.5.49     | <sup>1</sup> H-NMR of benzyl (5'-chloro-4,4''-dimethoxy-[1,1':2',1''-terphenyl]-3'-yl)carbamate in CDCl <sub>3</sub> at 25 °C. .              | 64        |
| 1.5.50     | <sup>13</sup> C-NMR of benzyl (5'-chloro-4,4''-dimethoxy-[1,1':2',1''-terphenyl]-3'-yl)carbamate in CDCl <sub>3</sub> at 25 °C....            | 65        |
| <b>1.6</b> | <b>X-ray of new compounds.....</b>                                                                                                            | <b>66</b> |
| 1.6.1      | X-ray data of ethyl (2,3-diiodophenyl)carbamate ( <b>6A</b> ) .....                                                                           | 66        |
| 1.6.2      | X-ray data of ethyl (2,3-diiodo-5-methoxyphenyl)carbamate ( <b>23A</b> ) .....                                                                | 76        |

## 1. Experimental Details and Compound Data.

### 1.1 General Information

All commercial reagents and chromatography solvents were used as obtained unless otherwise stated. Ethanol, toluene, ethyl acetate, hexanes, anhydrous sodium sulfate ( $\text{Na}_2\text{SO}_4$ , BDH) were used as received. Anhydrous solvents were distilled over appropriate drying agents prior to use. Analytical thin layer chromatography (TLC) was performed on Merck silica gel 60 F<sub>254</sub>. Merck Silica gel 60 (0.063 - 0.2 mm) was used for column chromatography. Visualization of TLC was accomplished with UV light (254 nm). NMR spectra were recorded on a Bruker-Avance 400 MHz spectrometer. The residual solvent protons ( $^1\text{H}$ ) or the solvent carbon ( $^{13}\text{C}$ ) were used as internal standards.  $^1\text{H}$ -NMR data are presented as follows: chemical shift in ppm ( $\delta$ ) downfield from trimethylsilane (multiplicity, integration, coupling constant). The following abbreviations are used in reporting NMR data: s, singlet; bs, broad singlet; d, doublet; t, triplet; q, quartet; dq, doublet of quartets; dd, doublet of doublets; m, multiplet. High resolution mass spectra were recorded using Chemical Ionization (CI) and Electrospray ionization (ESI) techniques.

### 1.2 General procedure for 2,3-diiodophenylcarbamate derivatives from 5-substituted-1,2,3-triiodobenzenes *via* Ullmann-type C-N cross-coupling reaction

In a flame-dried sealed tube, 1,2,3-triiodoarene (0.66 mmol), primary carbamate (0.79 mmol, 1.2 equiv.), copper iodide (10-mol%), DMEDA (20-mol %), potassium carbonate (4.0 equiv.) and 6.6 mL toluene (0.1M) were added under argon. The mixture was stirred at 110 °C for 12 h. The reaction was cooled down to room temperature and then



50 mL EtOAc was added. The mixture was filtrated over a pad of Celite 545<sup>®</sup>. Organic layers were combined, dried over anhydrous Na<sub>2</sub>SO<sub>4</sub>, filtered and evaporated under reduced pressure. The crude product was purified by flash chromatography (5% EtOAc/hexane) to yield the pure desired product.

### 1.2.1 Synthesis of methyl (2,3-diiodophenyl)carbamate (5A)

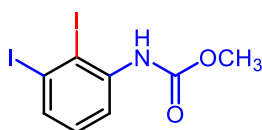

The title compound was prepared using the general procedure and isolated as white solid (**72%** yields). **M.p:** 125-126 °C. **IR** (cast film, cm<sup>-1</sup>) 3324, 3007, 2994, 1701, 1624, 1251, 1027, 861.

**$\delta_{\text{H}}$**  (400MHz, CDCl<sub>3</sub>)  $\delta$ : 8.00 (d, 1H,  $J = 8.1$  Hz), 7.62 (dd, 1H,  $J^1 = 1.2$  Hz,  $J^2 = 7.8$  Hz), 7.16 (bs, 1H), 7.09 (dd, 1H,  $J^1 = 8.3$  Hz,  $J^2 = 8.0$  Hz), 3.80 (s, 3H).  **$\delta_{\text{C}}$**  (100 MHz, CDCl<sub>3</sub>)  $\delta$ : 154.2, 140.4, 134.6, 130.5, 119.1, 108.7, 103.5, 52.8. **HRMS** (ESI)  $m/z$  for C<sub>8</sub>H<sub>8</sub>I<sub>2</sub>NO<sub>2</sub> [M+H]<sup>+</sup>: calcd. 403.8644; found, 403.8637.

### 1.2.2 Synthesis of ethyl (2,3-diiodophenyl)carbamate (6A)

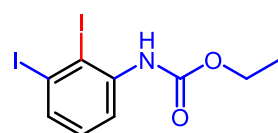

The title compound was prepared using the general procedure and isolated as white solid (**67%** yields). **M.p:** 116-118 °C. **IR** (cast film, cm<sup>-1</sup>) 3327, 3004, 2995, 1697, 1627, 1263, 1042, 872.

**$\delta_{\text{H}}$**  (400 MHz, CDCl<sub>3</sub>)  $\delta$ : 8.01 (d, 1H,  $J = 8.2$  Hz), 7.62 (d, 1H,  $J = 7.7$  Hz), 7.13 (bs, 1H), 7.08 (t, 1H,  $J = 8.04$  Hz), 4.24 (q, 2H,  $J = 7.1$  Hz), 1.34 (t, 3H,  $J = 7.1$  Hz).  **$\delta_{\text{C}}$**  (100 MHz, CDCl<sub>3</sub>)  $\delta$ : 153.7, 140.6, 134.5, 130.5, 119.1, 108.7, 103.4, 61.9, 14.6. **HRMS** (ESI)  $m/z$  for C<sub>9</sub>H<sub>10</sub>I<sub>2</sub>NO<sub>2</sub> [M+H]<sup>+</sup>: calcd. Exact 417.8801; found, 417.8798.

### 1.2.3 Synthesis of N-(2,3-diiodophenyl)-2-phenoxyacetamide (7A)

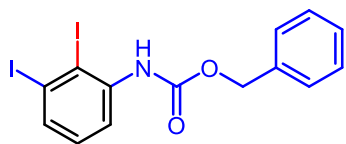

The title compound was prepared using the general procedure and isolated as white solid (**77%** yields). **M.p:** 131-132 °C. **IR** (cast film,  $\text{cm}^{-1}$ ) 3361, 3014, 1689, 1614,

1527, 1271, 1107, 943, 764.  $\delta_{\text{H}}$  (400 MHz,  $\text{CDCl}_3$ )  $\delta$ : 8.03 (d, 1H,  $J = 8.2$  Hz), 7.63 (d, 1H,  $J = 7.8$  Hz), 7.34-7.44 (m, 5H), 7.23 (bs, 1H), 7.10 (t, 1H,  $J^1 = 8.0$  Hz), 5.22 (s, 2H).  $\delta_{\text{C}}$  (100 MHz,  $\text{CDCl}_3$ )  $\delta$ : 153.6, 140.4, 135.9, 134.7, 130.5, 128.8, 128.7, 128.6, 119.2, 108.8, 103.6, 67.6. **HRMS** (ESI)  $m/z$  for  $\text{C}_{14}\text{H}_{12}\text{I}_2\text{NO}_2$   $[\text{M}+\text{H}]^+$ : calcd. Exact 479.8957; found, 479.8951.

#### 1.2.4 Synthesis of tert-butyl (2,3-diiodophenyl)carbamate (8A)

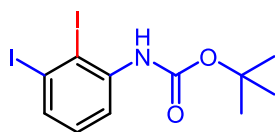

The title compound was prepared using the general procedure and isolated as colorless oil (**71%** yields). **IR** (cast film,  $\text{cm}^{-1}$ )

3351, 3012, 2994, 1694, 1644, 1276, 1043, 869.  $\delta_{\text{H}}$  (400 MHz,  $\text{CDCl}_3$ )  $\delta$ : 8.01 (d, 1H,  $J = 7.9$  Hz), 7.59 (d, 1H,  $J = 7.8$  Hz), 7.05 (dd, 1H,  $J = 7.9$  Hz,  $J = 8.2$  Hz), 7.02 (bs, 1H), 1.53 (s, 9H).  $\delta_{\text{C}}$  (100 MHz,  $\text{CDCl}_3$ )  $\delta$ : 152.8, 134.2, 130.4, 119.1, 108.7, 103.4, 81.5, 28.4. **HRMS** (ESI)  $m/z$  for  $\text{C}_{11}\text{H}_{14}\text{I}_2\text{NO}_2$   $[\text{M}+\text{H}]^+$ : calcd. 445.9114; found, 445.9106.

#### 1.2.5 Synthesis of methyl (2,3-diiodo-5-methylphenyl)carbamate (10A)

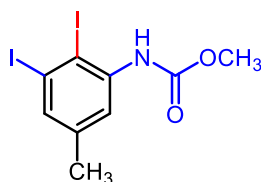

The title compound was prepared using the general procedure and isolated as white solid (**84%** yields). **M.p:** 123-124 °C. **IR**

(cast film,  $\text{cm}^{-1}$ ) 3341, 3007, 2992, 1692, 1627, 1273, 1136, 938, 626.  $\delta_{\text{H}}$  (400MHz,  $\text{CDCl}_3$ )  $\delta$ : 7.83 (s, 1H), 7.49 (s, 1H), 7.10 (bs, 1H), 3.79 (s, 3H), 2.26 (s, 3H).  $\delta_{\text{C}}$  (100 MHz,  $\text{CDCl}_3$ )  $\delta$ : 154.2, 141.1, 139.8, 135.5, 120.2, 108.5, 99.5, 52.8, 21.0.

**HRMS** (ESI)  $m/z$  for  $\text{C}_9\text{H}_{10}\text{I}_2\text{NO}_2$   $[\text{M}+\text{H}]^+$ : calcd. 417.8801; found, 417.8798.

### 1.2.6 Synthesis of ethyl (2,3-diiodo-5-methylphenyl)carbamate (11A)

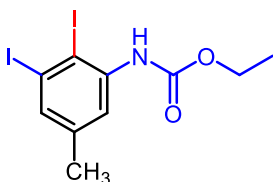

The title compound was prepared using the general procedure and isolated as white solid (**78%** yields). **M.p:** 101-102 °C. **IR** (cast film,  $\text{cm}^{-1}$ ) 3361, 3002, 2988, 1701, 1637, 1267, 1109, 869.  $\delta_{\text{H}}$  (400 MHz,  $\text{CDCl}_3$ )  $\delta$ : 7.84 (s, 1H), 7.48 (d, 1H,  $J = 0.9$  Hz), 7.07 (bs, 1H), 4.23 (q, 2H,  $J = 7.1$  Hz), 1.33 (t, 3H,  $J = 7.1$  Hz).  $\delta_{\text{C}}$  (100 MHz,  $\text{CDCl}_3$ )  $\delta$ : 153.8, 141.0, 140.0, 135.4, 120.1, 108.5, 99.4, 61.8, 21.0, 14.6. **HRMS** (ESI)  $m/z$  for  $\text{C}_{10}\text{H}_{12}\text{I}_2\text{NO}_2$   $[\text{M}+\text{H}]^+$ : calcd. Exact 431.8957; found, 431.8955.

### 1.2.7 Synthesis of *N*-(2,3-diiodo-5-methylphenyl)-2-phenoxyacetamide (12A)

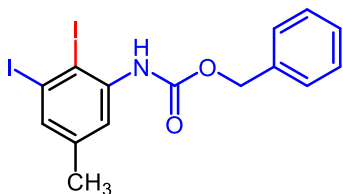

The title compound was prepared using the general procedure and isolated as white solid (**77%** yields). **M.p:** 136-137 °C. **IR** (cast film,  $\text{cm}^{-1}$ ) 3348, 3003, 2997, 1698, 1634, 1253, 1109, 933, 684.  $\delta_{\text{H}}$  (400 MHz,  $\text{CDCl}_3$ )  $\delta$ : 7.86 (s, 1H), 7.50 (s, 1H), 7.36-7.51 (m, 5H), 7.17 (bs, 1H), 5.22 (s, 2H), 2.26 (s, 3H).  $\delta_{\text{C}}$  (100 MHz,  $\text{CDCl}_3$ )  $\delta$ : 153.6, 141.0, 139.8, 135.9, 135.5, 128.8, 128.6, 128.5, 120.2, 108.5, 99.5, 67.5, 21.0. **HRMS** (ESI)  $m/z$  for  $\text{C}_{15}\text{H}_{14}\text{I}_2\text{NO}_2$   $[\text{M}+\text{H}]^+$ : calcd. Exact 493.9114; found, 493.9110.

### 1.2.8 Synthesis of *tert*-butyl (2,3-diiodo-5-methylphenyl)carbamate (13A)

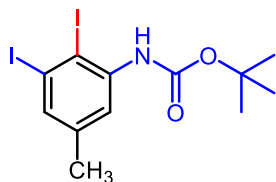

The title compound was prepared using the general procedure and isolated as colorless oil (**68%** yields). **IR** (cast film,  $\text{cm}^{-1}$ ) 3348, 3008, 2989, 1695, 1637, 1286, 1112, 1031, 827.  $\delta_{\text{H}}$  (400 MHz,  $\text{CDCl}_3$ )  $\delta$ : 7.85 (s, 1H), 7.47 (s, 1H), 6.99 (bs, 1H), 2.25 (s, 3H), 1.53 (s, 9H).  $\delta_{\text{C}}$  (100

MHz, CDCl<sub>3</sub>)  $\delta$ : 152.9, 140.9, 140.4, 135.1, 119.9, 108.4, 99.3, 81.4, 28.5, 21.0. **HRMS** (ESI)  $m/z$  for C<sub>12</sub>H<sub>16</sub>I<sub>2</sub>NO<sub>2</sub> [M+H]<sup>+</sup>: calcd. 459.9270; found, 459.9262.

### 1.2.9 Synthesis of ethyl (5-fluoro-2,3-diiodophenyl)carbamate (15A)

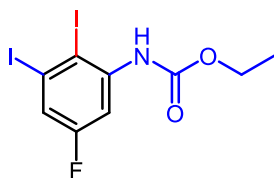

The title compound was prepared using the general procedure and isolated as white solid (**96%** yields). **M.p.**: 93-94 °C. **IR** (cast film, cm<sup>-1</sup>) 3376, 3014, 3001, 1689, 1612, 1283, 1032, 897, 784.

$\delta_H$  (400 MHz, CDCl<sub>3</sub>)  $\delta$ : 7.96 (dd, 1H,  $J^1 = 2.7$  Hz,  $J^2 = 10.9$  Hz), 7.40 (dd, 1H,  $J^1 = 2.8$  Hz,  $J^2 = 7.4$  Hz), 7.24 (bs, 1H), 4.25 (q, 2H,  $J = 7.1$  Hz), 1.33 (t, 3H,  $J = 7.1$  Hz).  $\delta_C$  (100 MHz, CDCl<sub>3</sub>)  $\delta$ : 164.3, 161.8, 153.4, 141.4, 141.3, 121.6, 121.3, 108.1, 108.0, 106.8, 106.5, 96.5, 96.4, 62.1, 14.6. **HRMS** (ESI)  $m/z$  for C<sub>9</sub>H<sub>9</sub>FI<sub>2</sub>NO<sub>2</sub> [M+H]<sup>+</sup>: calcd. Exact 435.8707; found, 435.8701.

### 1.2.10 Synthesis of benzyl (5-fluoro-2,3-diiodophenyl)carbamate (16A)

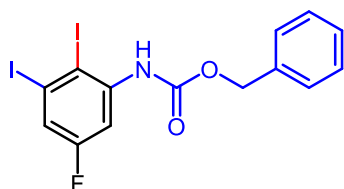

The title compound was prepared using the general procedure and isolated as white solid (**90%** yields). **M.p.**: 133-134°C. **IR** (cast film, cm<sup>-1</sup>) 3375, 3010, 2997, 1692,

1607, 1238, 1097, 1008, 914, 768.  $\delta_H$  (400 MHz, CDCl<sub>3</sub>)  $\delta$ : 8.01 (dd, 1H,  $J^1 = 1.8$  Hz,  $J^2 = 10.9$  Hz), 7.36-7.43 (m, 6H), 7.32 (bs, 1H), 5.23 (s, 2H).  $\delta_C$  (100 MHz, CDCl<sub>3</sub>)  $\delta$ : 164.3, 161.8, 153.2, 141.2, 141.1, 135.6, 128.9, 128.8, 128.7, 121.8, 121.5, 108.2, 108.1, 106.9, 106.6, 96.6, 96.5, 67.8. **HRMS** (ESI)  $m/z$  for C<sub>14</sub>H<sub>11</sub>FI<sub>2</sub>NO<sub>2</sub> [M+H]<sup>+</sup>: calcd. Exact 497.8863; found, 497.8861.

### 1.2.11 Synthesis of ethyl (5-chloro-2,3-diiodophenyl)carbamate (17A)

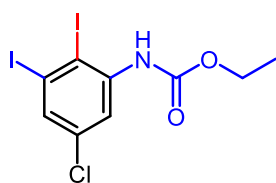

The title compound was prepared using the general procedure and isolated as white solid (**78%** yields). **M.p:** 91-93 °C. **IR** (cast film,  $\text{cm}^{-1}$ ) 3347, 3016, 2984, 1688, 1627, 1283, 1009, 822, 631.

$\delta_{\text{H}}$  (400 MHz,  $\text{CDCl}_3$ )  $\delta$ : 8.14 (d, 1H,  $J = 1.8$  Hz), 7.62 (d, 1H,  $J = 2.0$  Hz), 7.18 (bs, 1H), 4.25 (q, 2H,  $J = 7.2$  Hz), 1.34 (t, 3H,  $J = 7.2$  Hz).  $\delta_{\text{C}}$  (100 MHz,  $\text{CDCl}_3$ )  $\delta$ : 153.4, 140.9, 136.3, 133.6, 118.9, 108.8, 100.5, 62.2, 14.6. **HRMS** (ESI)  $m/z$  for  $\text{C}_9\text{H}_9\text{ClI}_2\text{NO}_2$   $[\text{M}+\text{H}]^+$ : calcd. Exact 451.8411; found, 451.8407.

### 1.2.12 Synthesis of benzyl (5-chloro-2,3-diiodophenyl)carbamate (18A)

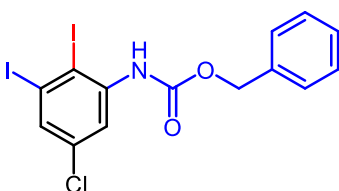

The title compound was prepared using the general procedure and isolated as white solid (**63%** yields). **M.p:** 133-134 °C. **IR** (cast film,  $\text{cm}^{-1}$ ) 3358, 3002, 2984, 1699,

1624, 1284, 1027, 912, 637.  $\delta_{\text{H}}$  (400 MHz,  $\text{CDCl}_3$ )  $\delta$ : 8.16 (d, 1H,  $J = 2.1$  Hz), 7.63 (d, 1H,  $J = 2.3$  Hz), 7.36-7.42 (m, 5H), 5.22 (s, 2H).  $\delta_{\text{C}}$  (100 MHz,  $\text{CDCl}_3$ )  $\delta$ : 153.3, 140.8, 136.3, 135.6, 133.7, 128.9, 128.8, 128.7, 118.9, 108.8, 100.6, 67.9. **HRMS** (ESI)  $m/z$  for  $\text{C}_{14}\text{H}_{11}\text{ClI}_2\text{NO}_2$   $[\text{M}+\text{H}]^+$ : calcd. Exact 513.8568; found, 513.8564.

### 1.2.13 Synthesis of ethyl (5-bromo-2,3-diiodophenyl)carbamate (20A)

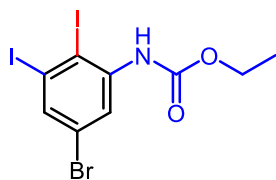

The title compound was prepared using the general procedure and isolated as white solid (**69%** yields). **M.p:** 119-120 °C. **IR** (cast film,  $\text{cm}^{-1}$ ) 3359, 3012, 2993, 1689, 1644, 1264, 1057, 961, 762.  $\delta_{\text{H}}$  (400 MHz,  $\text{CDCl}_3$ )  $\delta$ : 8.27 (d, 1H,  $J = 1.9$  Hz), 7.76 (d, 1H,  $J$

= 2.1 Hz), 7.16 (bs, 1H), 4.25 (q, 2H,  $J = 7.1$  Hz), 1.33 (t, 3H,  $J = 7.1$  Hz).  $\delta_c$  (100 MHz,  $\text{CDCl}_3$ )  $\delta$ : 153.4, 141.2, 136.2, 124.1, 121.7, 109.2, 101.4, 62.2, 14.6. **HRMS** (ESI)  $m/z$  for  $\text{C}_9\text{H}_9\text{BrI}_2\text{NO}_2$   $[\text{M}+\text{H}]^+$ : calcd. Exact 495.7906; found, 495.7898.

#### 1.2.14 Synthesis of benzyl (5-bromo-2,3-diiodophenyl)carbamate (21A)

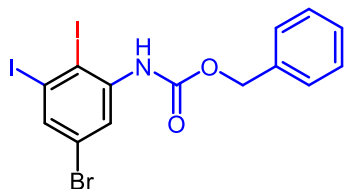

The title compound was prepared using the general procedure and isolated as white solid (75% yields). **M.p**: 145-146 °C. **IR** (cast film,  $\text{cm}^{-1}$ ) 3352, 3019, 2987, 1685, 1598, 1239, 962, 664.  $\delta_H$  (400 MHz,  $\text{CDCl}_3$ )  $\delta$ : 8.28 (s, 1H), 7.77 (d, 1H,  $J = 1.6$  Hz), 7.26-7.44 (m, 5H), 7.24 (bs, 1H), 5.22 (s, 2H).  $\delta_c$  (100 MHz,  $\text{CDCl}_3$ )  $\delta$ : 153.2, 140.9, 136.4, 135.6, 128.9, 128.8, 128.6, 124.1, 121.8, 109.2, 101.5, 67.9. **HRMS** (ESI)  $m/z$  for  $\text{C}_{14}\text{H}_{11}\text{BrI}_2\text{NO}_2$   $[\text{M}+\text{H}]^+$ : calcd. Exact 557.8063; found, 557.8058.

#### 1.2.15 Synthesis of methyl (2,3-diiodo-5-methoxyphenyl)carbamate (22A)

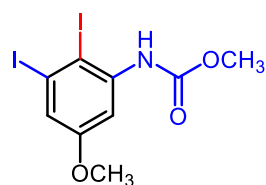

The title compound was prepared using the general procedure and isolated as white solid (77% yields). **M.p**: 125-126 °C. **IR** (cast film,  $\text{cm}^{-1}$ ) 3482, 3082, 3005, 1687, 1628, 1352, 1278, 1083, 843, 622.  $\delta_H$  (400MHz,  $\text{CDCl}_3$ )  $\delta$ : 7.75 (d, 1H,  $J = 2.8$  Hz), 7.25 (d, 1H,  $J = 2.8$  Hz), 7.17 (bs, 1H), 3.80 (s, 3H), 3.78 (s, 3H).  $\delta_c$  (100 MHz,  $\text{CDCl}_3$ )  $\delta$ : 160.9, 154.1, 140.5, 121.3, 108.4, 105.1, 91.9, 55.8, 52.8. **HRMS** (ESI)  $m/z$  for  $\text{C}_9\text{H}_{10}\text{I}_2\text{NO}_3$   $[\text{M}+\text{H}]^+$ : calcd. 433.8750; found, 433.8746

#### 1.2.16 Synthesis of ethyl (2,3-diiodo-5-methoxyphenyl)carbamate (23A)

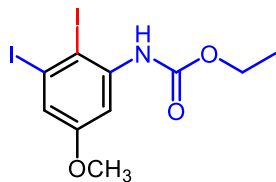

The title compound was prepared using the general procedure and isolated as white solid (**82%** yields). **M.p:** 89-90 °C. **IR** (cast film,  $\text{cm}^{-1}$ ) 3351, 3022, 2981, 1691, 1622, 1299, 1285, 1012, 774.

$\delta_{\text{H}}$  (400 MHz,  $\text{CDCl}_3$ )  $\delta$ : 7.77 (d, 1H,  $J = 2.3$  Hz), 7.25 (d, 1H,  $J = 2.7$  Hz), 7.15 (bs, 1H), 4.24 (q, 2H,  $J = 7.1$  Hz), 3.79 (s, 3H), 1.33 (t, 3H,  $J = 7.1$  Hz).  $\delta_{\text{C}}$  (100 MHz,  $\text{CDCl}_3$ )  $\delta$ : 160.9, 153.7, 140.7, 121.3, 108.4, 105.0, 91.9, 61.9, 55.8, 14.6. **HRMS** (ESI)  $m/z$  for  $\text{C}_{10}\text{H}_{12}\text{I}_2\text{NO}_3$   $[\text{M}+\text{H}]^+$ : calcd. Exact 433.8750; found, 433.8744.

### 1.2.17 Synthesis of benzyl (2,3-diiodo-5-methoxyphenyl)carbamate (24A)

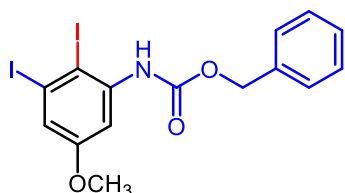

The title compound was prepared using the general procedure and isolated as white solid (**60%** yields). **M.p:**

105-106 °C. **IR** (cast film,  $\text{cm}^{-1}$ ) 3354, 3002, 2978, 1697, 1627, 1277, 1251, 1057, 924, 643.  $\delta_{\text{H}}$  (400 MHz,  $\text{CDCl}_3$ )  $\delta$ :

7.77 (s, 1H), 7.38-7.42 (m, 5H), 7.25 (m, 2H), 5.22 (s, 2H), 3.78 (s, 3H).  $\delta_{\text{C}}$  (100 MHz,  $\text{CDCl}_3$ )  $\delta$ : 160.9, 153.5, 140.5, 135.8, 128.8, 128.7, 128.5, 121.4, 108.4, 105.2, 91.9, 67.6, 55.8. **HRMS** (ESI)  $m/z$  for  $\text{C}_{15}\text{H}_{14}\text{I}_2\text{NO}_3$   $[\text{M}+\text{H}]^+$ : calcd. Exact 509.9063; found, 509.9054.

### 1.2.18 Synthesis of tert-butyl (2,3-diiodo-5-methoxyphenyl)carbamate (26A)

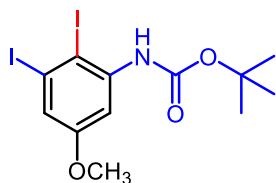

The title compound was prepared using the general procedure and isolated as colorless oil (**76%** yields). **IR** (cast film,  $\text{cm}^{-1}$ )

3359, 3017, 2995, 1675, 1642, 1274, 1245, 1063, 851.  $\delta_{\text{H}}$  (400

MHz,  $\text{CDCl}_3$ )  $\delta$ : 7.76 (d, 1H,  $J = 2.5$  Hz), 7.23 (d, 1H,  $J = 2.7$  Hz), 7.04 (bs, 1H), 3.78 (s, 3H), 1.53 (s, 9H).  $\delta_{\text{C}}$  (100 MHz,  $\text{CDCl}_3$ )  $\delta$ : 160.9, 152.7, 141.1, 120.9, 108.3, 104.9, 91.7, 81.5, 55.8, 28.4. **HRMS** (ESI)  $m/z$  for  $\text{C}_{12}\text{H}_{16}\text{I}_2\text{NO}_3$   $[\text{M}+\text{H}]^+$ : calcd. 475.9220; found, 475.9212.

**1.2.19 Synthesis of methyl 3-((ethoxycarbonyl)amino)-4,5-diiodobenzoate (27A)**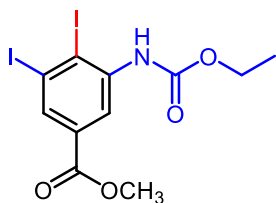

The title compound was prepared using the general procedure and isolated as white solid (**93%** yields). **M.p:** 107-108 °C. **IR** (cast film,  $\text{cm}^{-1}$ ) 3412, 3022, 2985, 1749, 1684, 1638, 1299, 1246, 1003, 889.  $\delta_{\text{H}}$  (400 MHz,  $\text{CDCl}_3$ )  $\delta$ : 8.62 (s, 1H), 8.24 (d, 1H,  $J = 1.8$  Hz), 7.18 (bs, 1H), 4.25 (q, 2H,  $J = 7.1$  Hz), 3.91 (s, 3H), 1.33 (t, 3H,  $J = 7.1$  Hz).  $\delta_{\text{C}}$  (100 MHz,  $\text{CDCl}_3$ )  $\delta$ : 165.4, 153.6, 140.7, 134.9, 132.4, 119.6, 109.2, 108.7, 62.1, 52.7, 14.6. **HRMS** (ESI)  $m/z$  for  $\text{C}_{11}\text{H}_{12}\text{I}_2\text{NO}_4$   $[\text{M}+\text{H}]^+$ : calcd. Exact 475.8856; found 475.8853.

**1.2.20 Synthesis of ethyl (3-bromo-2-iodophenyl)carbamate (28A)**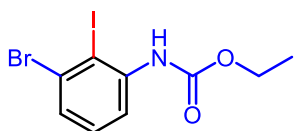

The title compound was prepared using the general procedure and isolated as white solid (**84%** yields). **M.p:** 98-99 °C. **IR** (cast film,  $\text{cm}^{-1}$ ) 3329, 3014, 2997, 1698, 1641, 1263, 1088, 827.  $\delta_{\text{H}}$  (400 MHz,  $\text{CDCl}_3$ )  $\delta$ : 8.00 (d, 1H,  $J = 8.2$  Hz), 7.35 (d, 1H,  $J = 8.0$  Hz), 7.20 (dd, 1H,  $J = 8.1$  Hz,  $J = 8.0$  Hz), 7.16 (bs, 1H), 4.23 (q, 2H,  $J = 7.1$  Hz), 1.33 (t, 3H,  $J = 7.1$  Hz).  $\delta_{\text{C}}$  (100 MHz,  $\text{CDCl}_3$ )  $\delta$ : 153.6, 141.1, 130.4, 130.2, 127.6, 118.3, 97.1, 61.9, 14.6. **HRMS** (ESI)  $m/z$  for  $\text{C}_9\text{H}_{10}\text{BrINO}_2$   $[\text{M}+\text{H}]^+$ : calcd. Exact 369.8940; found, 369.8935.

**1.2.21 Synthesis of ethyl (3-chloro-2-iodophenyl)carbamate (29A)**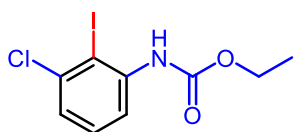

The title compound was prepared using the general procedure and isolated as white solid (**81%** yields). **M.p:** 83-84 °C. **IR** (cast film,  $\text{cm}^{-1}$ ) 3321, 3006, 1701, 1653, 1275, 1097, 849.  $\delta_{\text{H}}$  (400 MHz,  $\text{CDCl}_3$ )  $\delta$ : 7.96 (d, 1H,  $J = 8.2$  Hz), 7.16-7.29 (m, 3H), 4.25 (q, 2H,  $J = 7.1$  Hz), 1.34 (t, 3H,  $J = 7.1$  Hz).  $\delta_{\text{C}}$  (100 MHz,  $\text{CDCl}_3$ )  $\delta$ : 153.5, 140.9, 139.1, 129.9, 124.1, 117.8,



94.0, 61.9, 14.6. **HRMS** (ESI)  $m/z$  for  $C_9H_{10}ClINO_2$   $[M+H]^+$ : calcd. Exact 325.9445; found, 325.9442.

### 1.3 General procedure for Sonogashira cross-coupling reaction of benzyl (5-chloro-2,3-diiodophenyl)carbamate **24<sub>A</sub>**

A flame-dried sealed tube was charged with benzyl (5-chloro-2,3-diiodophenyl)carbamate (0.60 mmol, 1.0 equiv.), 4-methoxyphenylacetylene (1.0 equiv.), copper iodide (20% mol) and potassium carbonate (7.0 equiv.) in 6.0 mL toluene (0.1M) under argon at room temperature for 24 h. The mixture was diluted with ethyl acetate (50 mL) and filtrated over a pad of Celite 545®. Organic layers were combined, dried over anhydrous  $Na_2SO_4$ , filtered and evaporated under reduced pressure. The crude product was purified by flash chromatography (5% EtOAc/hexane) to yield the pure desired product.

#### 1.3.1 Synthesis of benzyl (5-chloro-3-iodo-2-((4-methoxyphenyl)ethynyl)phenyl)-carbamate (**34**)

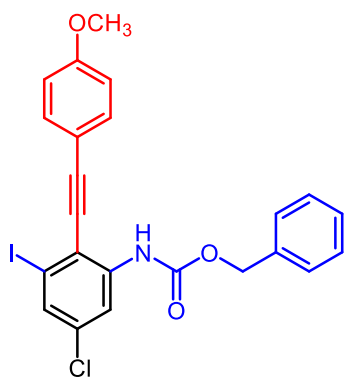

The title compound was prepared using the general procedure and isolated as white solid (**57%** yields). **M.p.**: 107-109 °C. **IR** (cast film,  $cm^{-1}$ ) 3328, 3025, 2215, 1691, 1617, 1264, 1198, 968, 662.  $\delta_H$  (400 MHz,  $CDCl_3$ )  $\delta$ : 8.27 (bs, 1H), 7.32-7.55 (m, 8H), 7.23 (d, 1H,  $J = 2.3$  Hz), 6.89 (d, 2H,  $J = 8.7$  Hz), 5.24 (s, 2H), 3.84 (s, 3H).  $\delta_C$  (100 MHz,

$CDCl_3$ )  $\delta$ : 160.4, 152.8, 136.0, 135.6, 133.5, 133.2, 128.9, 128.8, 128.7, 126.7, 124.9, 121.5, 119.0, 114.5, 114.3, 96.3, 83.9, 67.8, 55.5. **HRMS** (ESI)  $m/z$  for  $C_{23}H_{18}ClINO_3$   $[M+H]^+$ : calcd. Exact 518.0020; found 518.0011.

**Benzyl (5-chloro-2,3-bis((4-methoxyphenyl)ethynyl)phenyl)-carbamate**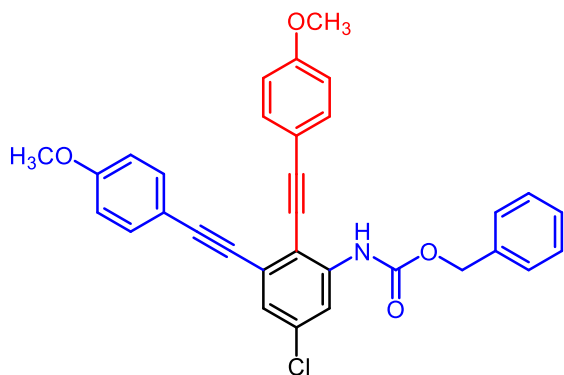

The title compound was isolated as white solid (21% yields). **M.p:** 116-118 °C.  $\delta_{\text{H}}$  (400 MHz,  $\text{CDCl}_3$ )  $\delta$ : 8.24 (bs, 1H), 7.58 (s, 1H), 7.36-7.51 (m, 9H), 7.20 (d, 1H,  $J = 2.0$  Hz), 6.87 (dd, 4H,  $J = 9.2$  Hz,  $J = 8.8$  Hz), 5.25 (s, 2H), 3.84 (s, 3H), 3.82 (s, 3H).  $\delta_{\text{C}}$  (100

MHz,  $\text{CDCl}_3$ )  $\delta$ : 160.4, 160.2, 152.9, 139.7, 135.9, 134.7, 133.4, 133.3, 128.8, 128.6, 128.5, 127.4, 125.7, 117.4, 114.9, 114.5, 114.4, 114.3, 112.7, 101.4, 94.9, 86.1, 81.7, 67.5, 55.5, 55.4. **HRMS** (ESI)  $m/z$  for  $\text{C}_{32}\text{H}_{25}\text{ClNO}_4$   $[\text{M}+\text{H}]^+$ : calcd. Exact 522.1472; found, 522.1463.

#### 1.4 General procedure for Suzuki-Miyaura cross-coupling reaction of benzyl (5-chloro-2,3-diiodophenyl)carbamate (24<sub>A</sub>)

A flame-dried round-bottom flask was charged with benzyl(5-chloro-2,3-diiodophenyl)carbamate (0.6 mmol, 1.0 equiv.), an arylboronic acid (1.0 equiv.), tetrakis(triphenylphosphine)palladium(0) (16 mol-%), 6.0 mL toluene (0.1M), potassium carbonate (2 M solution, 1.4 mL), and ethanol (0.4 mL) under argon. The mixture was heated at 100 °C for 12 h. The reaction mixture was cooled down to room temperature and 50 mL EtOAc was added. The aqueous layer was extracted with ethyl acetate (2 X 50 mL). The combined organic layers were washed with brine, dried with anhyd.  $\text{Na}_2\text{SO}_4$ , filtered, and then concentrated under reduced pressure. The crude residue was purified by flash chromatography (5% EtOAc/hexane) to yield the pure desired product.

### 1.4.1 Synthesis of benzyl (4-chloro-6-iodo-4'-methoxy-[1,1'-biphenyl]-2-yl)carbamate (35)

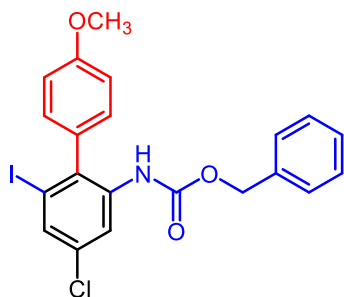

The title compound was prepared using the general procedure and isolated as white solid (**79%** yields). **M.p:** 152-153 °C. **IR** (cast film,  $\text{cm}^{-1}$ ) 3321, 3008, 1694, 1614, 1589, 1286, 1243, 1028, 937, 591.  $\delta_{\text{H}}$  (400 MHz,  $\text{CDCl}_3$ )  $\delta$ : 8.15 (bs, 1H), 7.29-7.45 (m, 6H), 7.17 (d, 2H,  $J = 8.5$  Hz),

7.01 (d, 1H,  $J = 2.3$  Hz), 6.94 (d, 2H,  $J = 8.5$  Hz), 5.24 (s, 2H), 3.86 (s, 3H).  $\delta_{\text{C}}$  (100 MHz,  $\text{CDCl}_3$ )  $\delta$ : 159.6, 153.3, 148.8, 139.7, 136.7, 135.8, 135.2, 130.3, 128.8, 128.7, 128.6, 125.1, 118.4, 113.6, 92.5, 67.7, 55.5. **HRMS** (ESI)  $m/z$  for  $\text{C}_{21}\text{H}_{18}\text{ClINO}_3$   $[\text{M}+\text{H}]^+$ : calcd. Exact 494.0020; found, 494.0015.

### Benzyl (5'-chloro-4,4''-dimethoxy-[1,1':2',1''-terphenyl]-3'-yl)carbamate

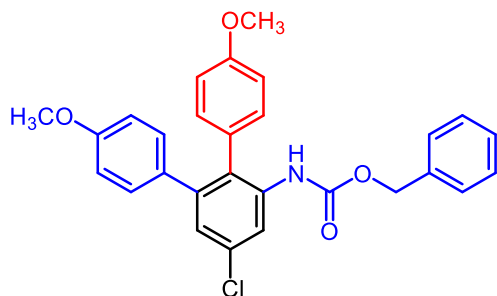

The title compound was isolated as colorless oil (**8%** yields).  $\delta_{\text{H}}$  (400 MHz,  $\text{CDCl}_3$ )  $\delta$ : 8.27 (bs, 1H), 7.35 (m, 5H), 7.10 (d, 1H,  $J = 1.9$  Hz), 6.89-6.96 (m, 4H), 6.81 (d, 2H,  $J = 8.6$  Hz), 6.67 (d, 2H,  $J = 8.6$  Hz), 6.60 (s, 1H), 5.14 (s, 2H), 3.79 (s, 3H),

3.74 (s, 3H).  $\delta_{\text{C}}$  (100 MHz,  $\text{CDCl}_3$ )  $\delta$ : 159.2, 158.5, 153.2, 143.3, 137.1, 136.1, 133.8, 132.8, 132.1, 130.7, 128.8, 128.5, 127.8, 127.3, 124.9, 117.7, 114.7, 113.4, 67.3, 55.3, 55.2 (missing one peak due to overlapping). **HRMS** (ESI)  $m/z$  for  $\text{C}_{28}\text{H}_{25}\text{ClINO}_4$   $[\text{M}+\text{H}]^+$ : calcd. Exact 474.1472; found, 474.1465.

## 1.5 NMR Spectra for New Compound

### 1.5.1 <sup>1</sup>H-NMR of methyl (2,3-diiodophenyl)carbamate (5A) in CDCl<sub>3</sub> at 25 °C.

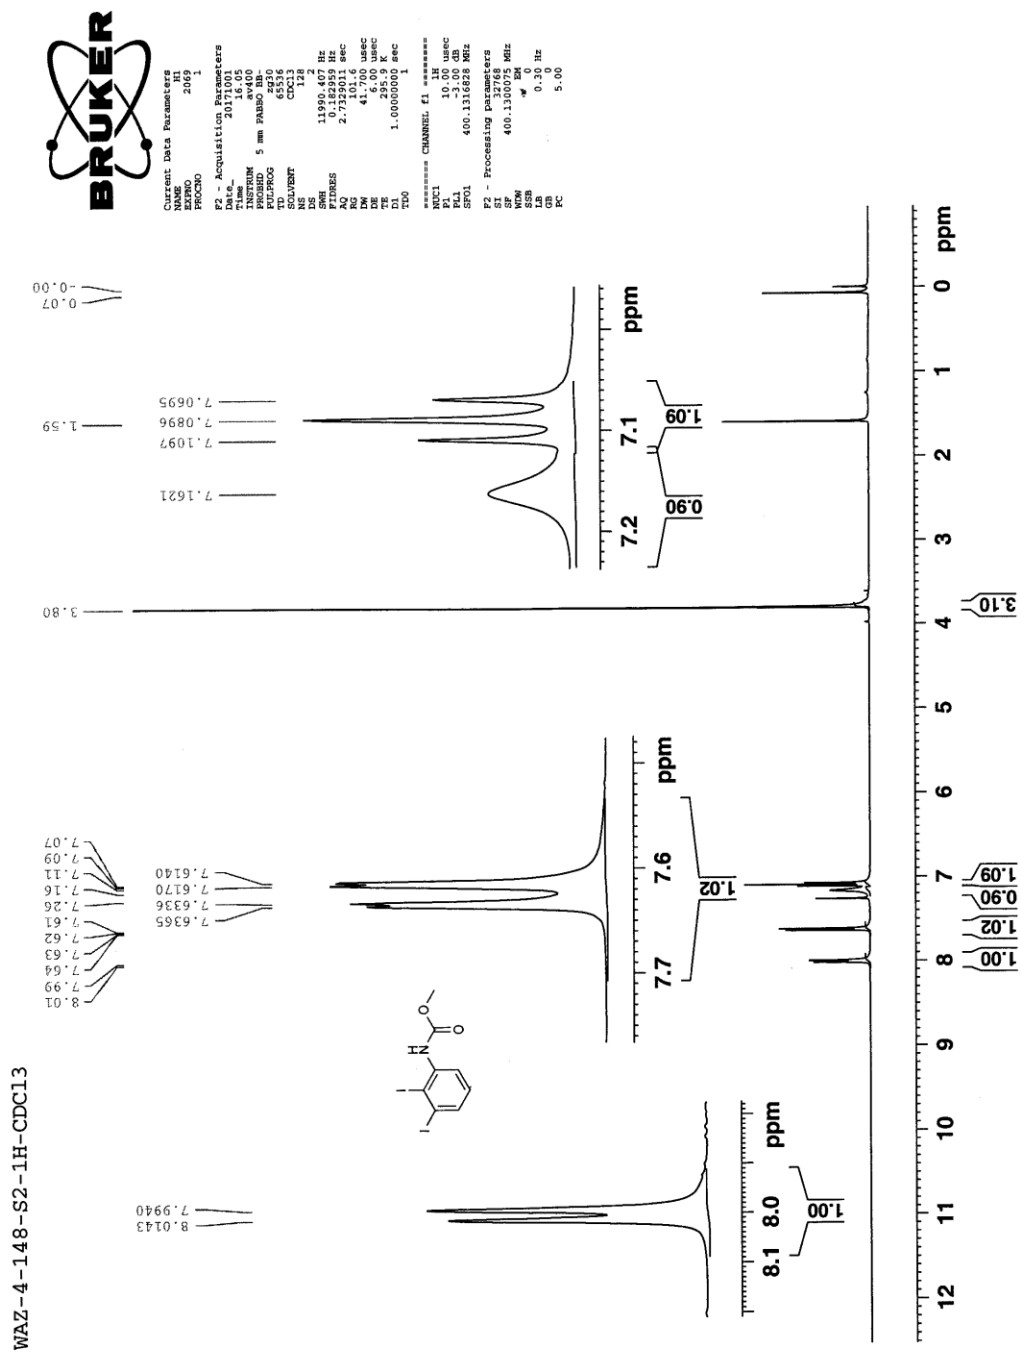

1.5.2  $^{13}\text{C}$ -NMR of methyl (2,3-diiodophenyl)carbamate (5A) in  $\text{CDCl}_3$  at 25 °C.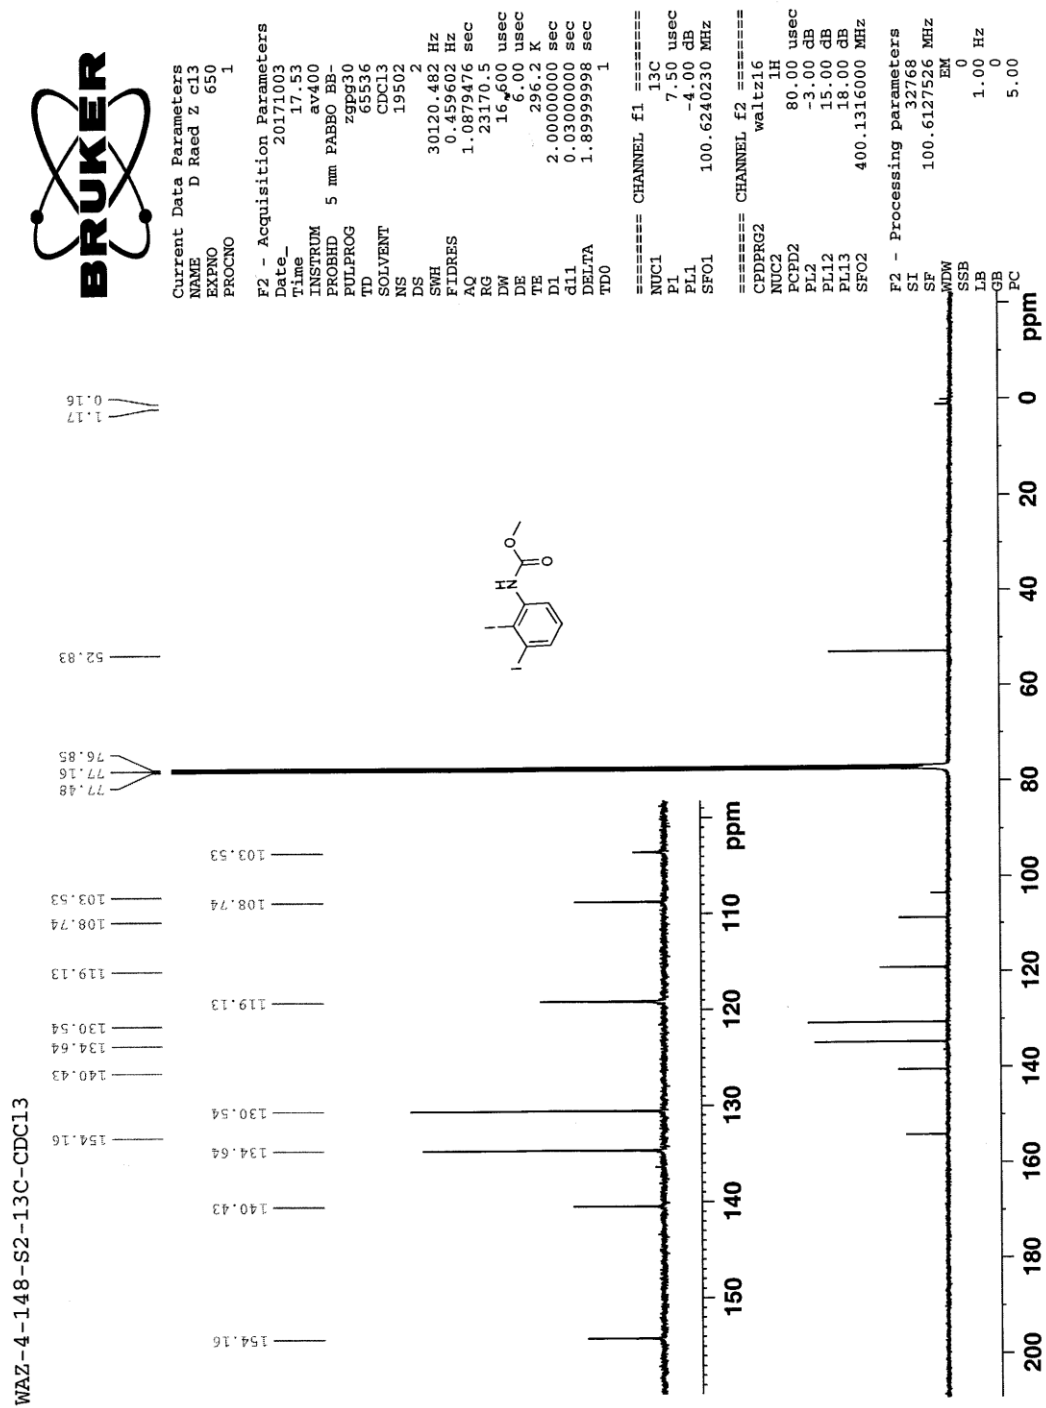

1.5.3  $^1\text{H-NMR}$  of ethyl (2,3-diiodophenyl)carbamate (6A) in  $\text{CDCl}_3$  at  $25^\circ\text{C}$ .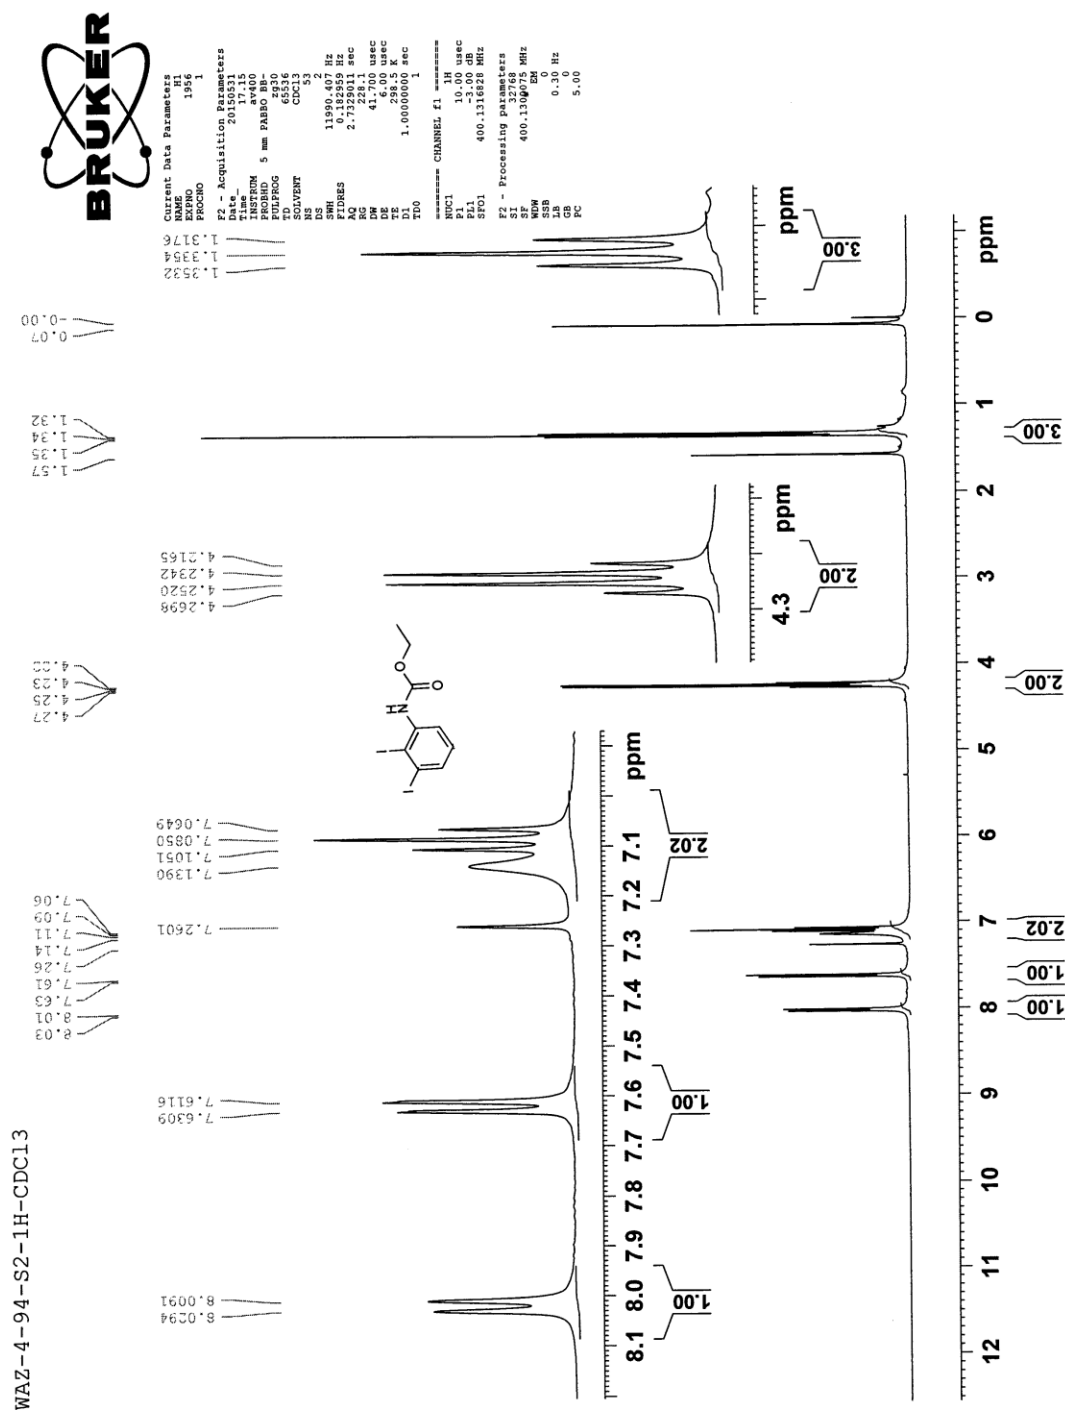

1.5.4  $^{13}\text{C}$ -NMR of ethyl (2,3-diiodophenyl)carbamate (6A) in  $\text{CDCl}_3$  at 25 °C.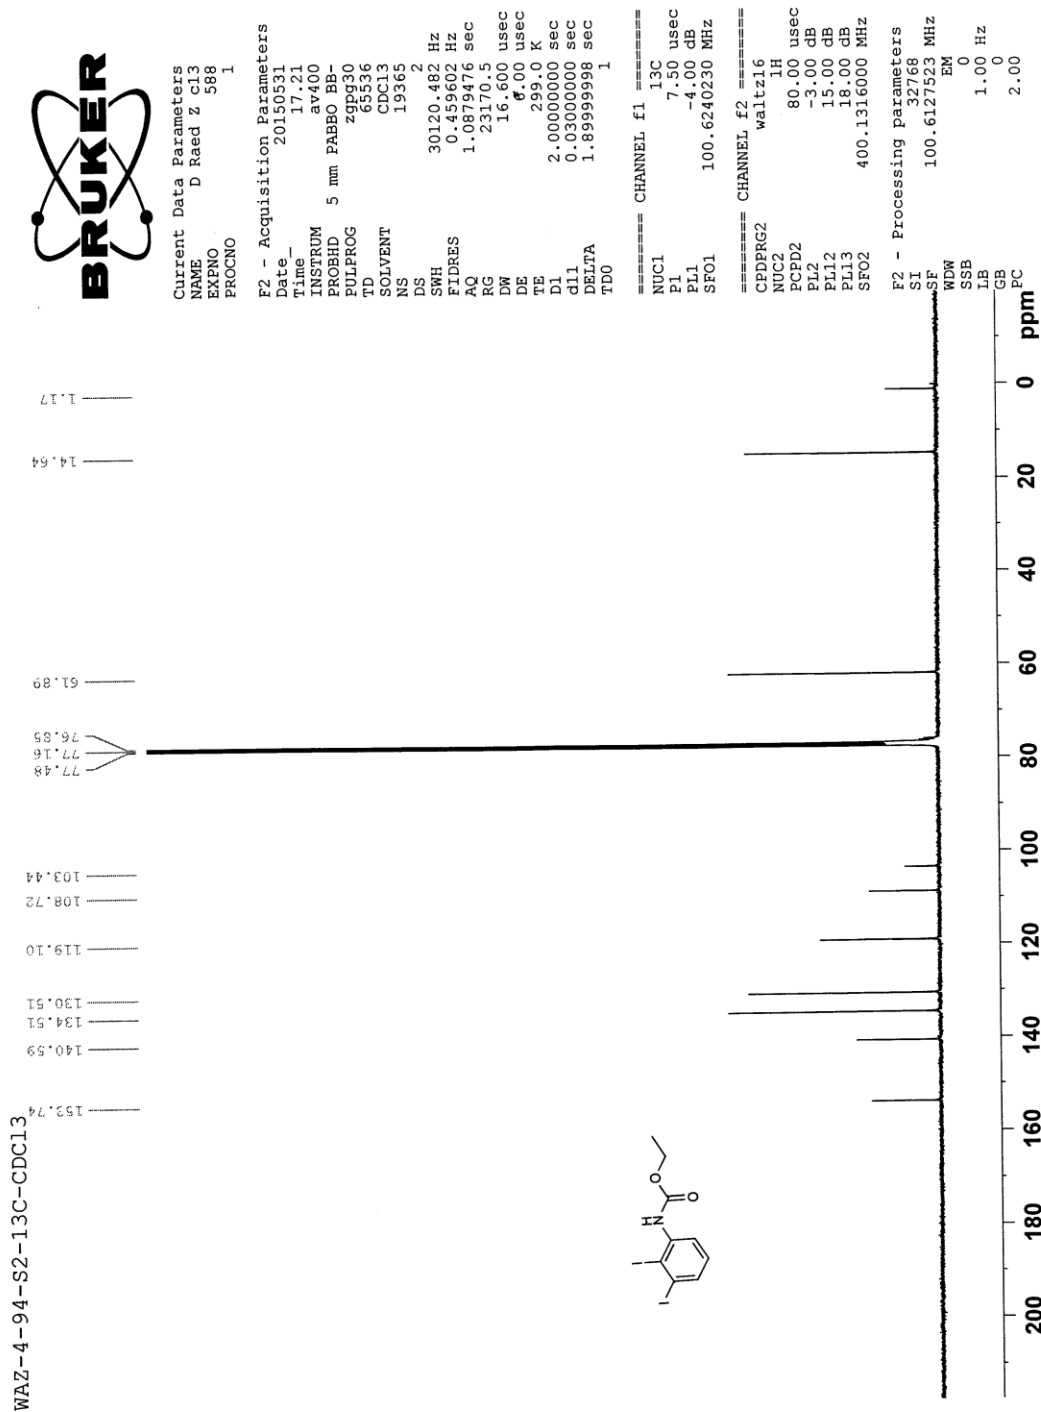

1.5.5  $^1\text{H-NMR}$  of *N*-(2,3-diiodophenyl)-2-phenoxyacetamide (7A) in  $\text{CDCl}_3$  at 25 °C.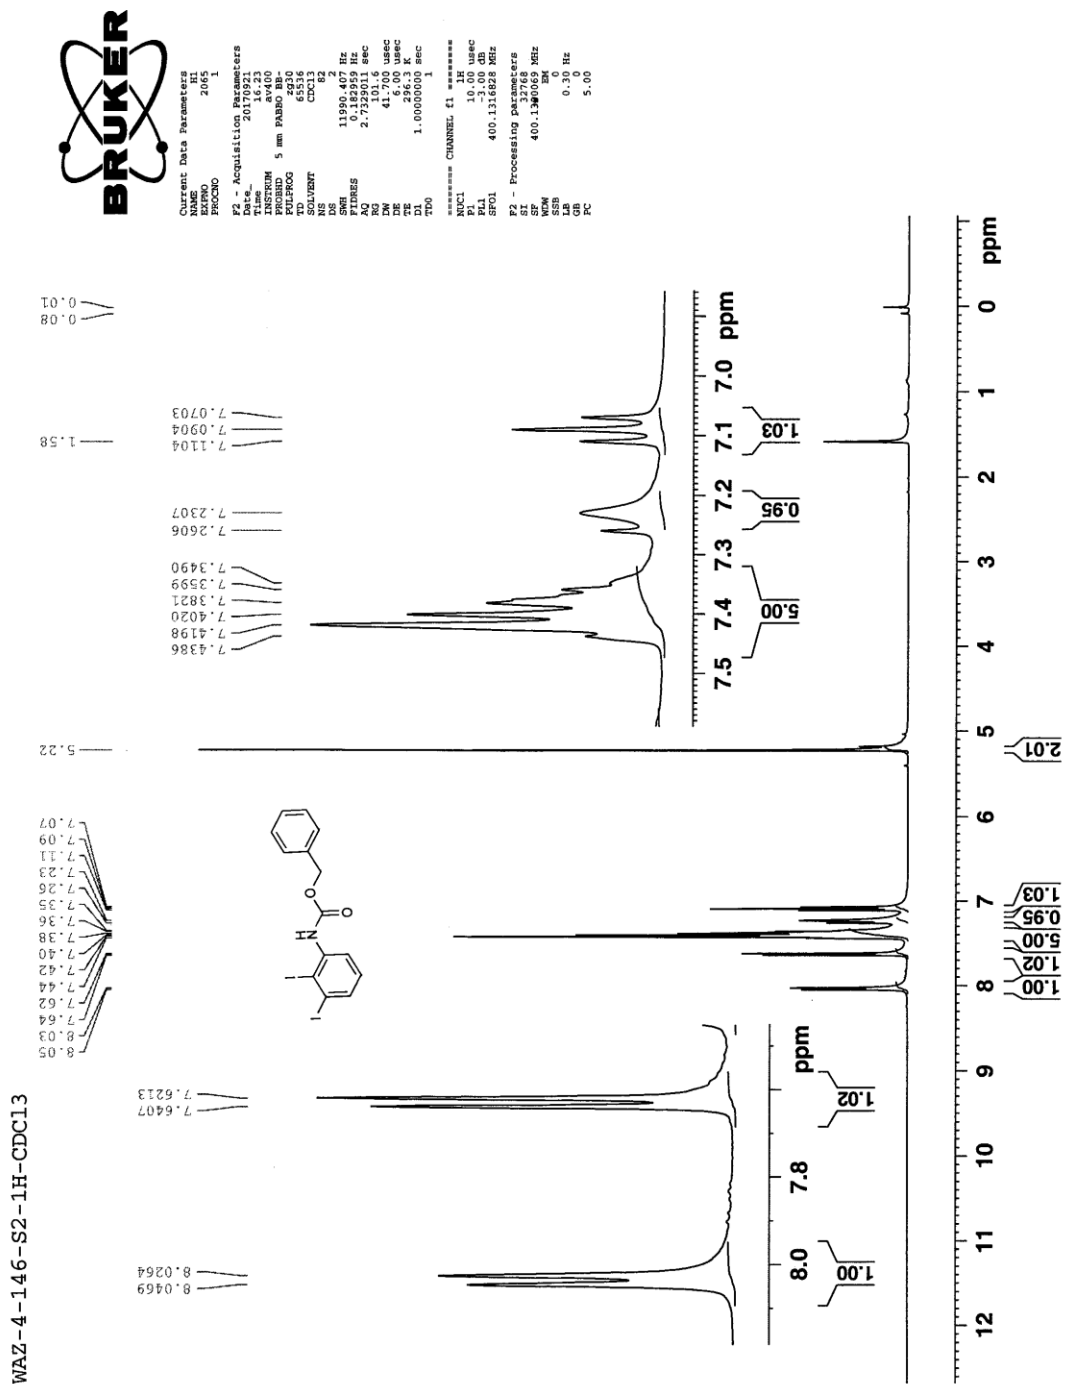



1.5.6  $^{13}\text{C}$ -NMR of *N*-(2,3-diiodophenyl)-2-phenoxyacetamide (7A) in  $\text{CDCl}_3$  at 25 °C.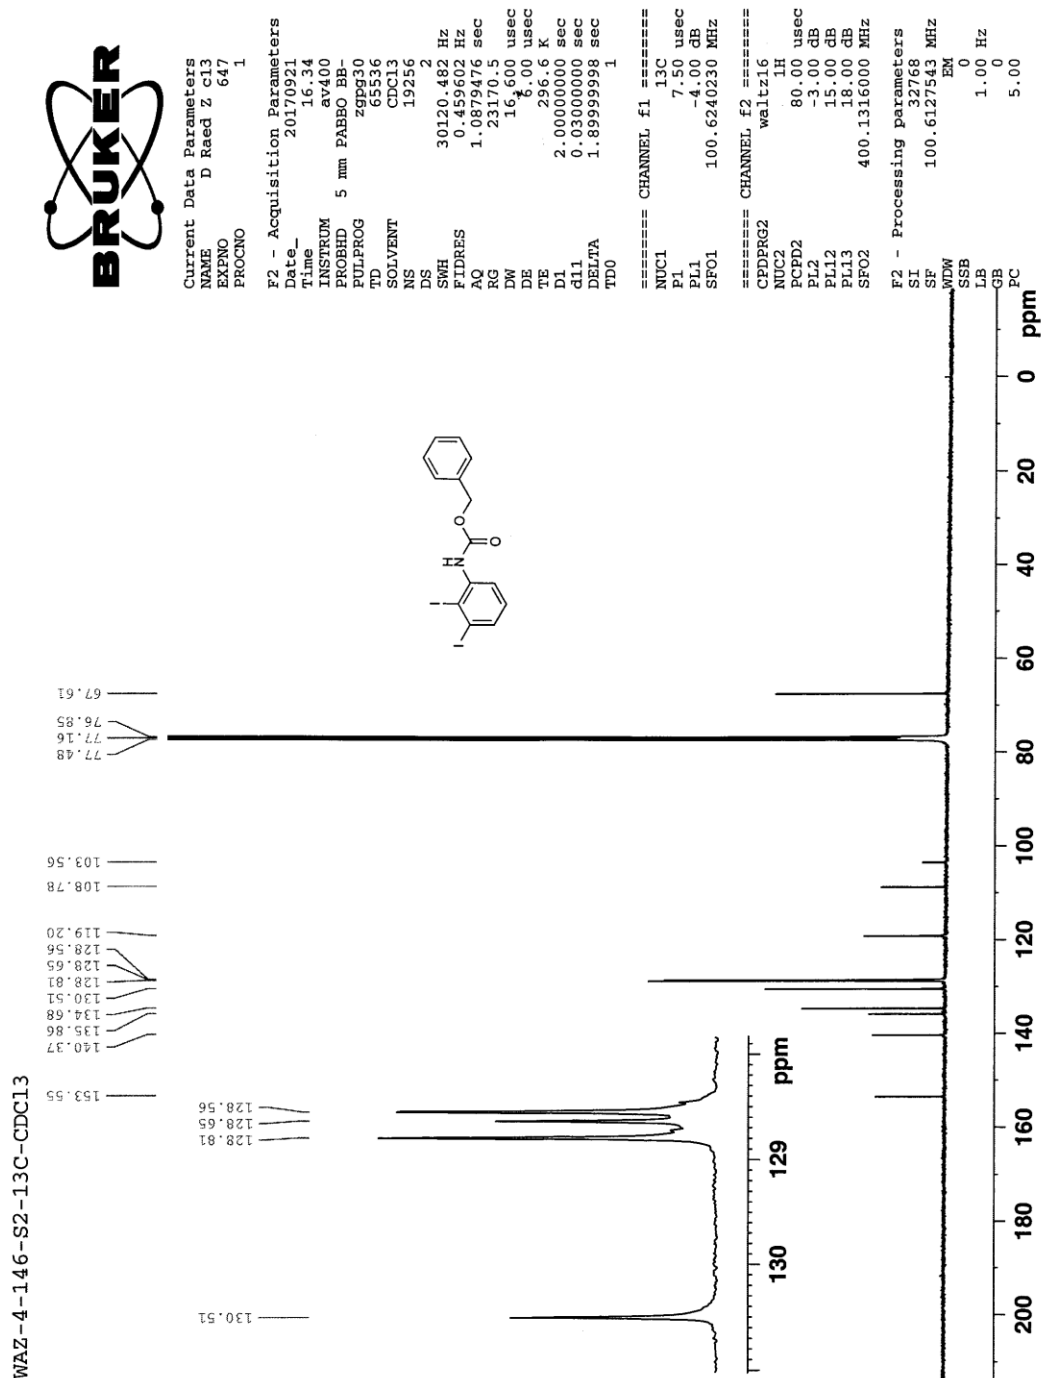

1.5.7  $^1\text{H-NMR}$  of *tert*-butyl (2,3-diiodophenyl)carbamate (8A) in  $\text{CDCl}_3$  at  $25^\circ\text{C}$ .

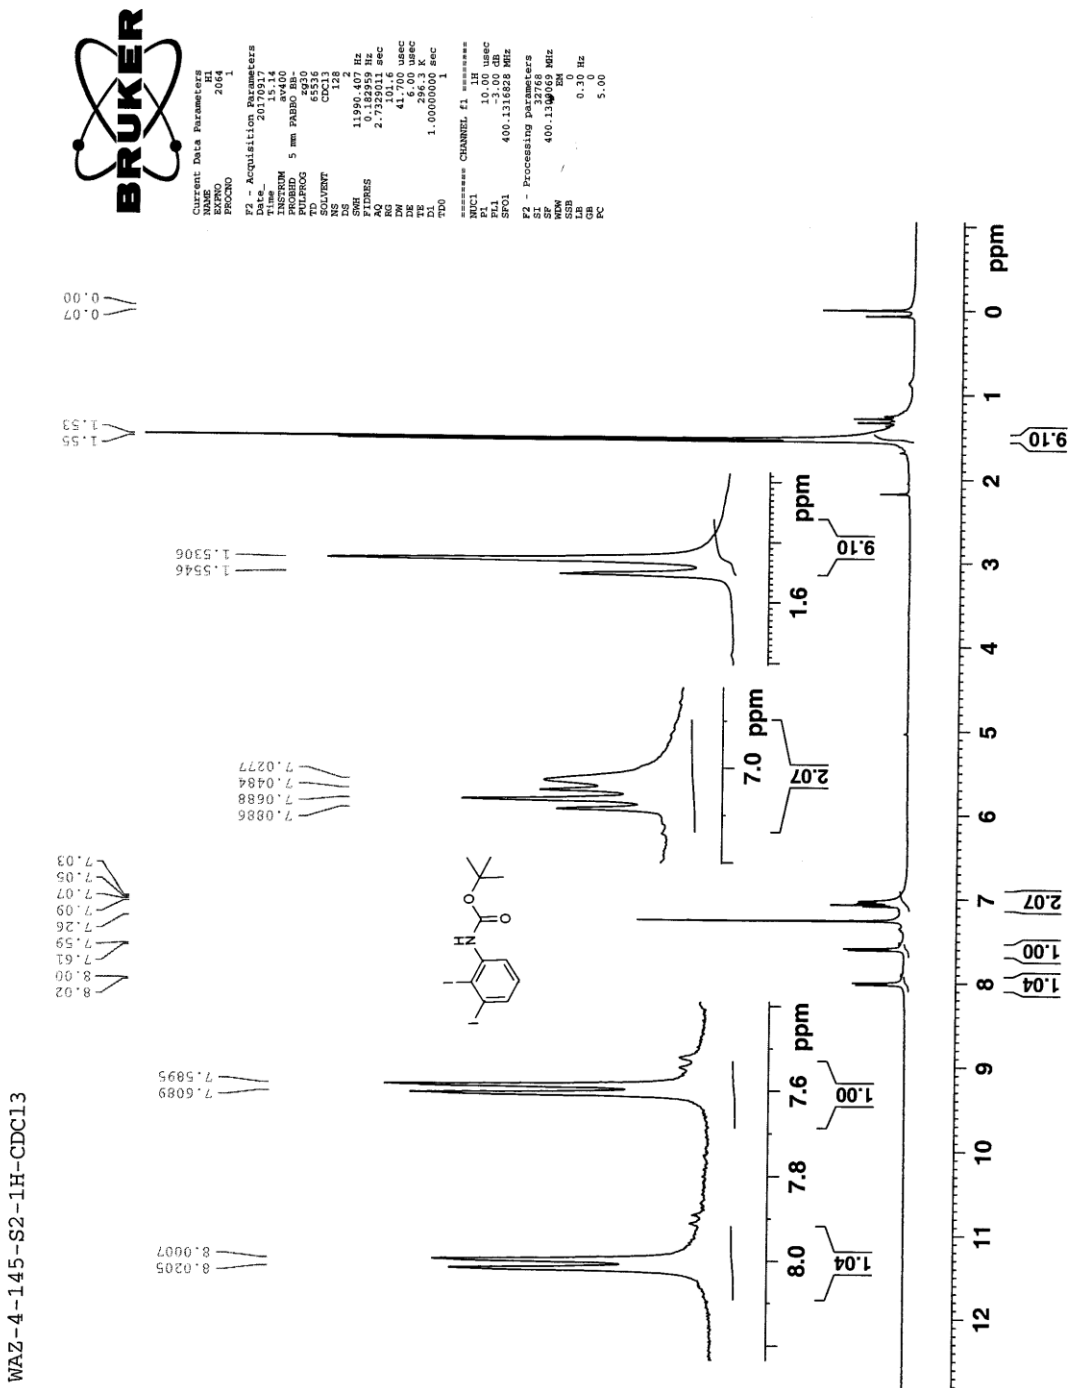

1.5.8 <sup>13</sup>C-NMR of tert-butyl (2,3-diiodophenyl)carbamate (8A) in CDCl<sub>3</sub> at 25 °C.

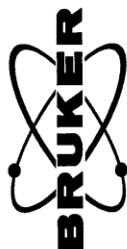

Current Data Parameters  
 NAME D Raed Z c13  
 EXPNO 646  
 PROCNO 1

F2 - Acquisition Parameters  
 Date\_ 20170917  
 Time 15.24  
 INSTRUM av400  
 PROHD 5 mm PABBO BB-  
 PULPROG zgpg30  
 TD 65536  
 SOLVENT CDCl3  
 NS 6000  
 DS 2  
 SWH 30120.482 Hz  
 FIDRES 0.459602 Hz  
 AQ 1.0879476 sec  
 RG 23170.5  
 DW 16.600 usec  
 DE 6.00 usec  
 TE 296.4 K  
 D1 2.00000000 sec  
 d11 0.03000000 sec  
 DELTA 1.89999998 sec  
 TDO 1

==== CHANNEL f1 =====  
 NUC1 13C  
 P1 7.50 usec  
 PL1 -4.00 dB  
 SFO1 100.6240230 MHz

==== CHANNEL f2 =====  
 CPDPRG2 waltz16  
 NUC2 1H  
 PCPD2 80.00 usec  
 PL2 -3.00 dB  
 PL12 15.00 dB  
 PL13 18.00 dB  
 SFO2 400.1316000 MHz

F2 - Processing parameters  
 SI 32768  
 SF 100.6127517 MHz  
 EM 0  
 WDW 0  
 SSB 0  
 LB 1.00 Hz  
 GB 0  
 PC 5.00

WAZ-4-144-S2-13C-CDCl3  
 145

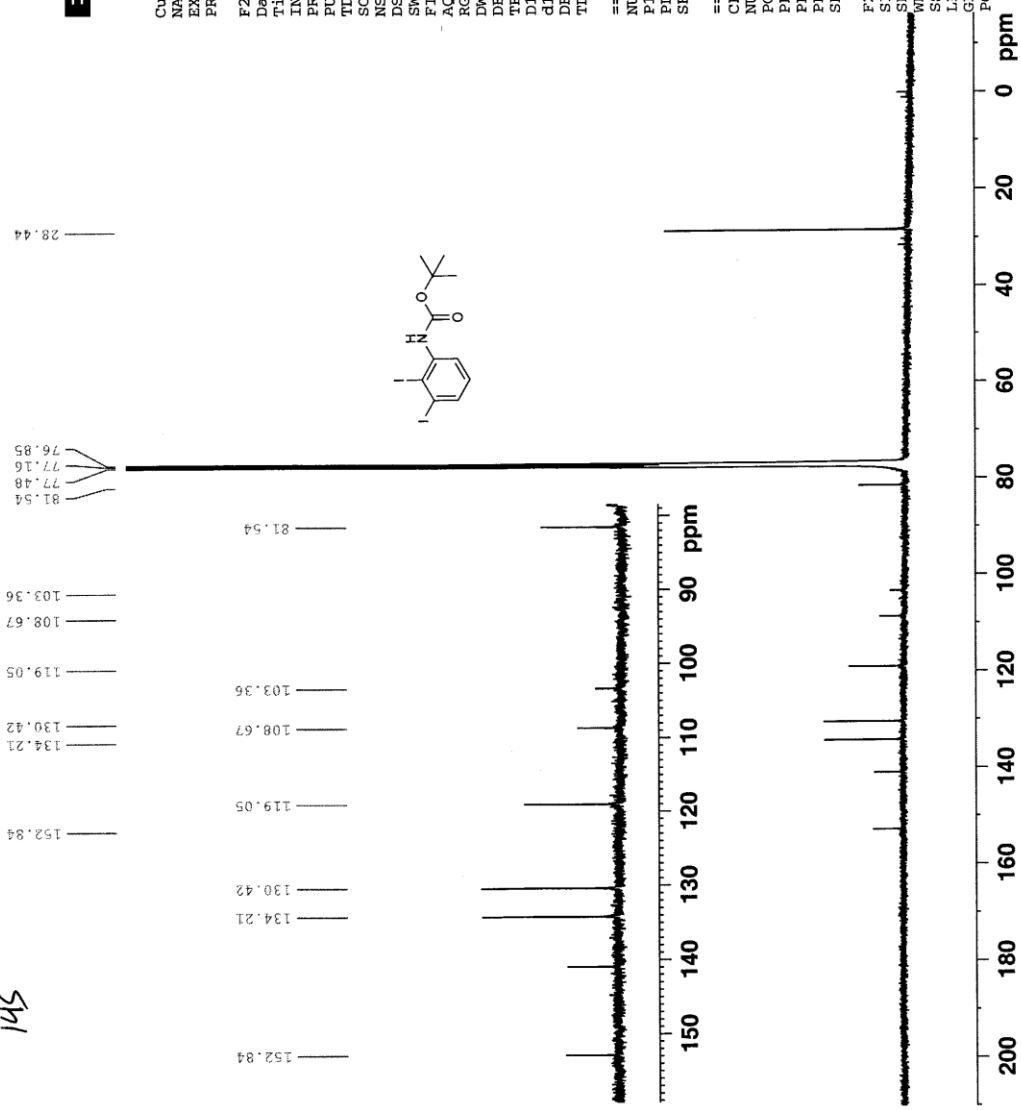

1.5.9  $^1\text{H-NMR}$  of (2,3-diiodo-5-methylphenyl)carbamate (10A) in  $\text{CDCl}_3$  at 25 °C.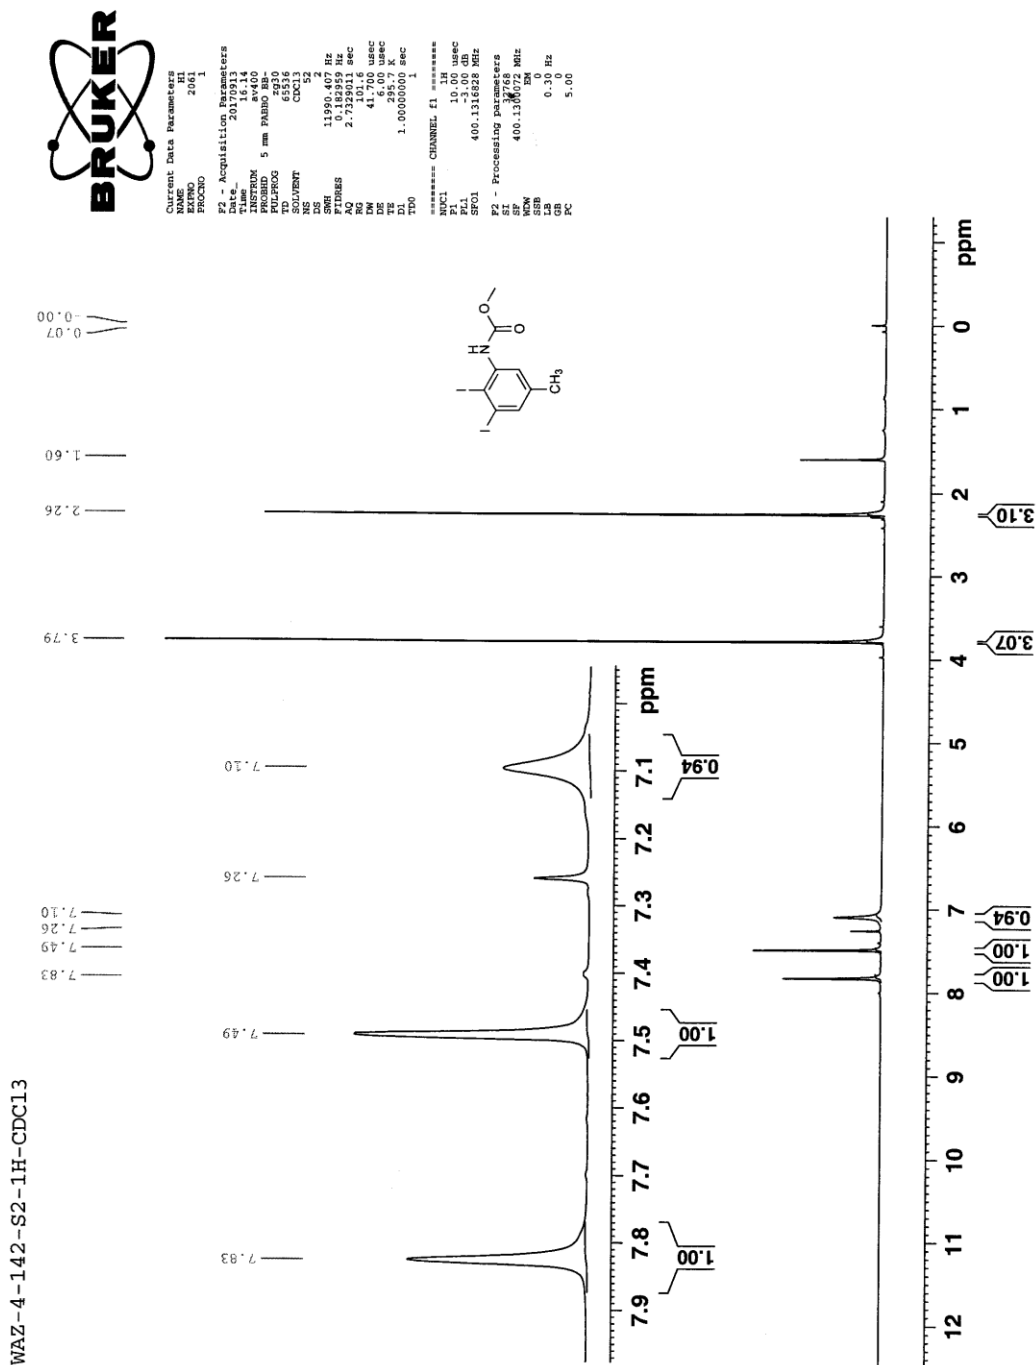

1.5.10  $^{13}\text{C}$ -NMR of (2,3-diiodo-5-methylphenyl)carbamate (10A) in  $\text{CDCl}_3$  at 25 °C.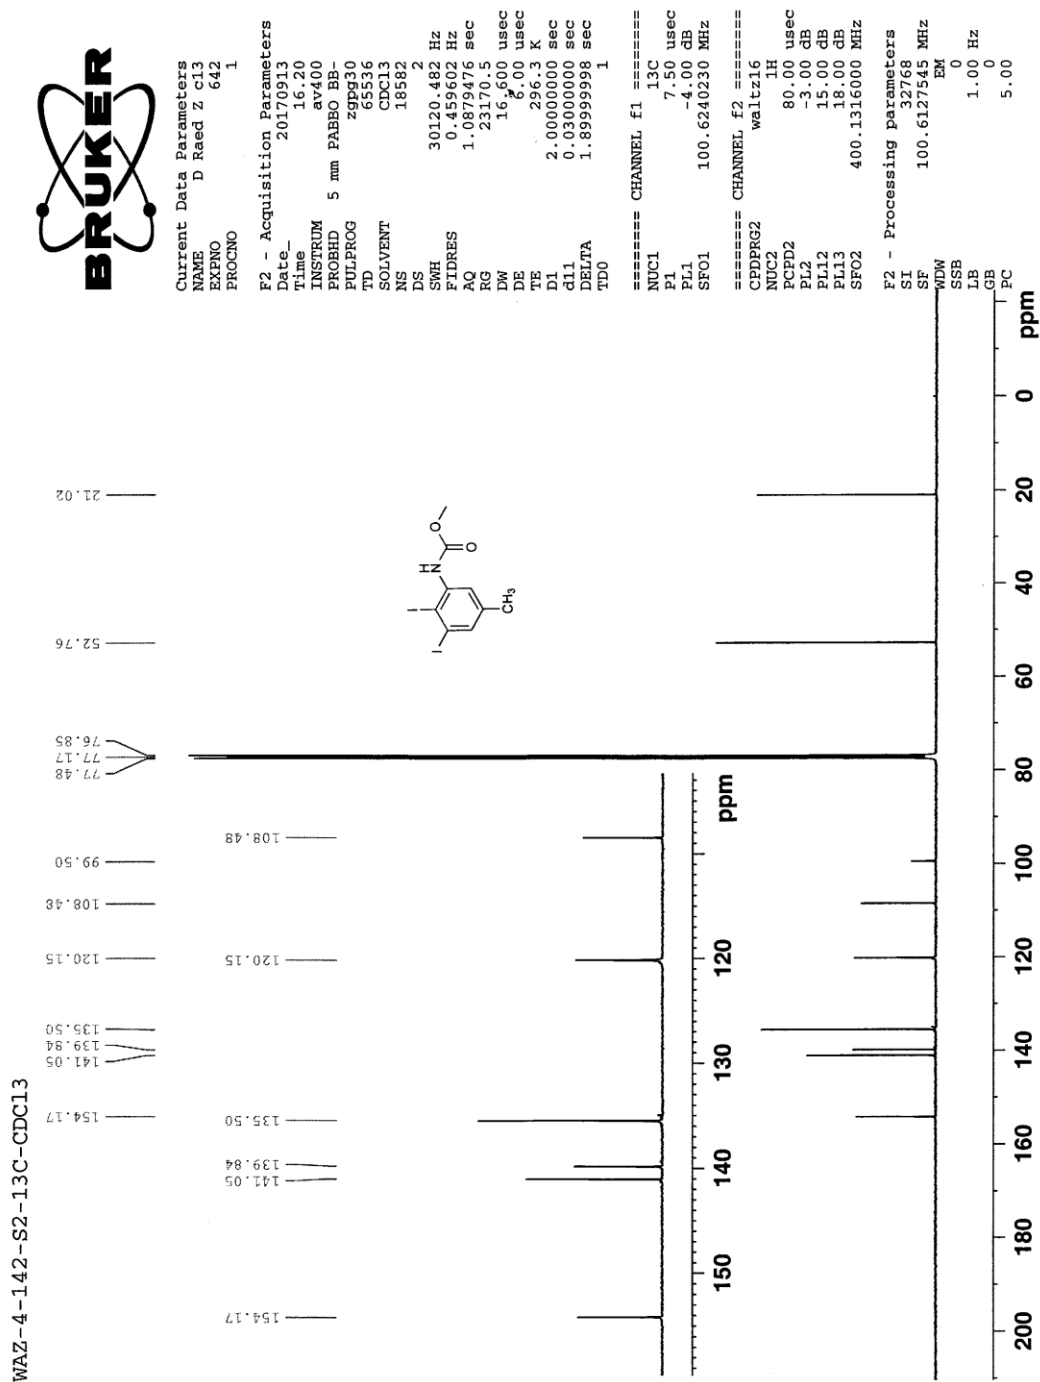

1.5.11  $^1\text{H-NMR}$  of ethyl (2,3-diiodo-5-methylphenyl)carbamate (11A) in  $\text{CDCl}_3$  at  $25^\circ\text{C}$ .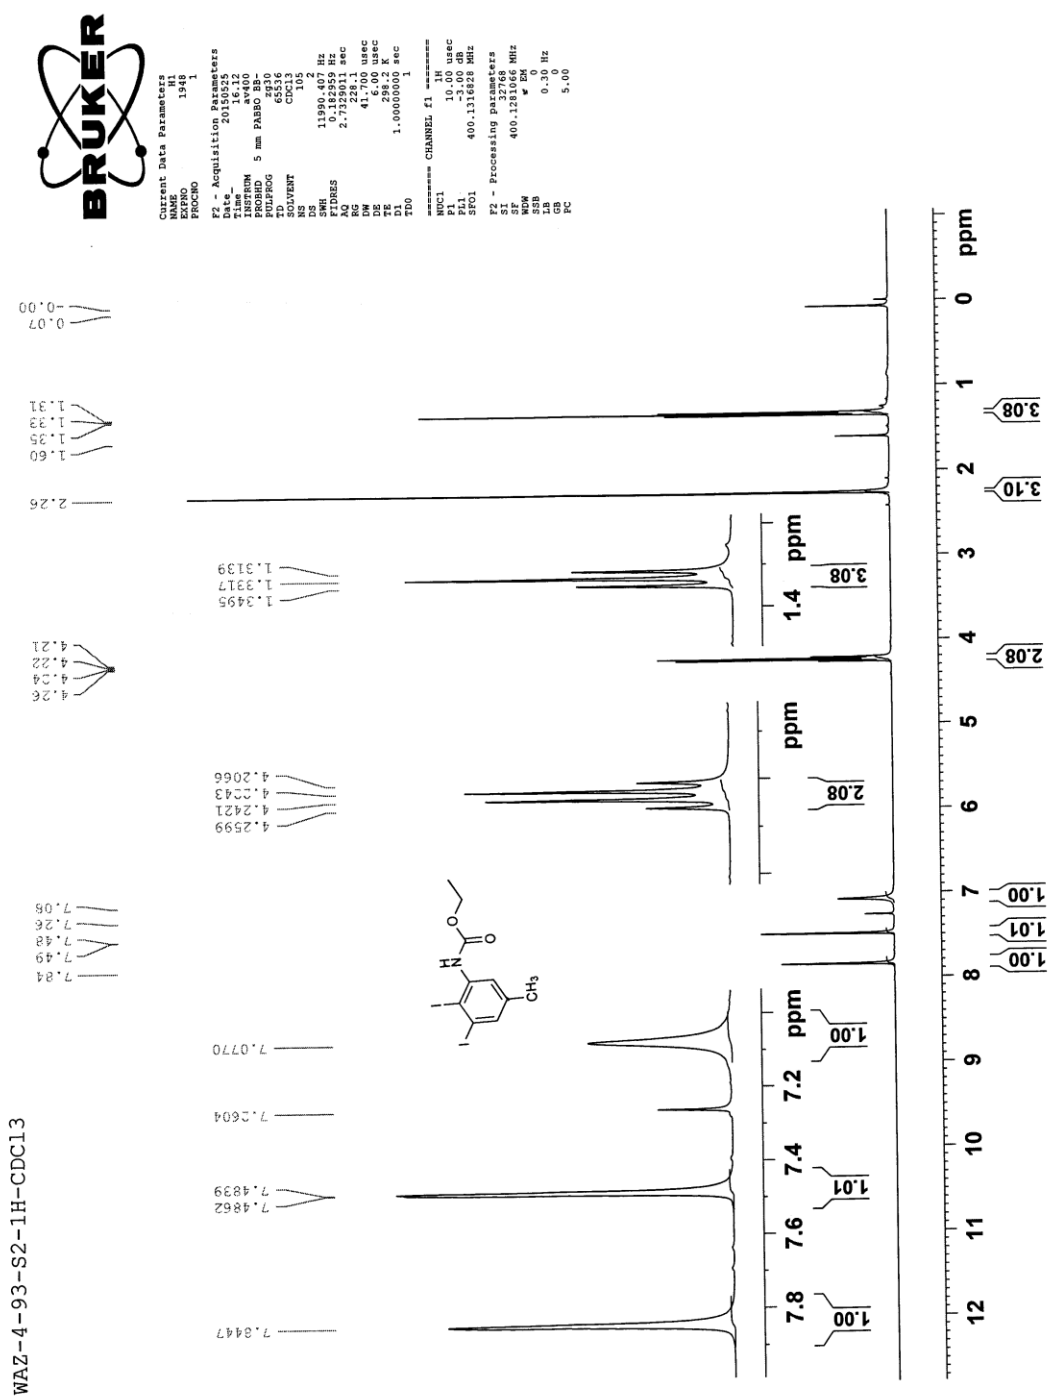

1.5.12  $^{13}\text{C}$ -NMR of ethyl (2,3-diiodo-5-methylphenyl)carbamate (11A) in  $\text{CDCl}_3$  at 25  $^\circ\text{C}$ .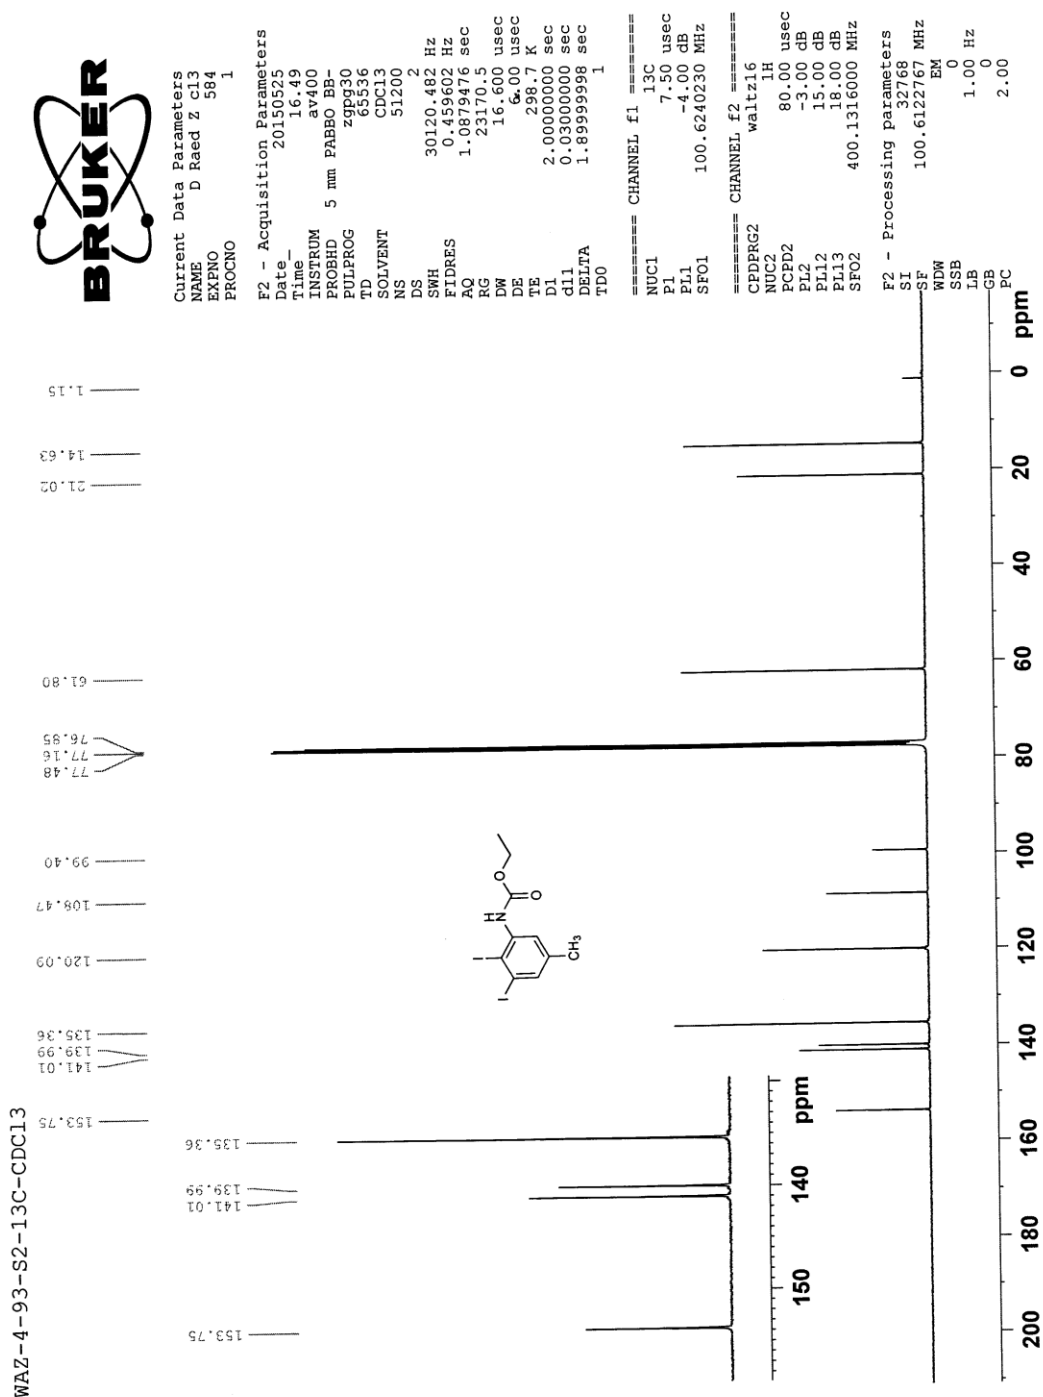

1.5.13  $^1\text{H-NMR}$  of benzyl (2,3-diiodo-5-methylphenyl)carbamate (12A) in  $\text{CDCl}_3$  at 25  $^\circ\text{C}$ .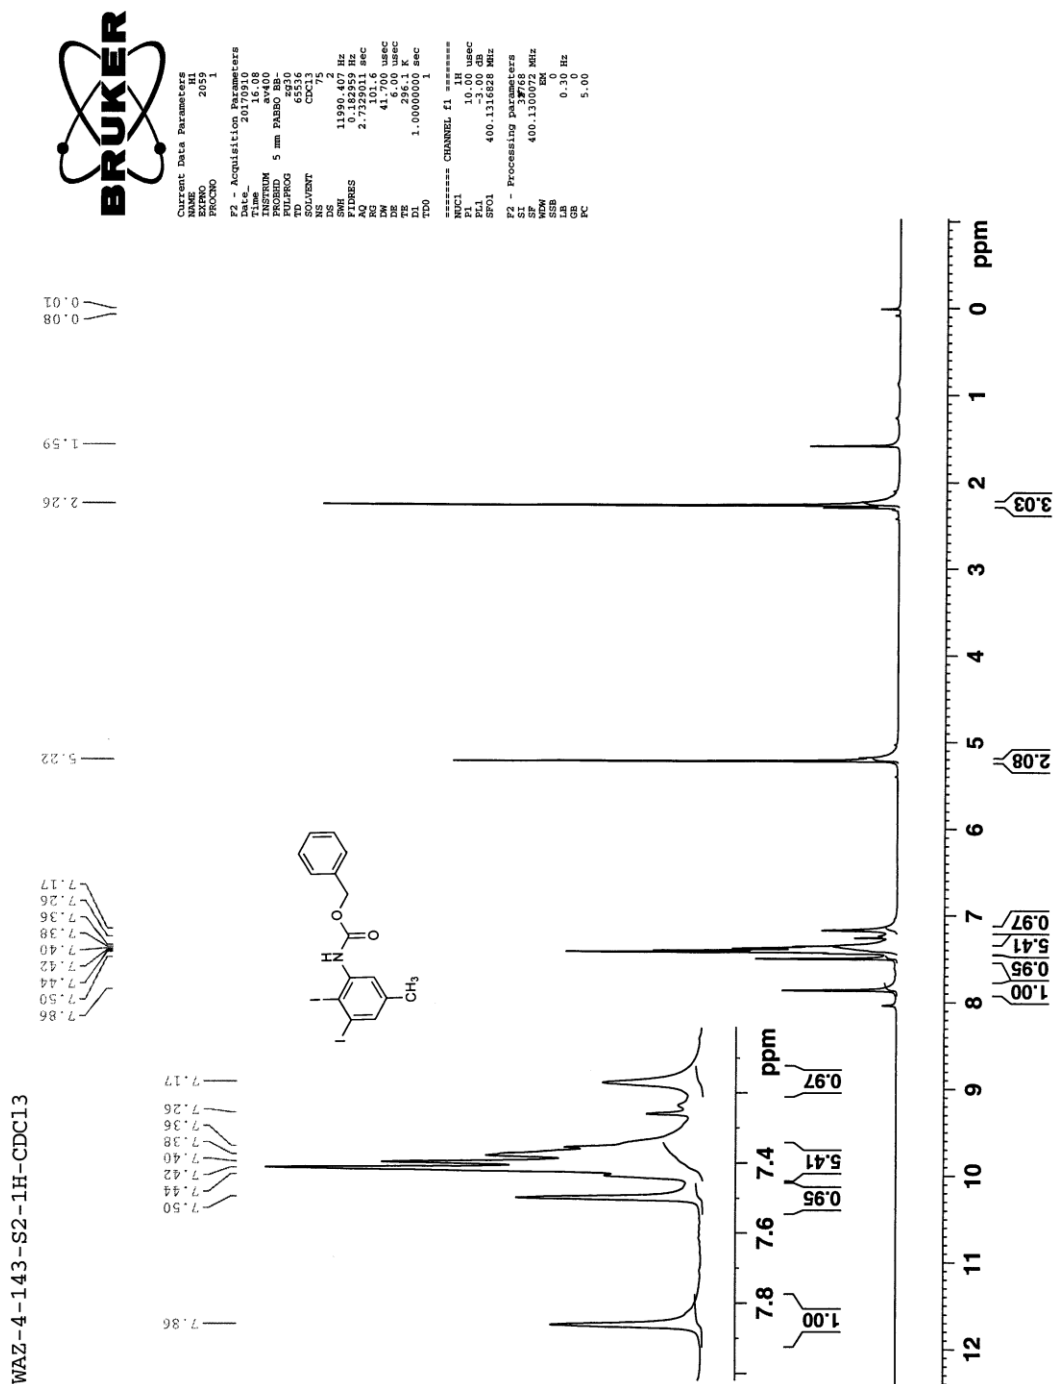



1.5.14 <sup>13</sup>C-NMR of benzyl (2,3-diiodo-5-methylphenyl)carbamate (12A) in CDCl<sub>3</sub> at 25 °C.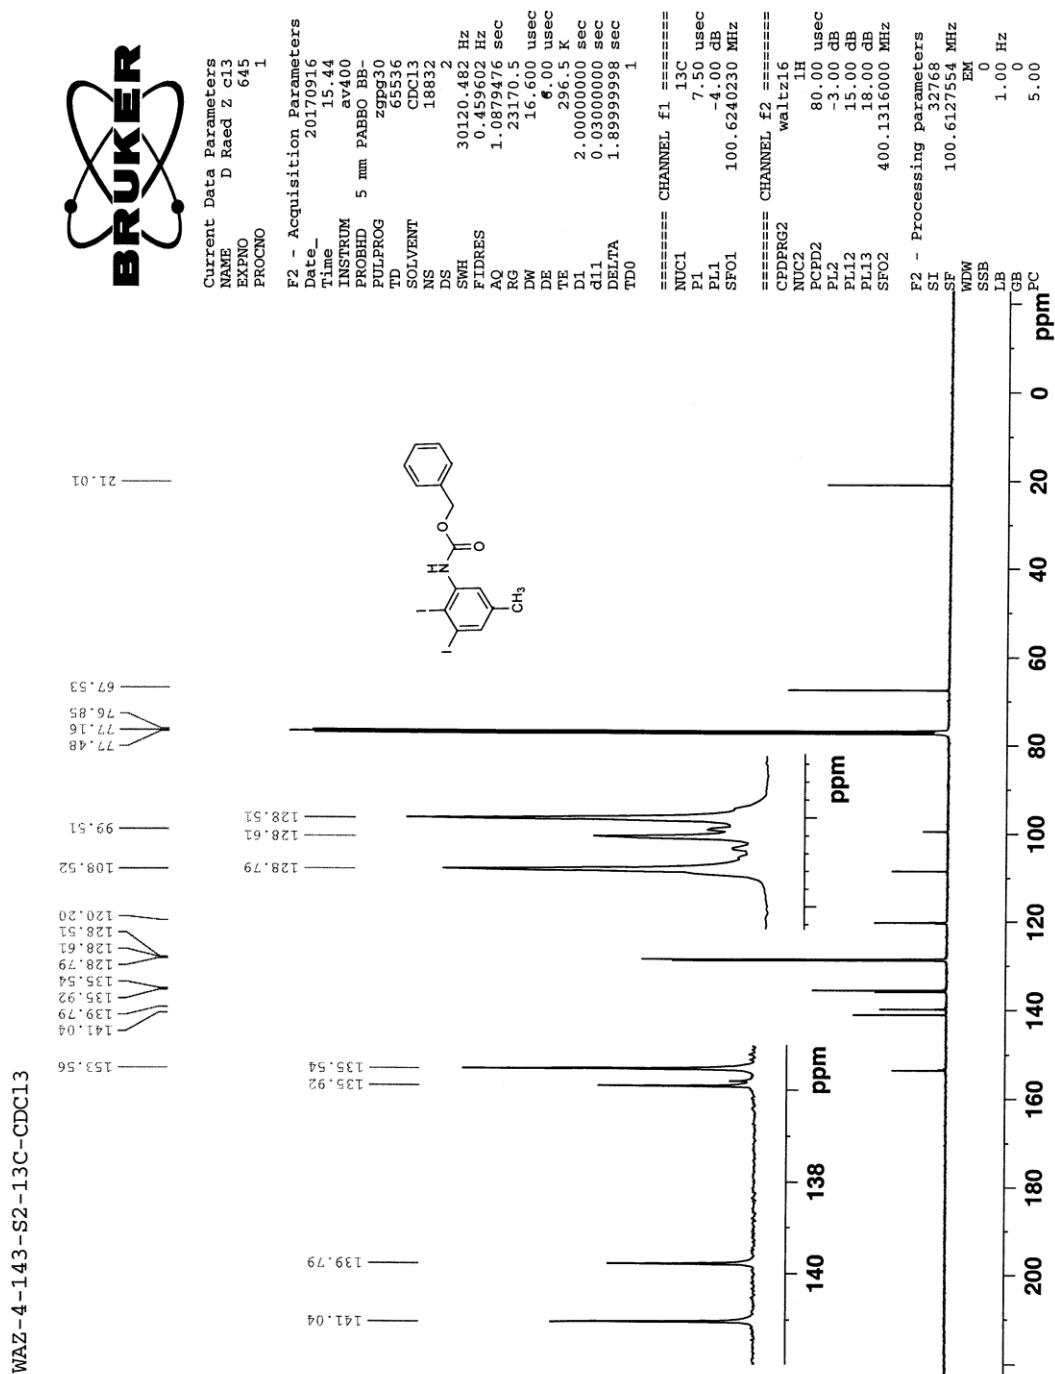

1.5.15  $^1\text{H-NMR}$  of *tert*-butyl (2,3-diiodo-5-methylphenyl)carbamate (13A) in  $\text{CDCl}_3$  at  $25^\circ\text{C}$ .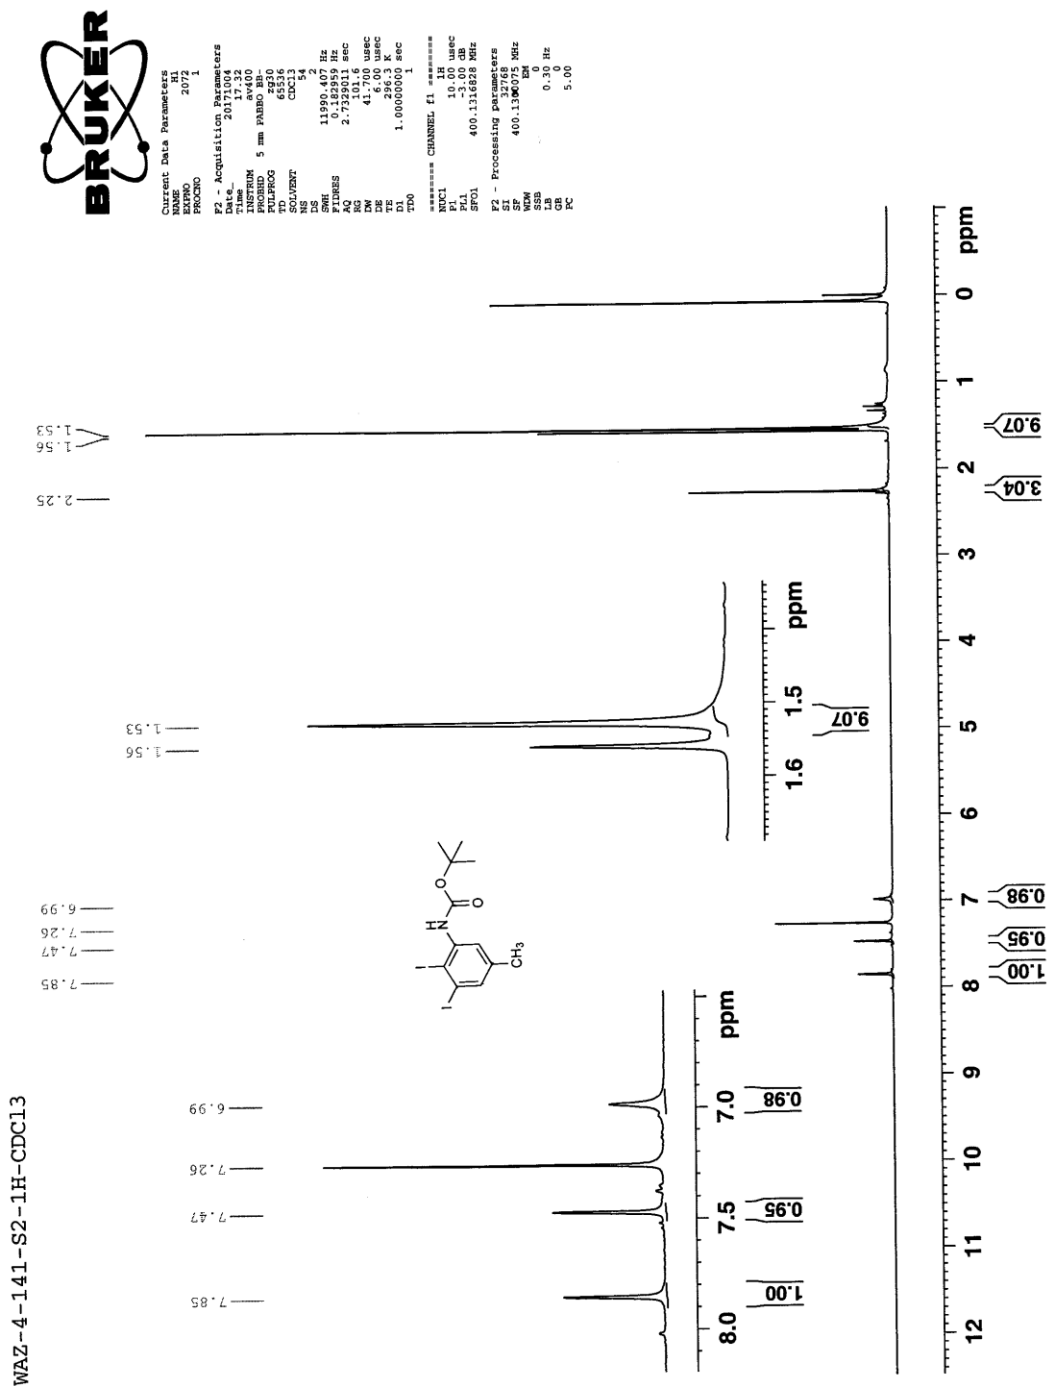

1.5.16  $^{13}\text{C}$ -NMR of *tert*-butyl (2,3-diiodo-5-methylphenyl)carbamate (13A) in  $\text{CDCl}_3$  at 25 °C.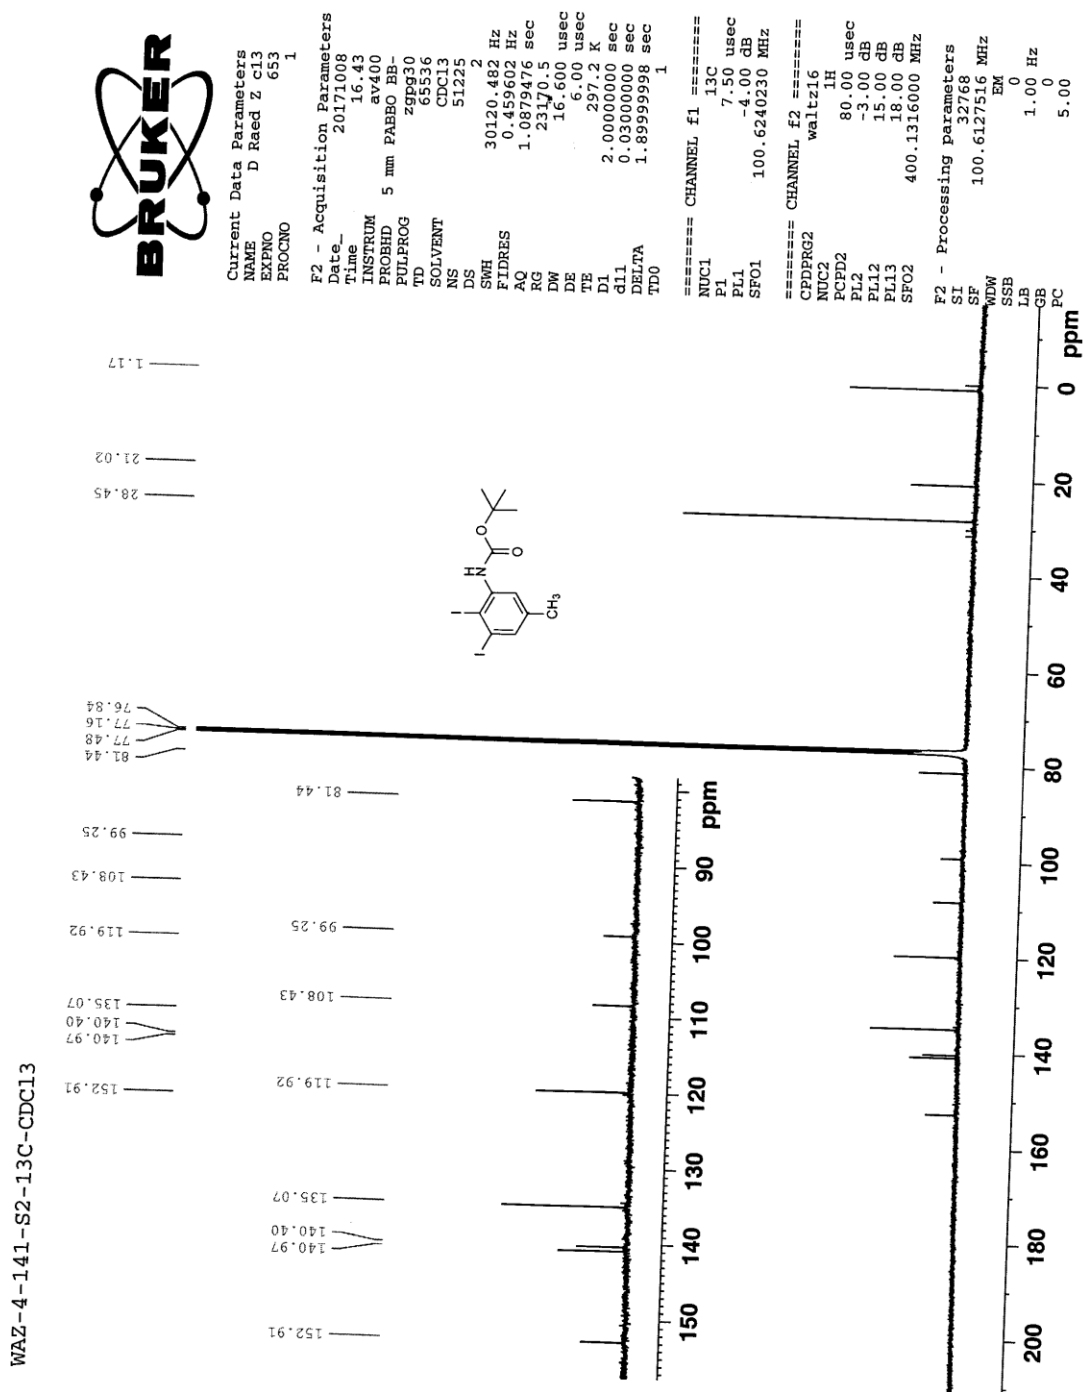

1.5.17 <sup>1</sup>H-NMR of ethyl (5-fluoro-2,3-diiodophenyl)carbamate (15A) in CDCl<sub>3</sub> at 25 °C.

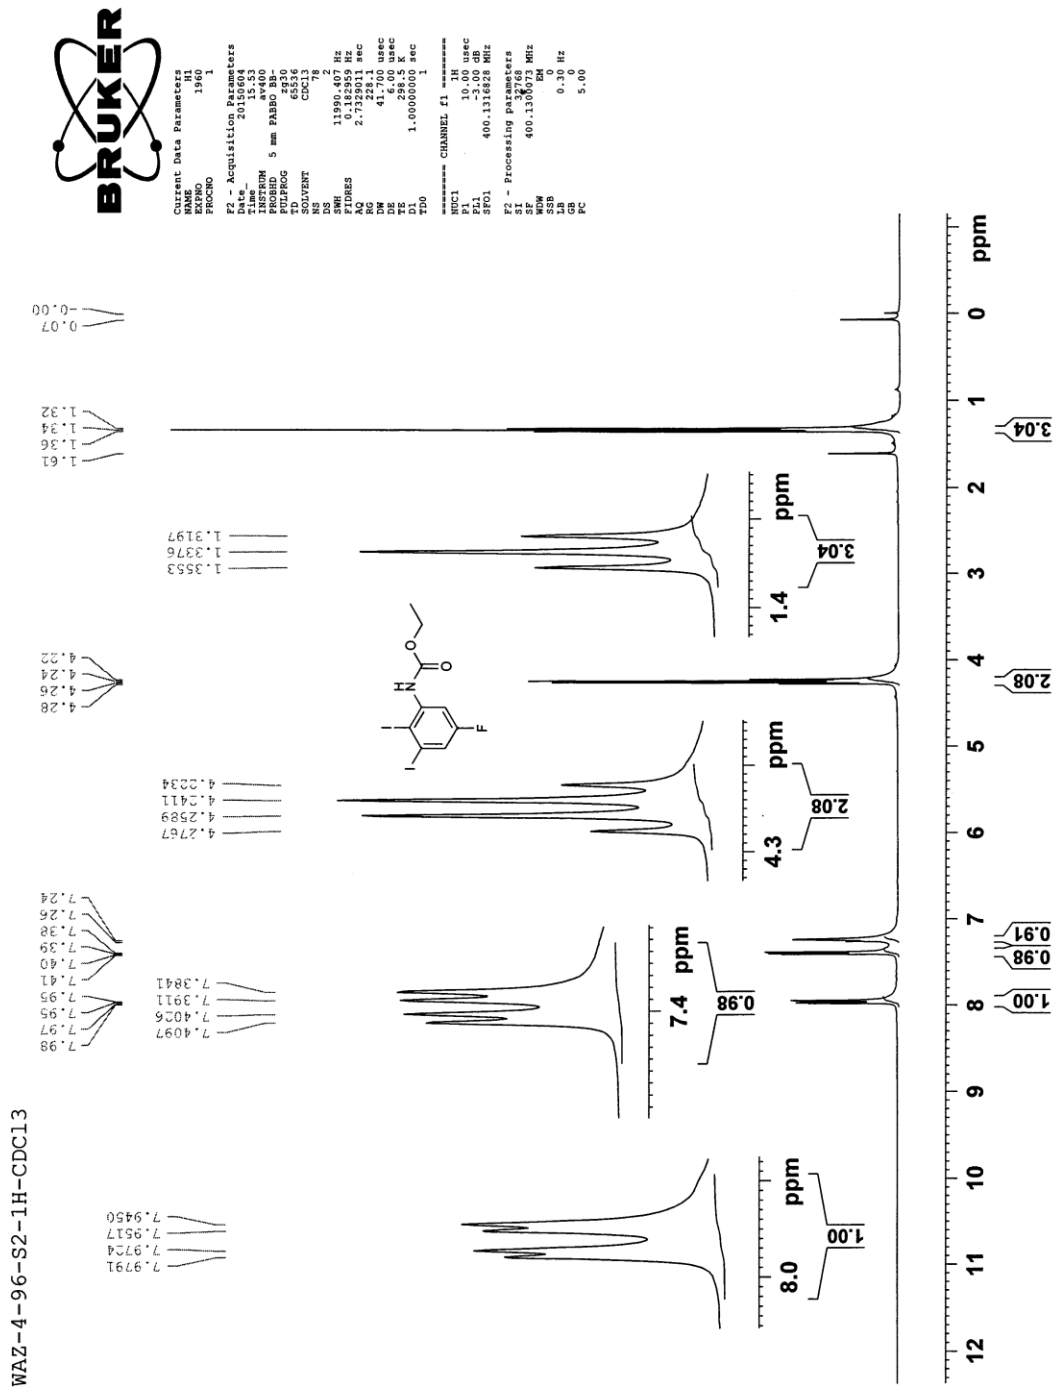

1.5.18  $^{13}\text{C}$ -NMR of ethyl (5-fluoro-2,3-diiodophenyl)carbamate (15A) in  $\text{CDCl}_3$  at 25 °C.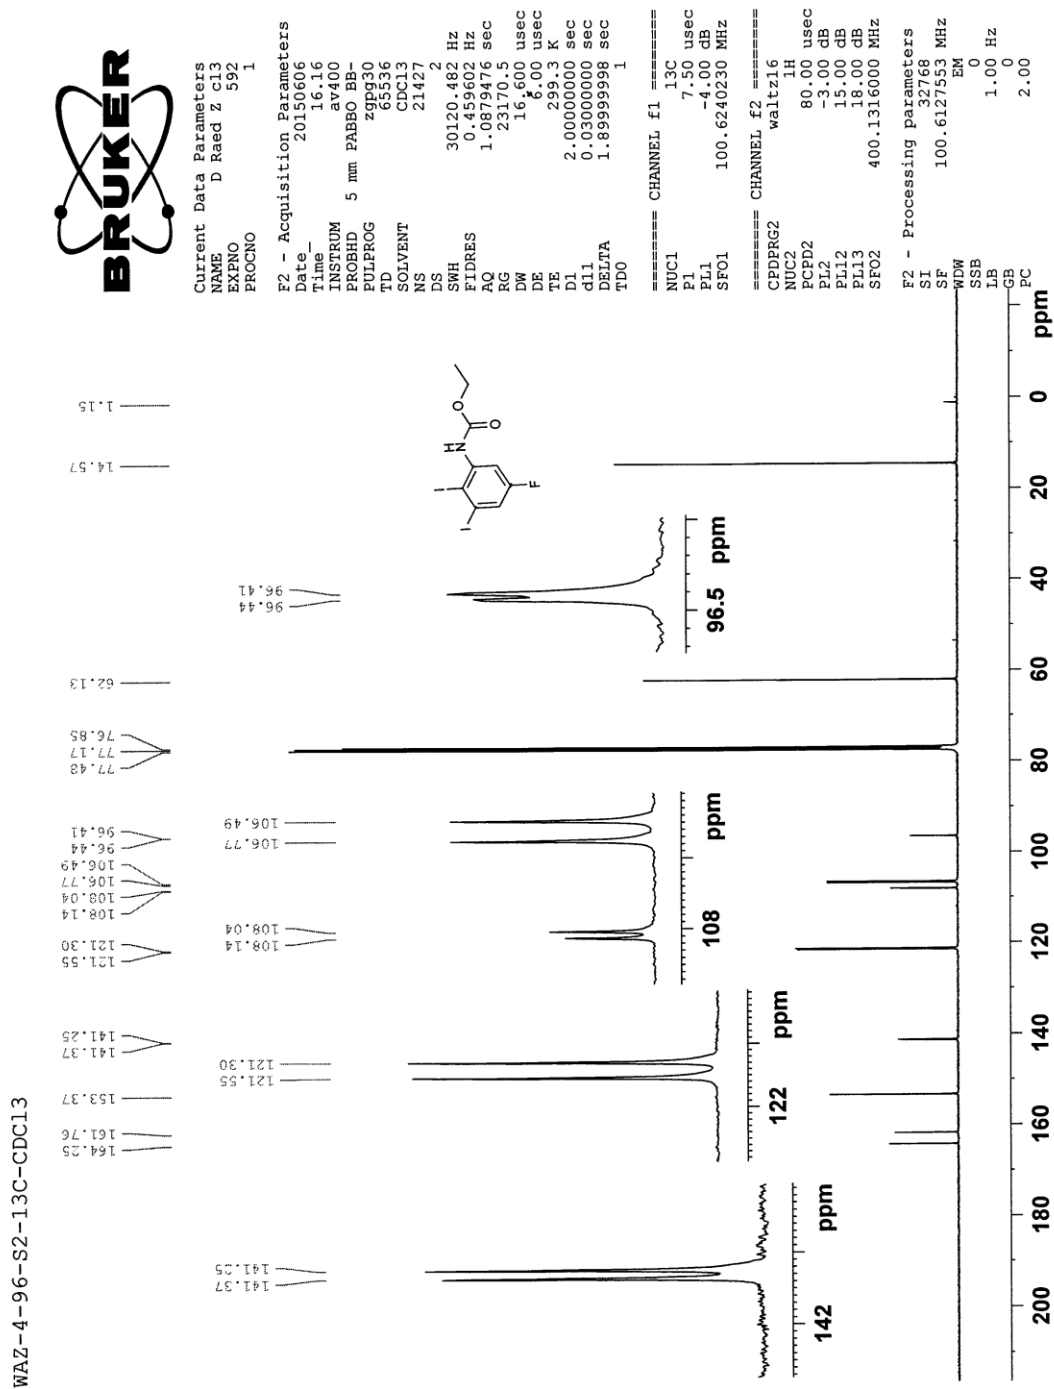

1.5.19  $^1\text{H-NMR}$  of benzyl (5-fluoro-2,3-diiodophenyl)carbamate (16A) in  $\text{CDCl}_3$  at 25  $^\circ\text{C}$ .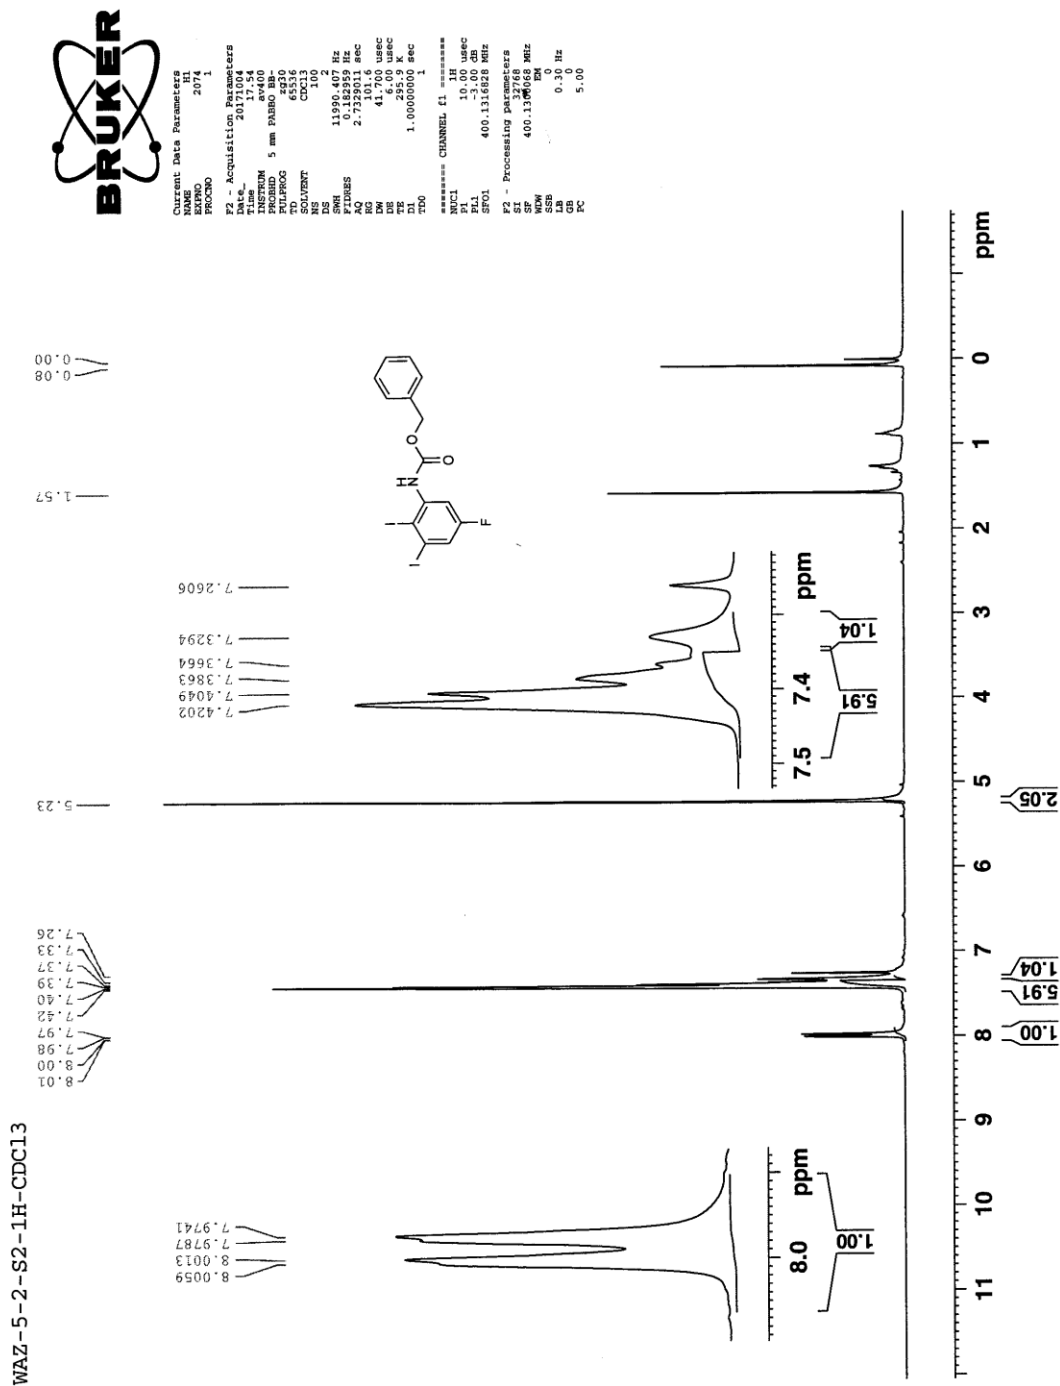

1.5.20 <sup>13</sup>C-NMR of benzyl (5-fluoro-2,3-diiodophenyl)carbamate (16A) in CDCl<sub>3</sub> at 25 °C.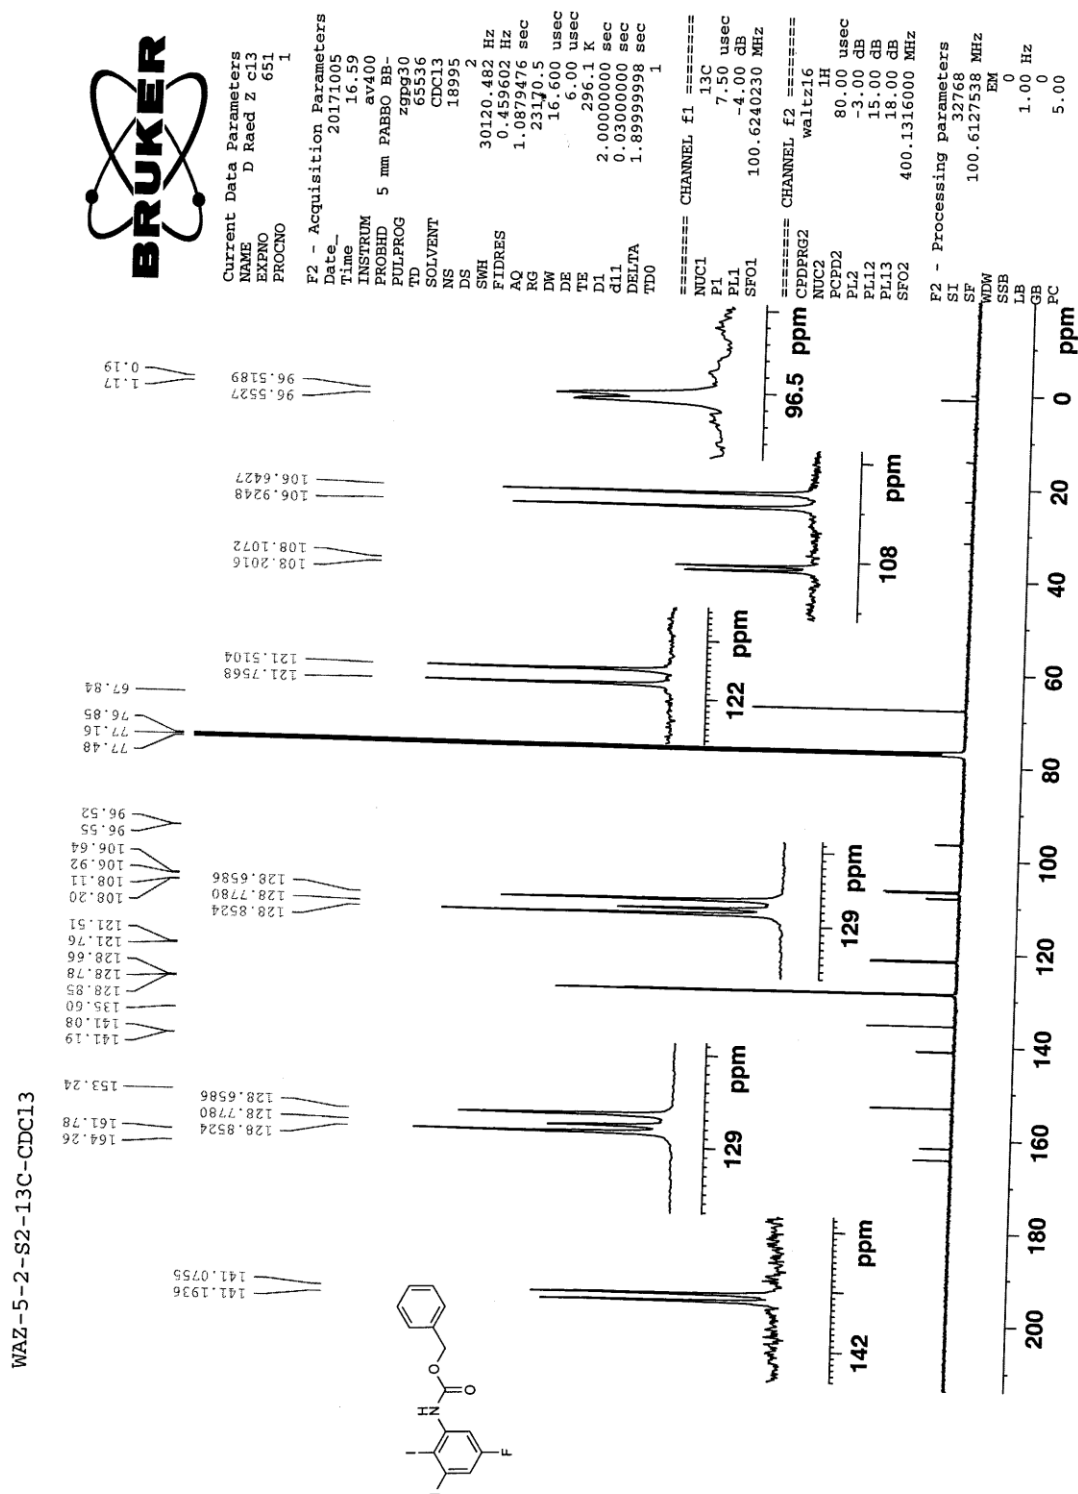

1.5.21 <sup>1</sup>H-NMR of ethyl (5-chloro-2,3-diiodophenyl)carbamate (17A) in CDCl<sub>3</sub> at 25 °C.

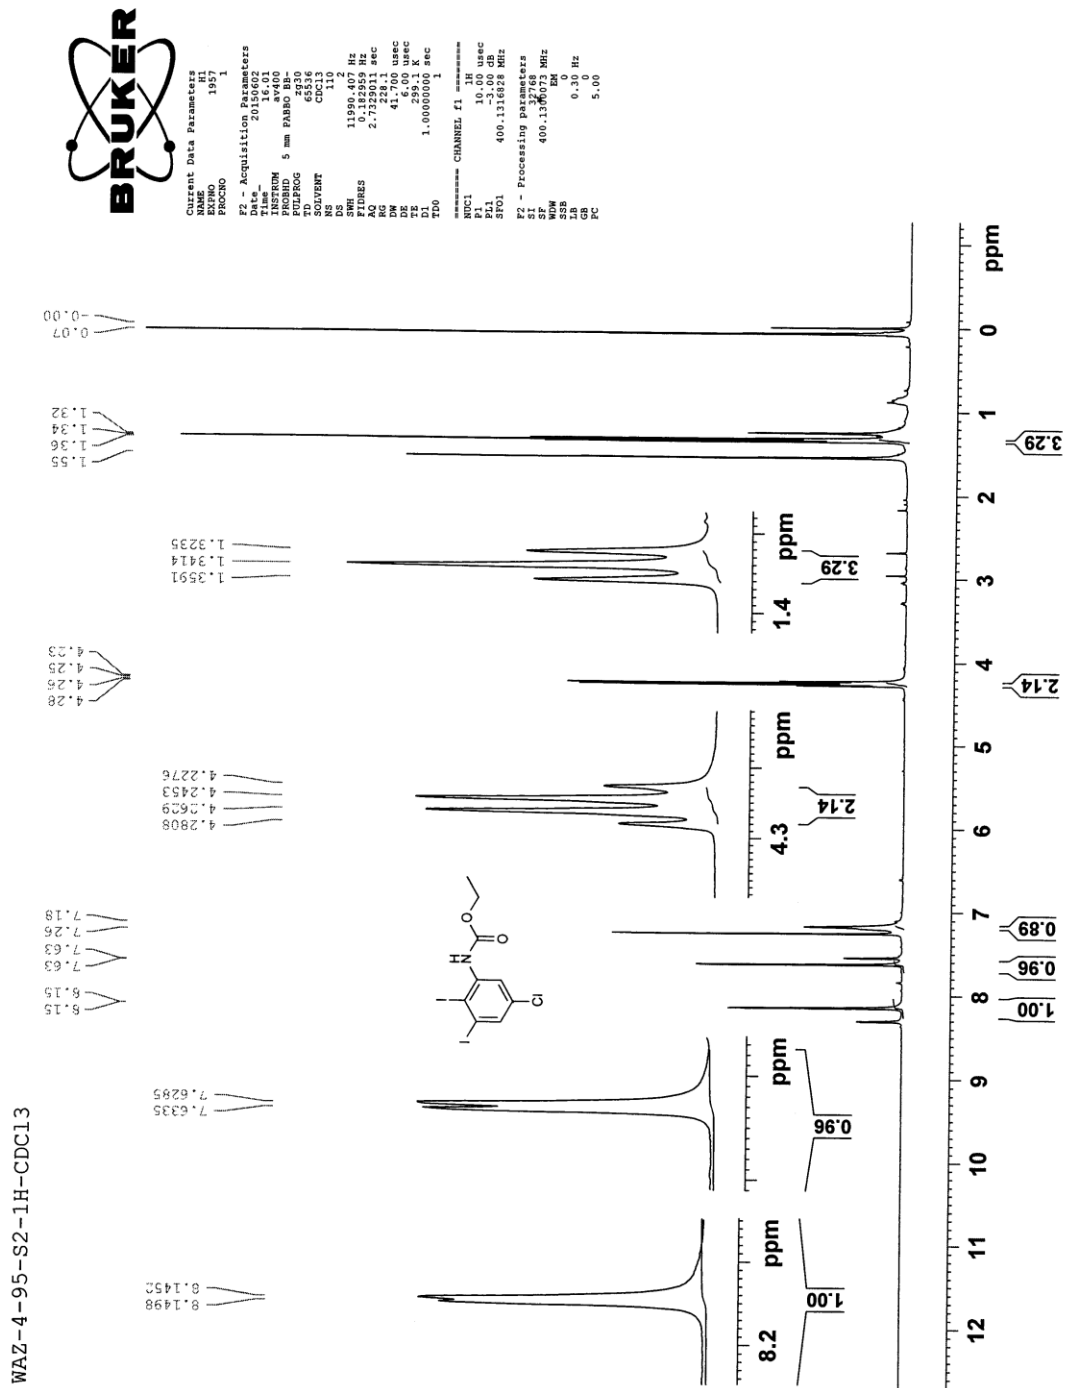



1.5.22 <sup>13</sup>C-NMR of ethyl (5-chloro-2,3-diiodophenyl)carbamate (17A) in CDCl<sub>3</sub> at 25 °C.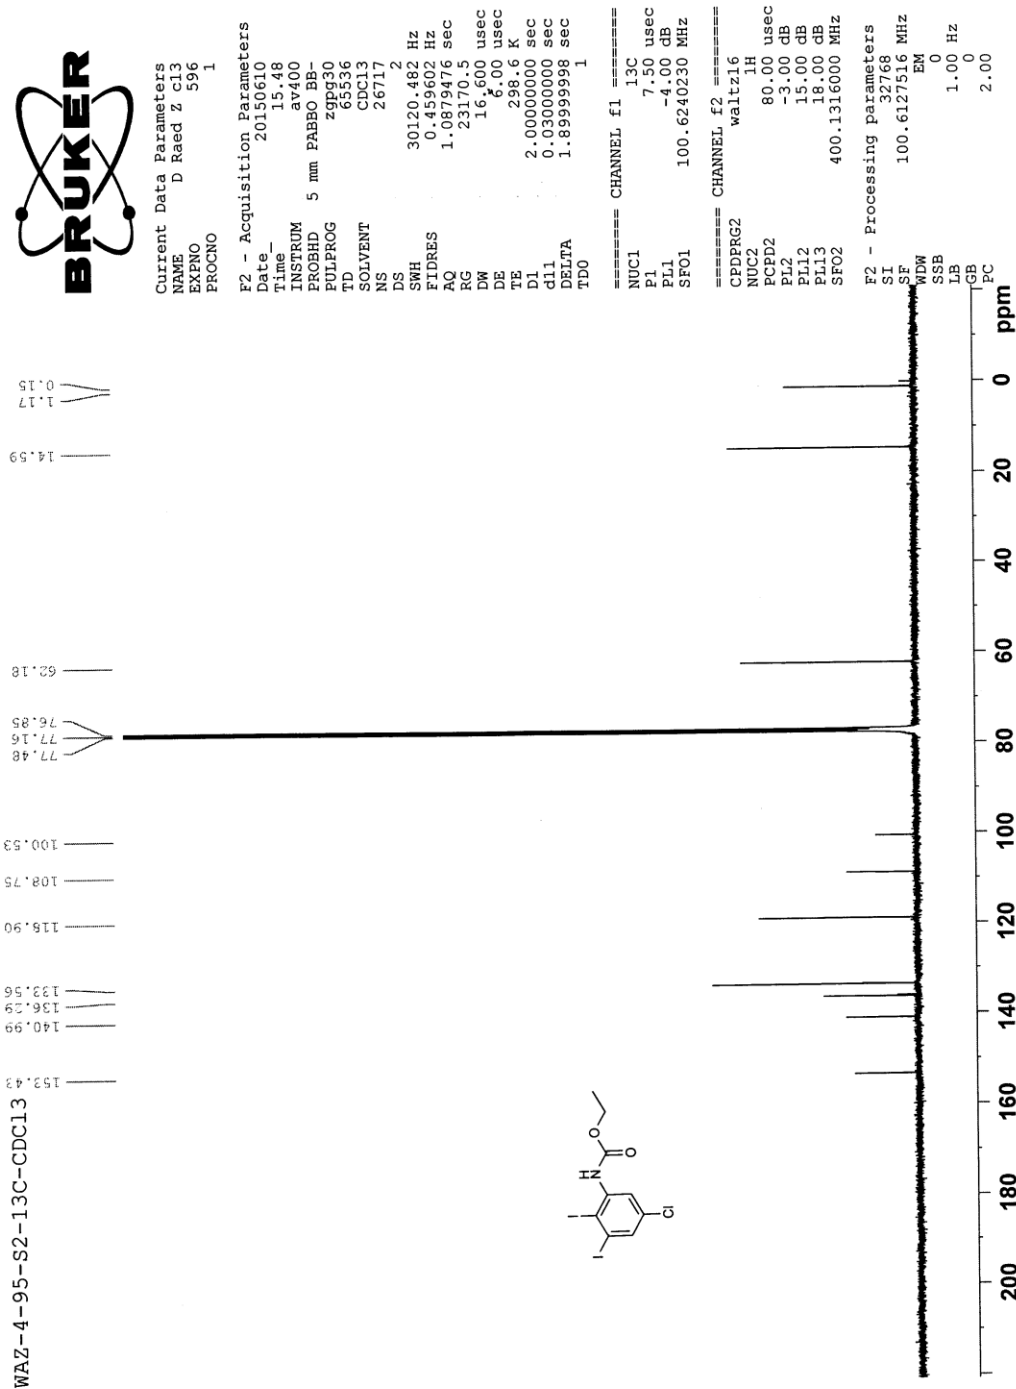

1.5.23  $^1\text{H-NMR}$  of benzyl (5-chloro-2,3-diiodophenyl)carbamate (18A) in  $\text{CDCl}_3$  at 25  $^\circ\text{C}$ .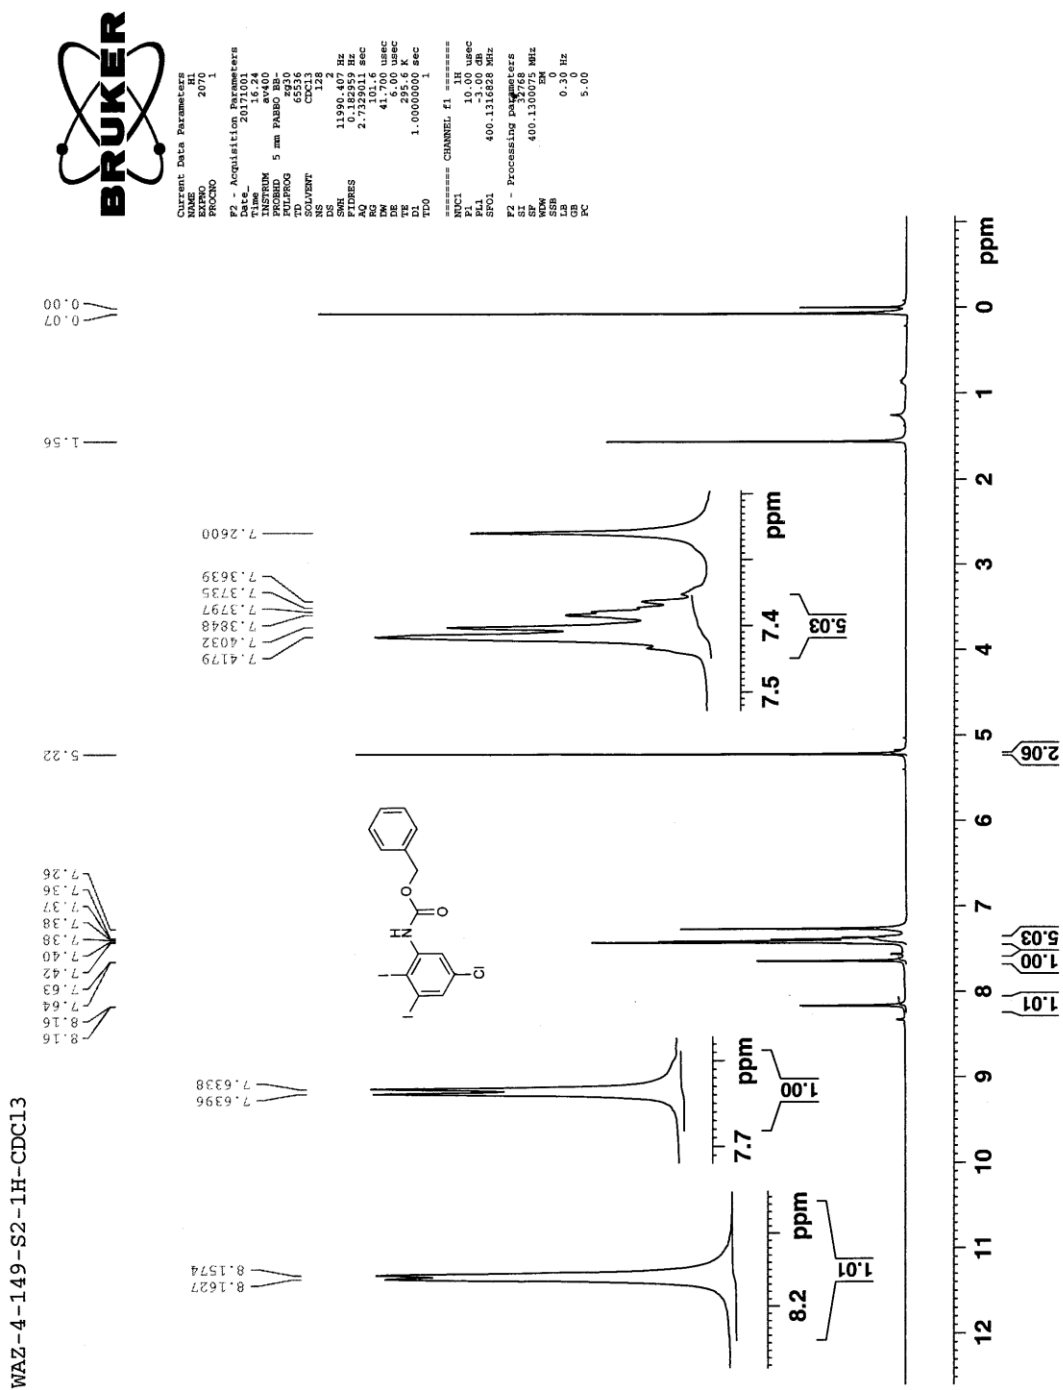

1.5.24 <sup>13</sup>C-NMR of benzyl (5-chloro-2,3-diiodophenyl)carbamate (18A) in CDCl<sub>3</sub> at 25 °C.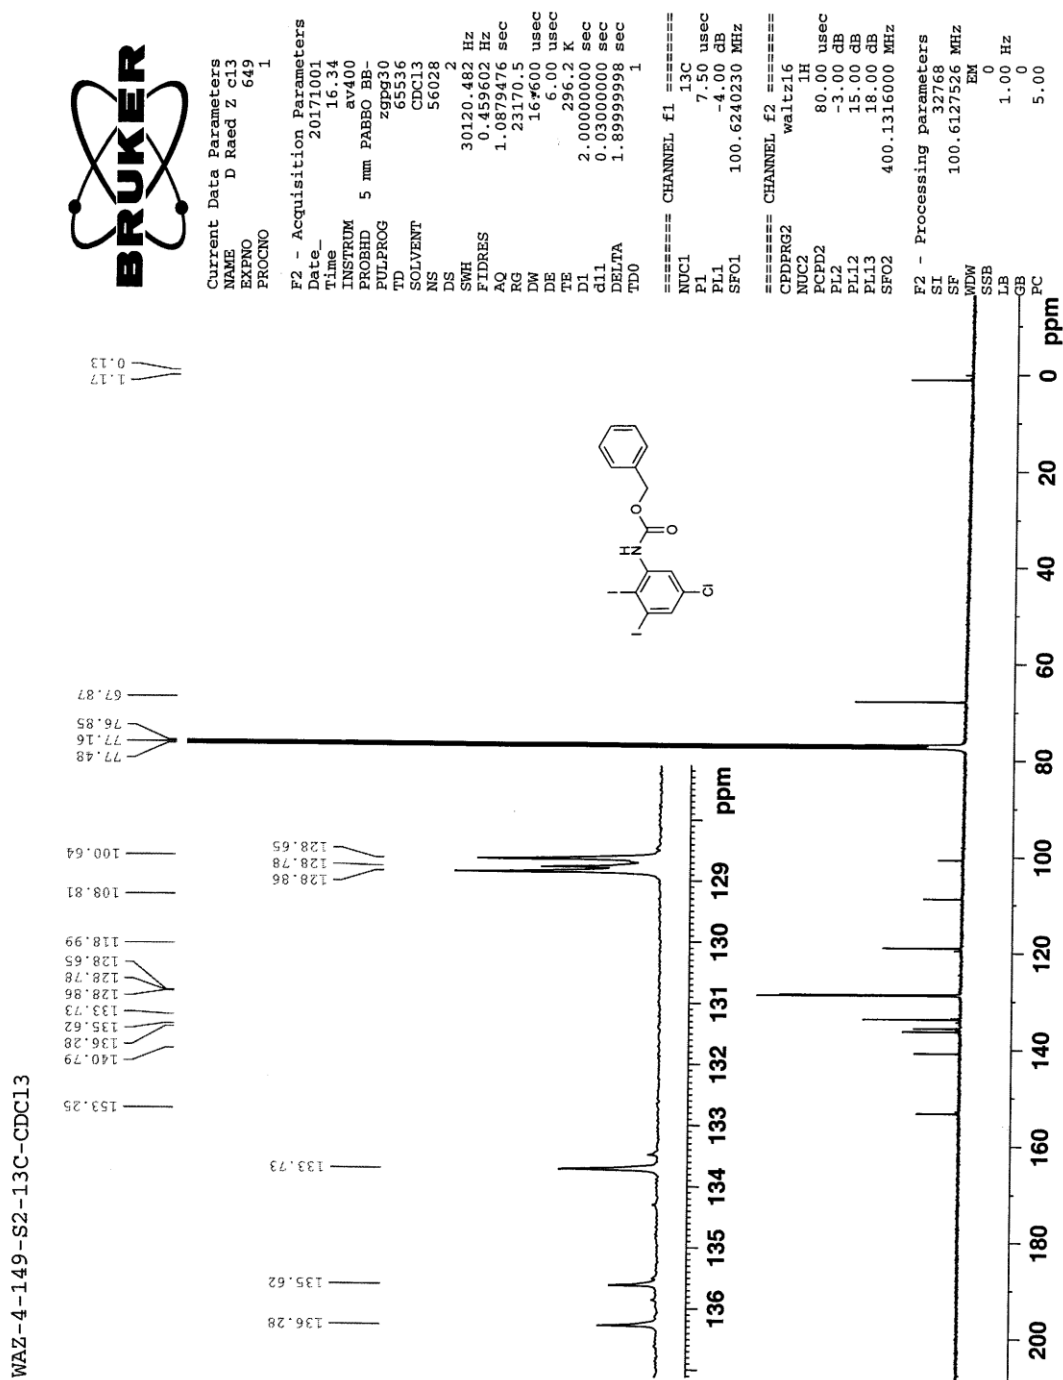

1.5.25  $^1\text{H-NMR}$  of ethyl (5-bromo-2,3-diiodophenyl)carbamate (20A) in  $\text{CDCl}_3$  at  $25^\circ\text{C}$ .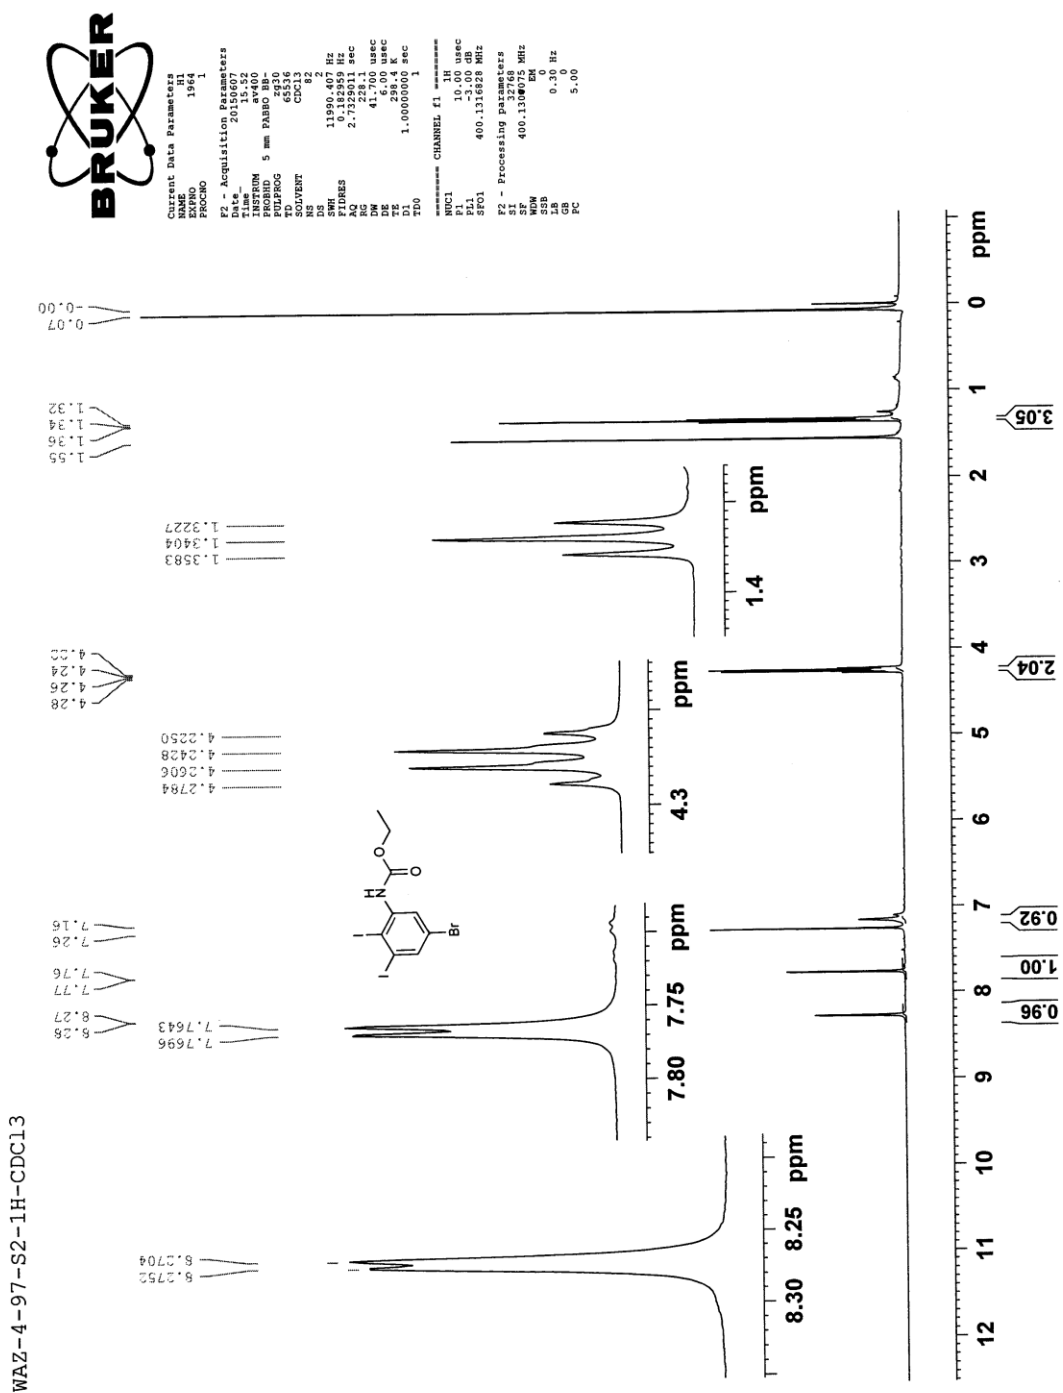

1.5.26  $^{13}\text{C}$ -NMR of ethyl (5-bromo-2,3-diiodophenyl)carbamate (20A) in  $\text{CDCl}_3$  at 25 °C.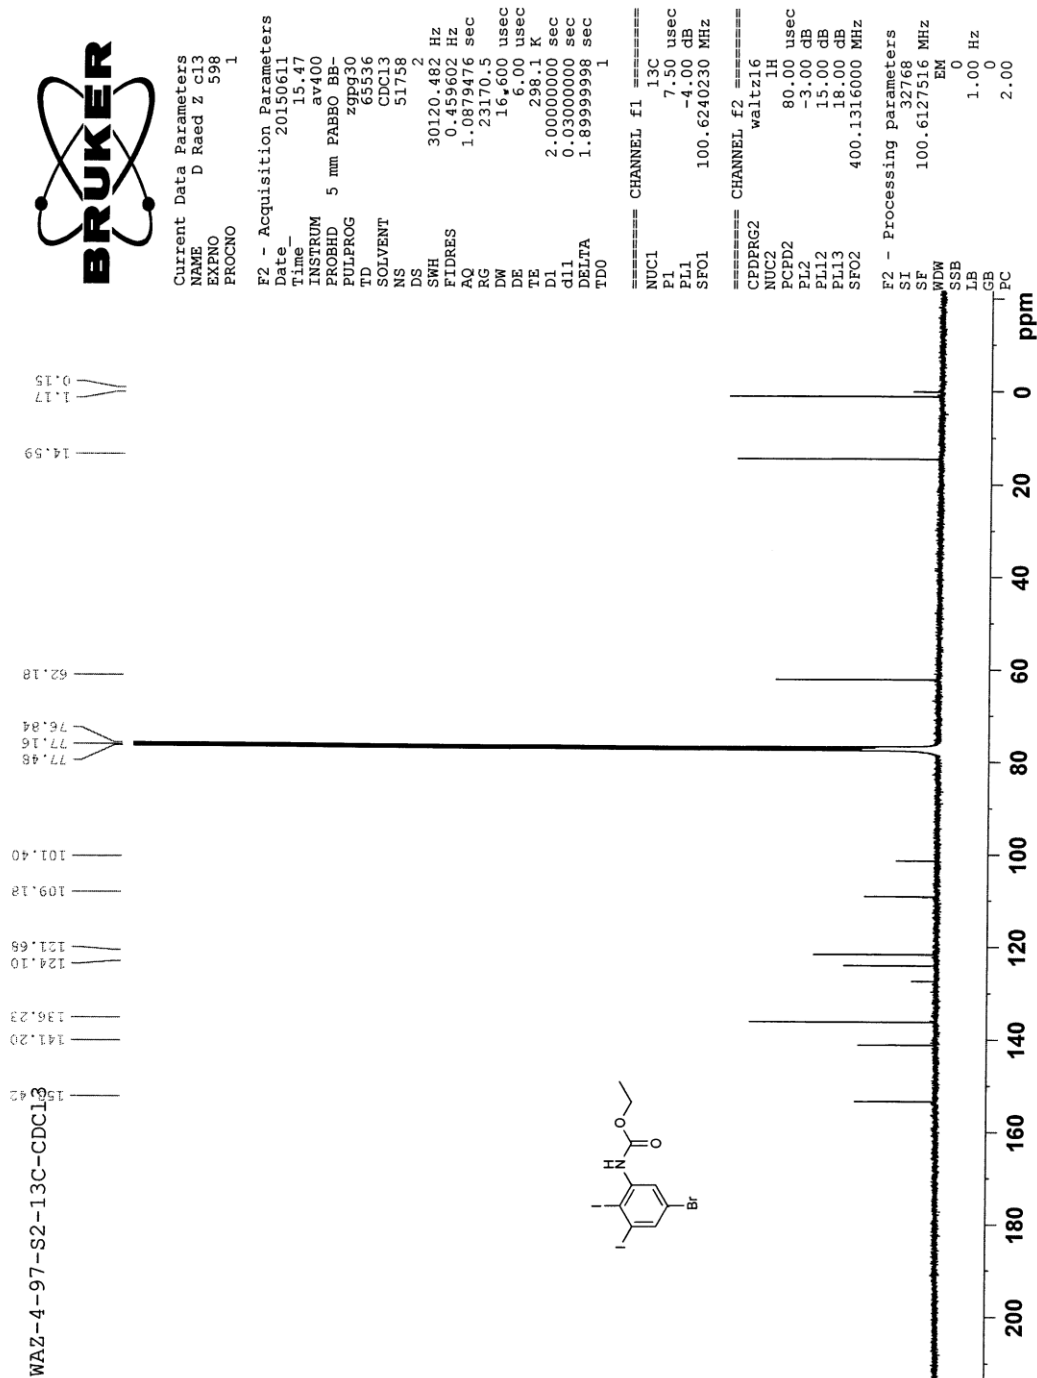

1.5.27 <sup>1</sup>H-NMR of benzyl (5-bromo-2,3-diiodophenyl)carbamate (21A) in CDCl<sub>3</sub> at 25 °C.

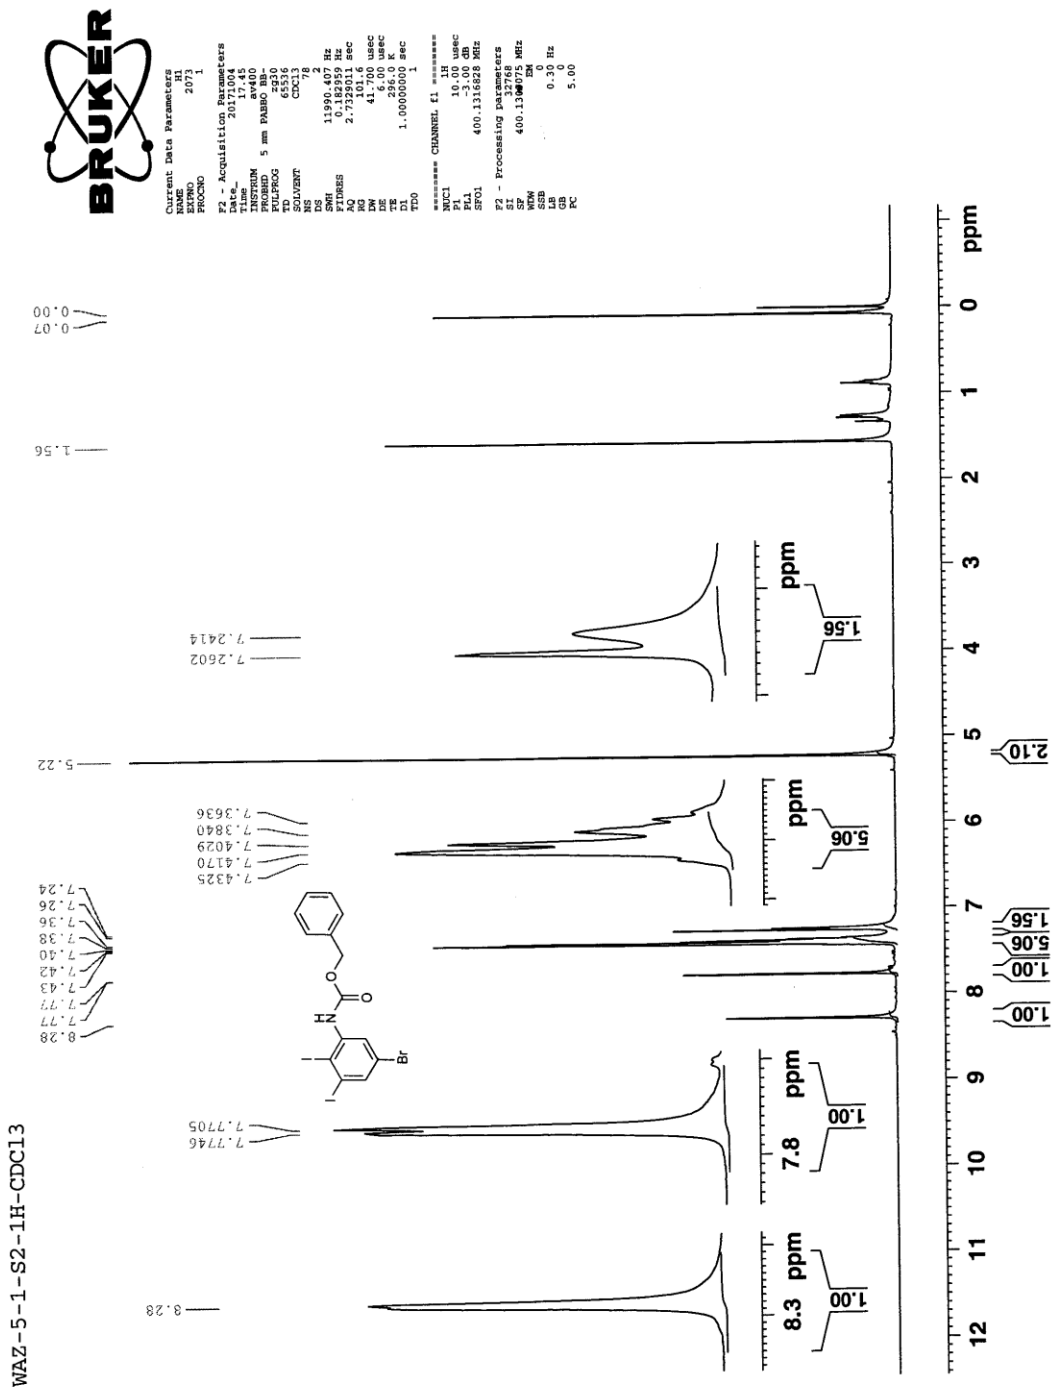

1.5.28  $^{13}\text{C}$ -NMR of benzyl (5-bromo-2,3-diiodophenyl)carbamate (21A) in  $\text{CDCl}_3$  at 25  $^\circ\text{C}$ .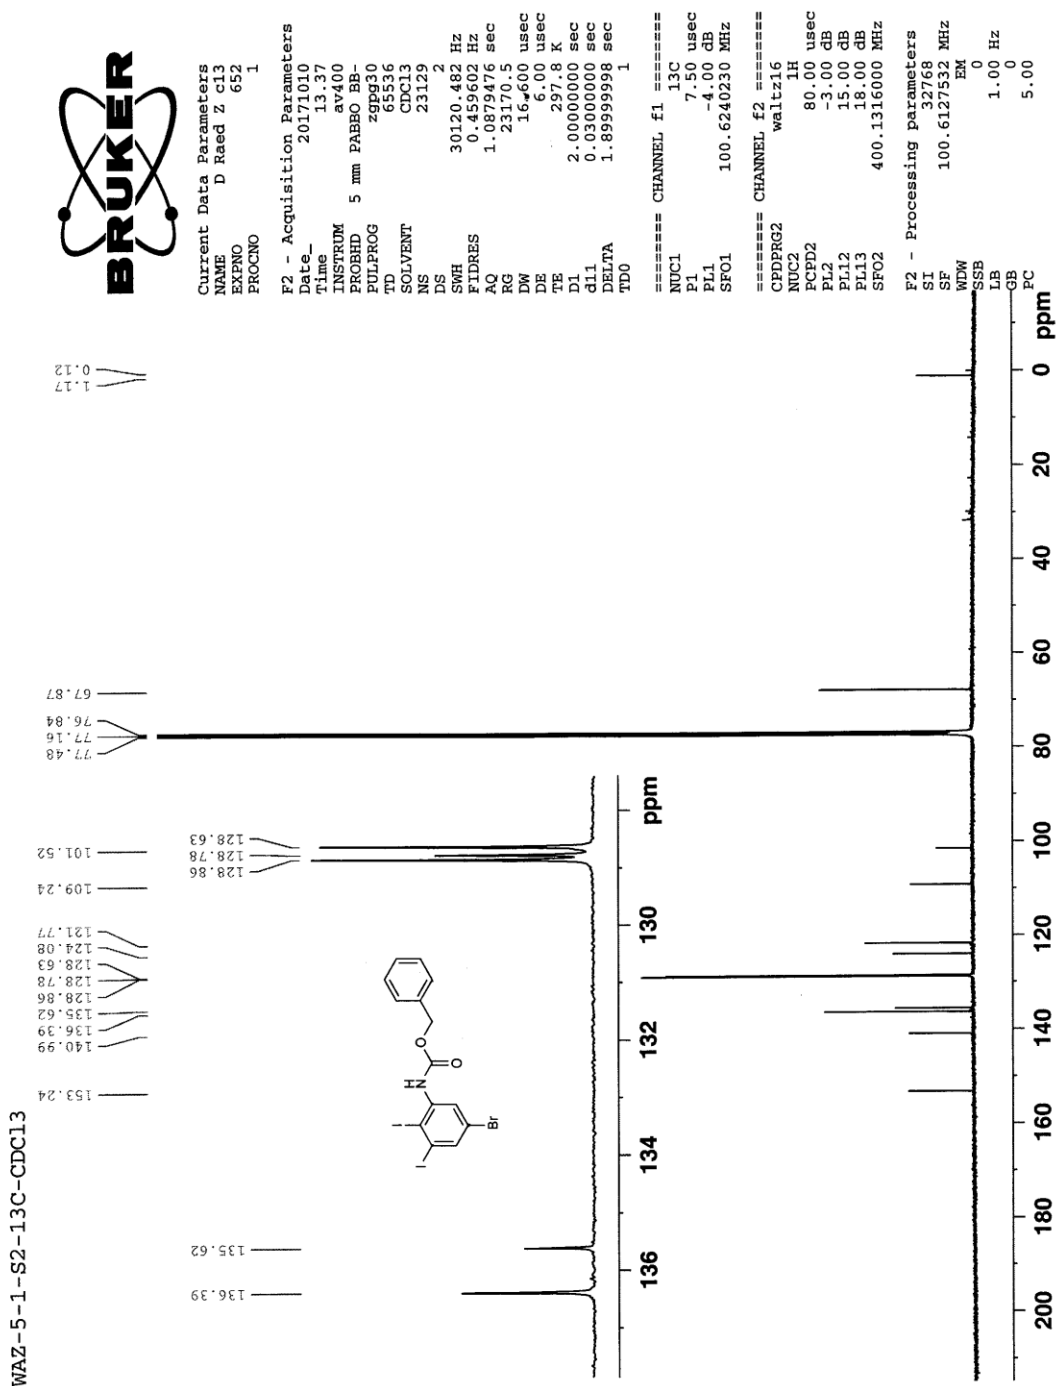

1.5.29 <sup>1</sup>H-NMR of methyl (2,3-diiodo-5-methoxyphenyl)carbamate (22A) in CDCl<sub>3</sub> at 25 °C.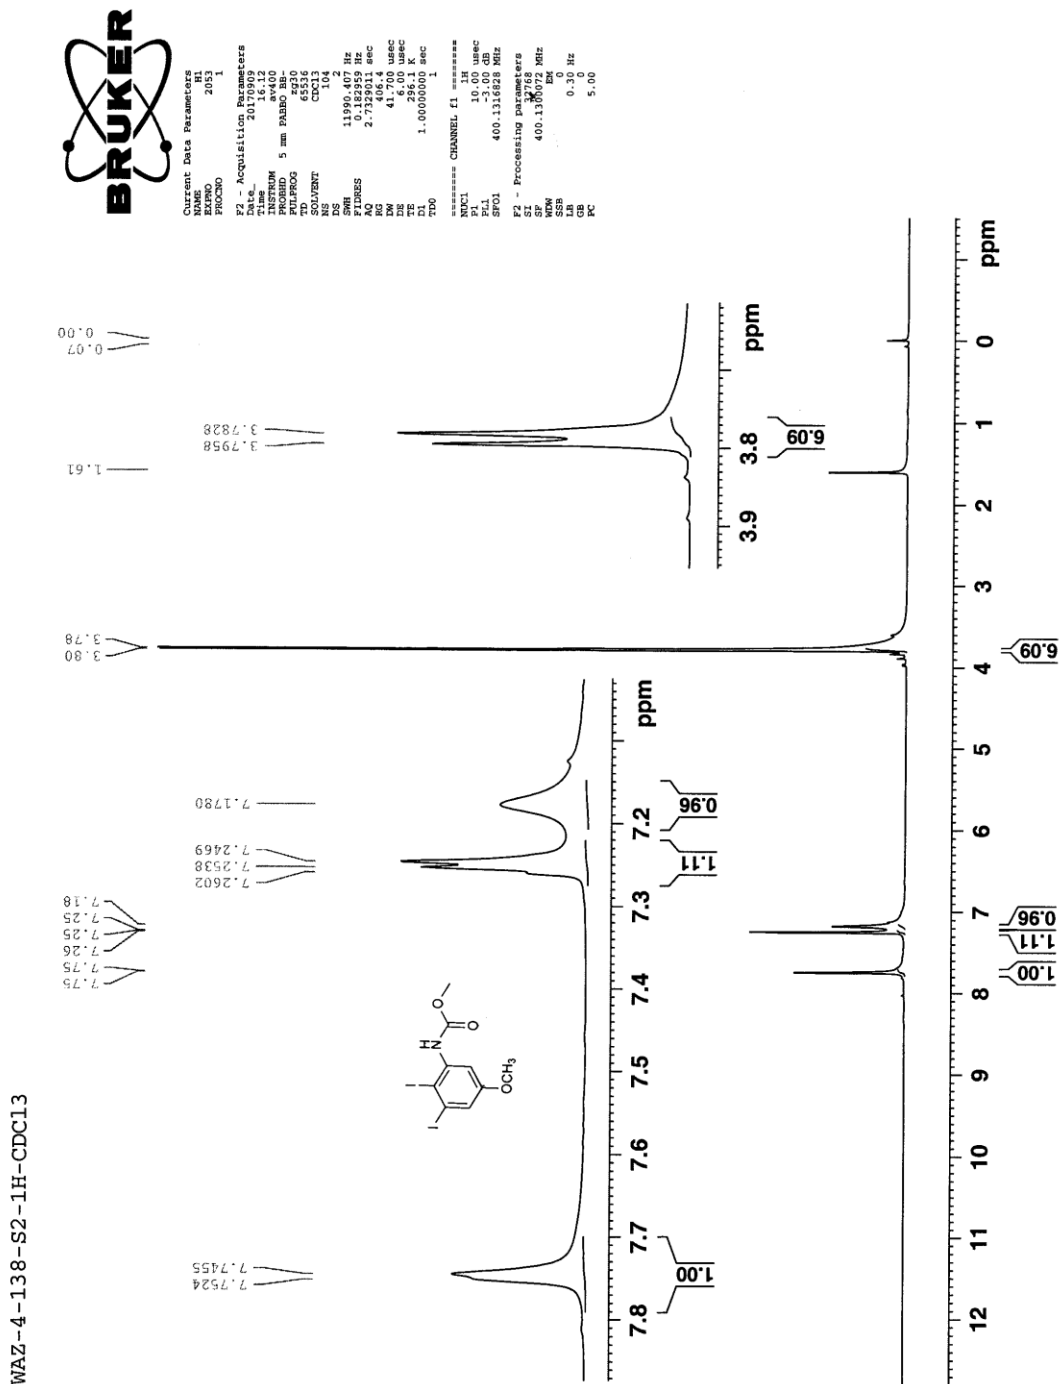



1.5.30 <sup>13</sup>C-NMR of methyl (2,3-diiodo-5-methoxyphenyl)carbamate (22A) in CDCl<sub>3</sub> at 25 °C.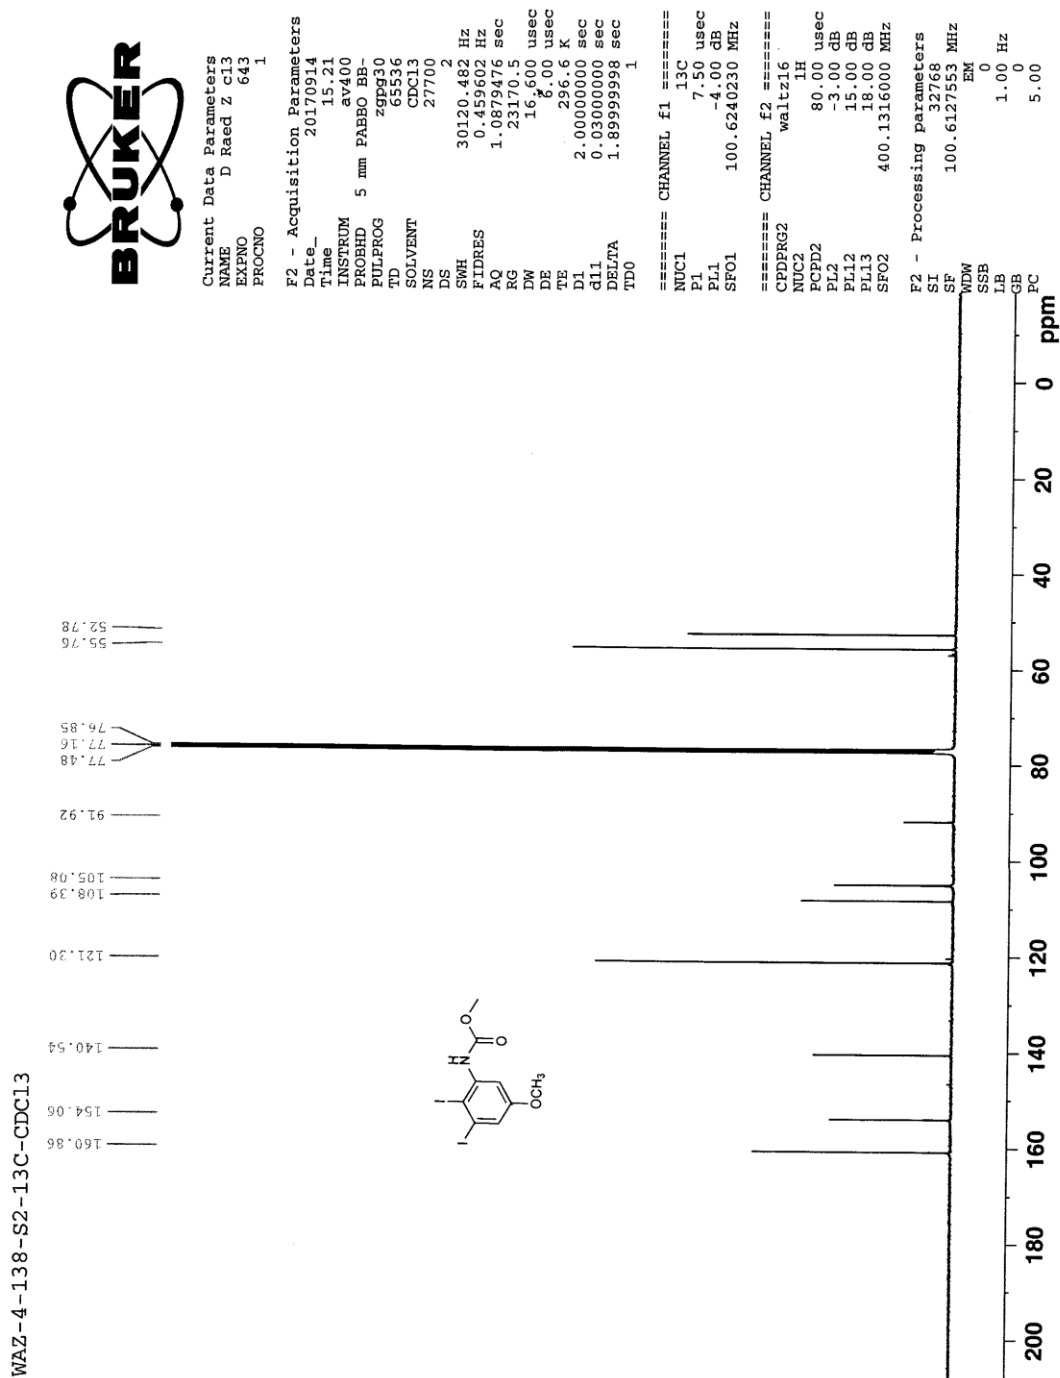

1.5.31  $^1\text{H-NMR}$  of ethyl (2,3-diiodo-5-methoxyphenyl)carbamate (23A) in  $\text{CDCl}_3$  at 25  $^\circ\text{C}$ .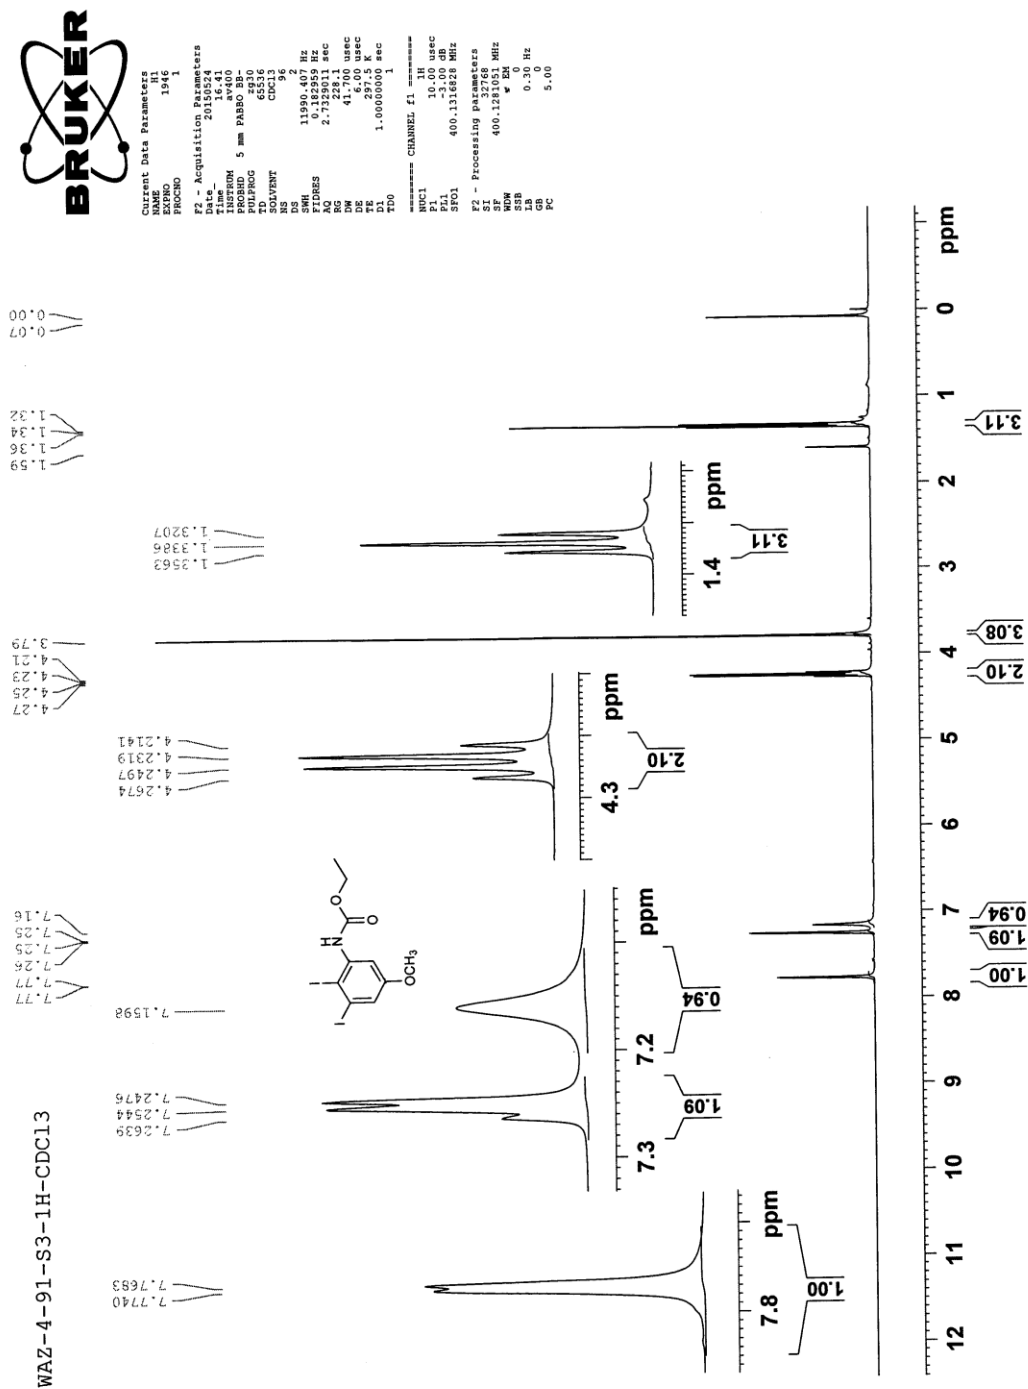

1.5.32  $^{13}\text{C}$ -NMR of ethyl (2,3-diiodo-5-methoxyphenyl)carbamate (23A) in  $\text{CDCl}_3$  at 25  $^\circ\text{C}$ .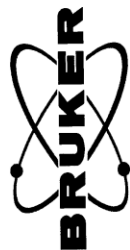

Current Data Parameters  
 NAME D Raed Z c13  
 EXPNO 583  
 PROCNO 1

F2 - Acquisition Parameters  
 Date\_ 20150524  
 Time\_ 16:57  
 INSTRUM av400  
 PROBHD 5 mm PABBO BB-  
 PULPROG zgpg30  
 TD 65536  
 SOLVENT CDCl3  
 NS 18598  
 DS 2  
 SWH 30120.482 Hz  
 FIDRES 0.459602 Hz  
 AQ 1.0879476 sec  
 RG 23170.5  
 DW 16.600 usec  
 DE 6.00 usec  
 TE 298.0 K  
 D1 2.00000000 sec  
 d11 0.03000000 sec  
 DELTA 1.89999998 sec  
 TDO 1

==== CHANNEL f1 =====  
 NUC1  $^{13}\text{C}$   
 P1 7.50 usec  
 PL1 -4.00 dB  
 SF01 100.6240230 MHz

==== CHANNEL f2 =====  
 CPDPRG2 waltz16  
 NUC2  $^1\text{H}$   
 PCPD2 80.00 usec  
 PL2 -3.00 dB  
 PL12 15.00 dB  
 PL13 18.00 dB  
 SF02 400.1316000 MHz

F2 - Processing parameters  
 SI 32768  
 SF 100.6122755 MHz  
 EN 0  
 WDW 0  
 SSB 1.00 Hz  
 LB 0  
 GB 0  
 PC 2.00

WAZ-4-91-S3-13C-CDCl3

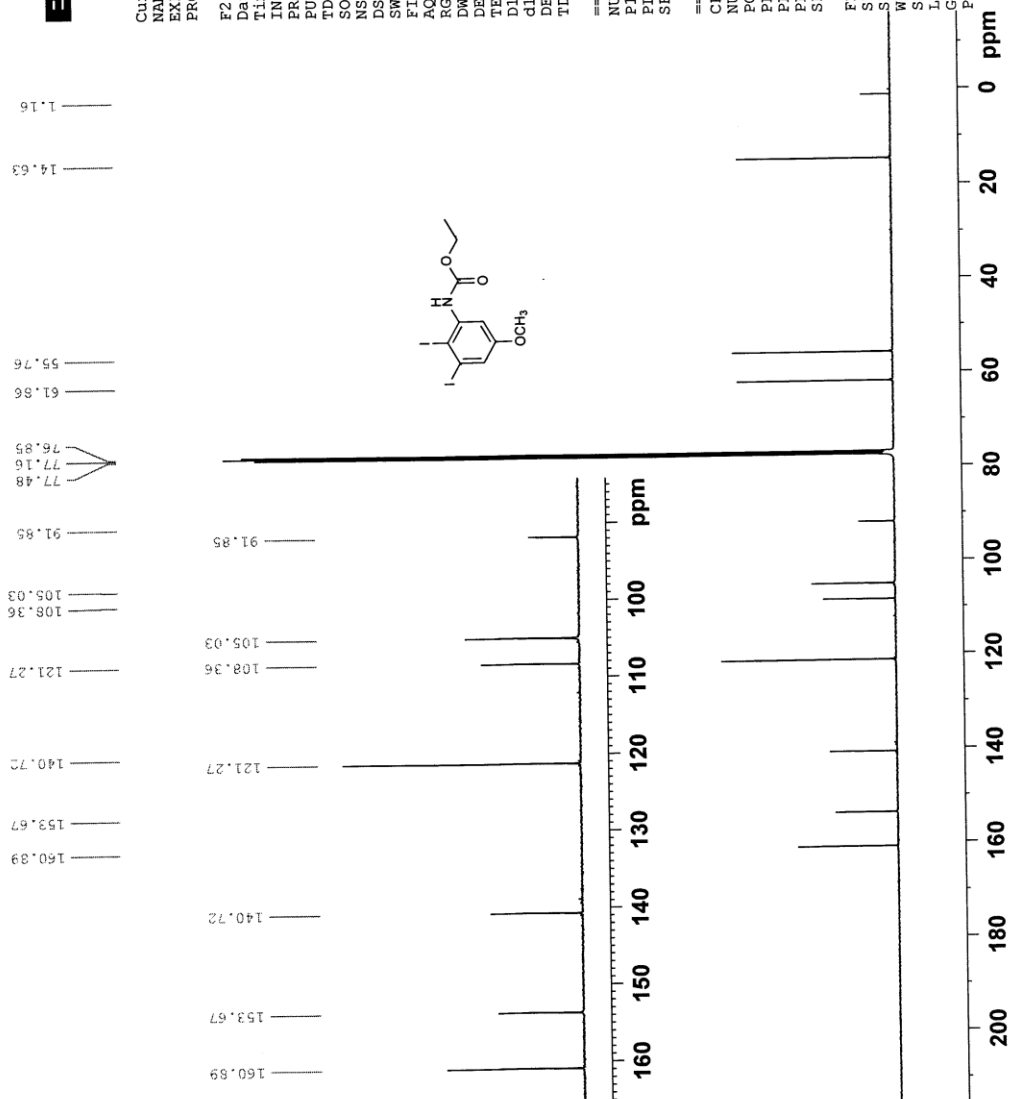

1.5.33  $^1\text{H-NMR}$  of benzyl (2,3-diiodo-5-methoxyphenyl)carbamate (24A) in  $\text{CDCl}_3$  at 25  $^\circ\text{C}$ .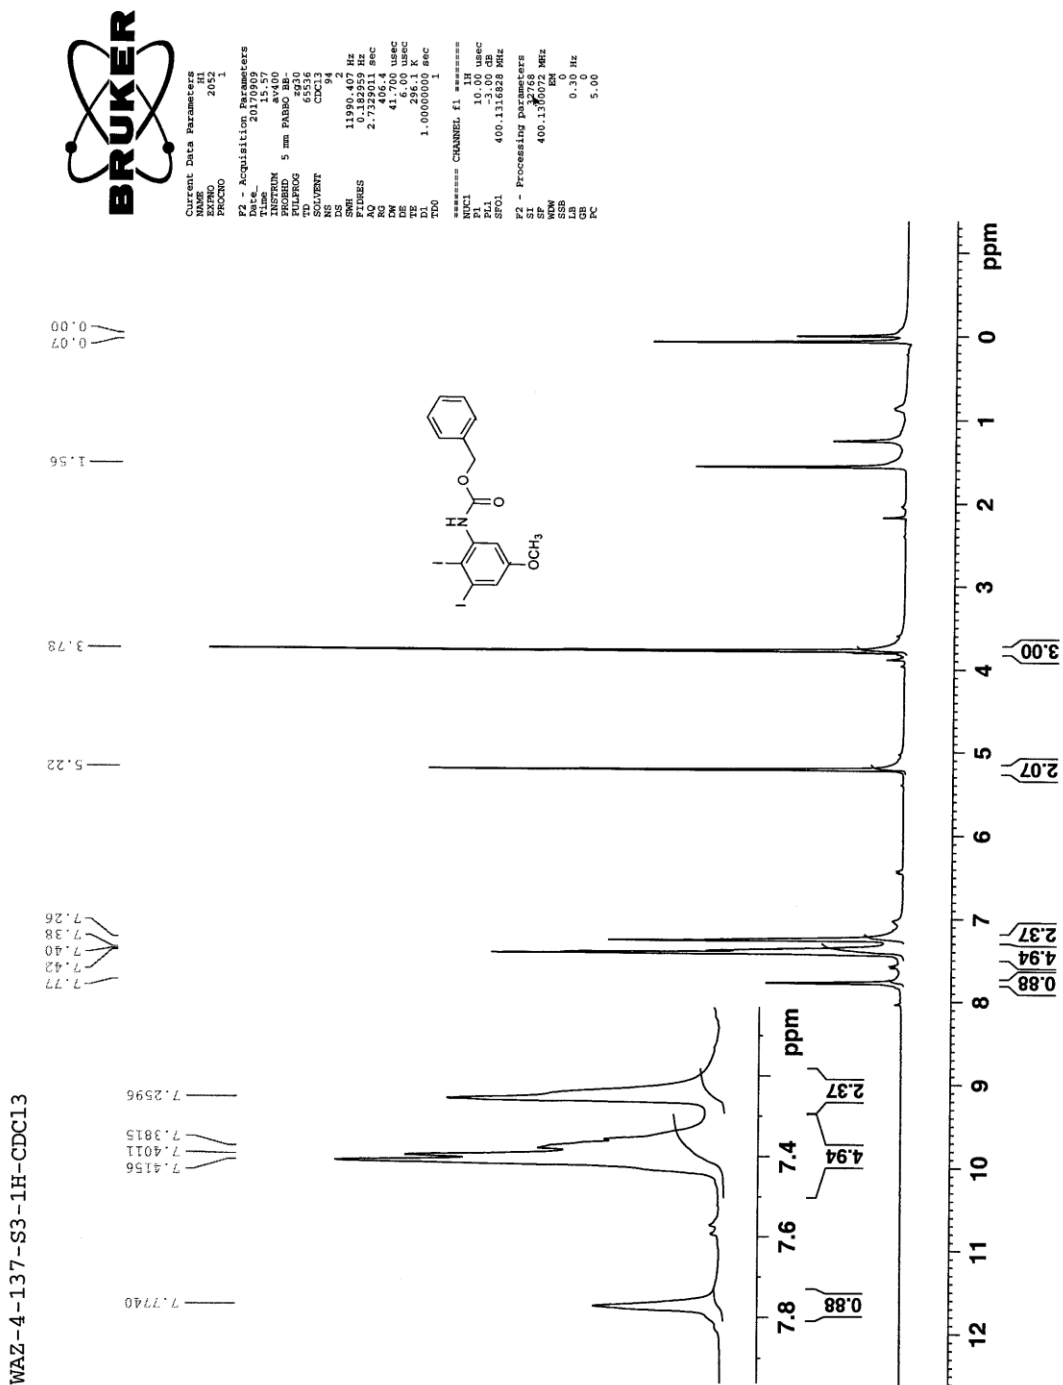

1.5.34  $^{13}\text{C}$ -NMR of benzyl (2,3-diiodo-5-methoxyphenyl)carbamate (24<sub>A</sub>) in  $\text{CDCl}_3$  at 25 °C.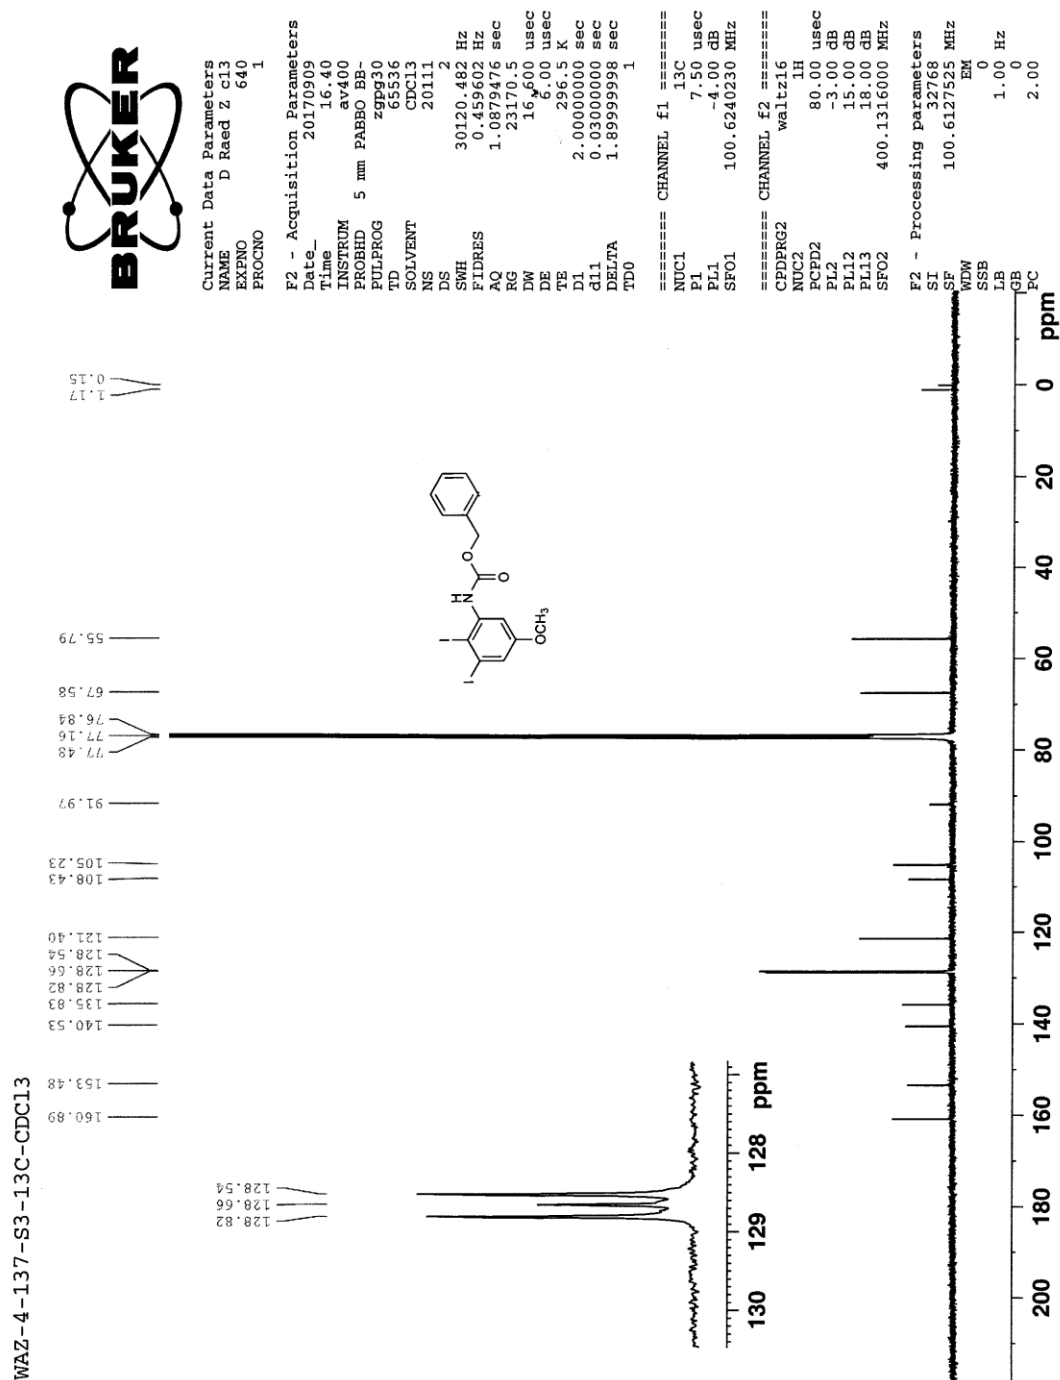

1.5.35  $^1\text{H-NMR}$  of *tert*-butyl (2,3-diiodo-5-methoxyphenyl)carbamate (26A) in  $\text{CDCl}_3$  at  $25^\circ\text{C}$ .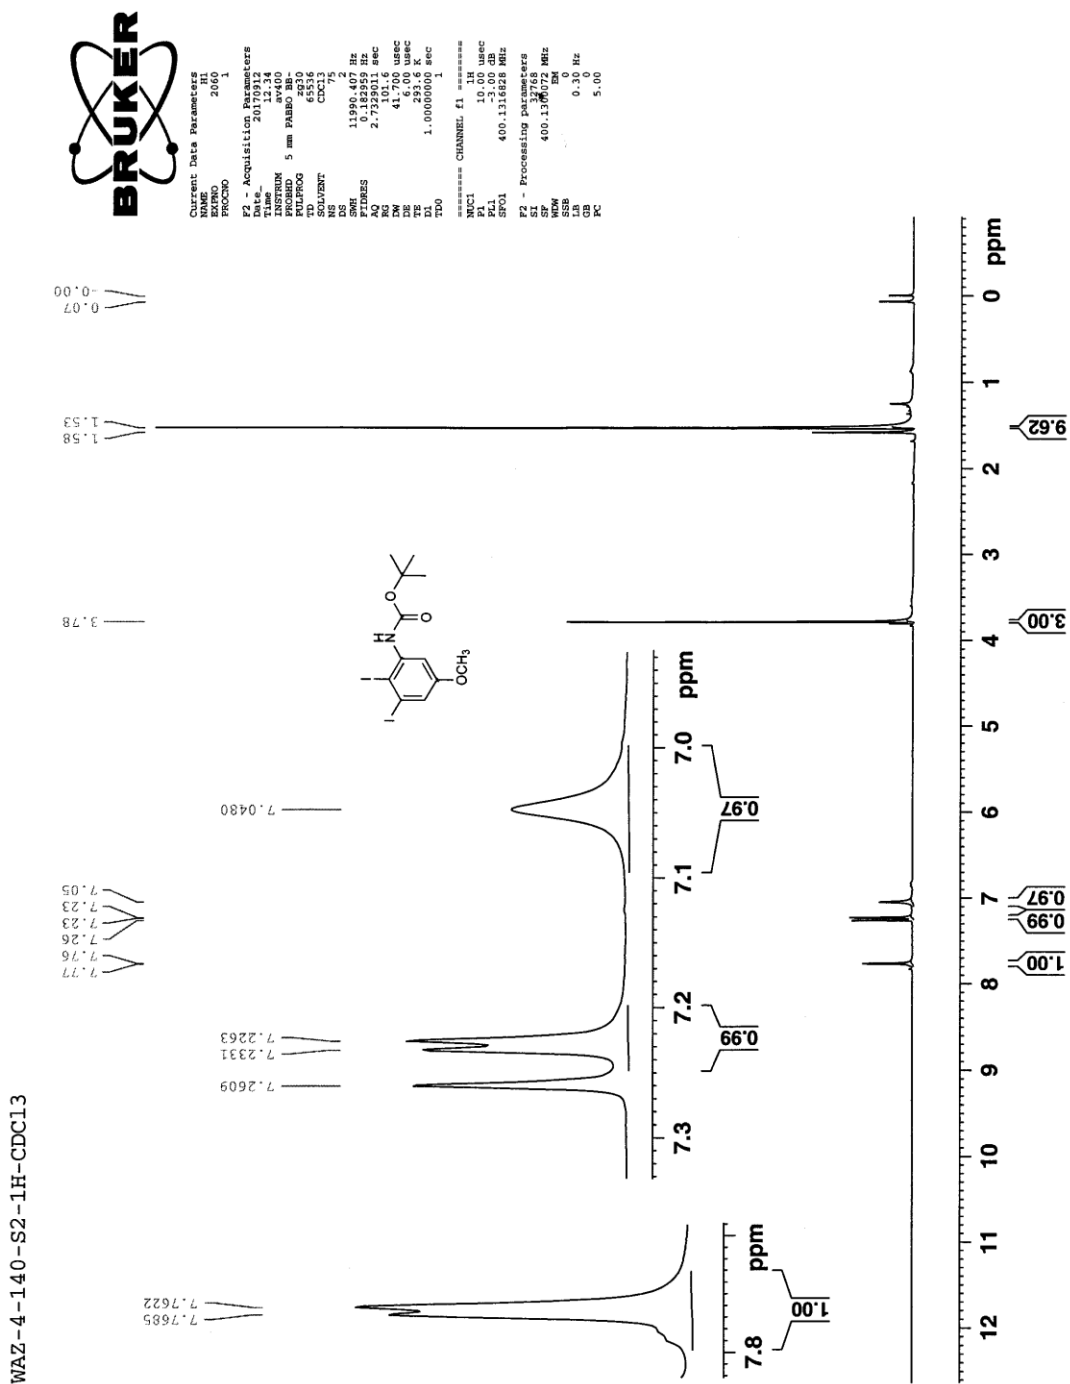

**1.5.36  $^{13}\text{C}$ -NMR of tert-butyl (2,3-diiodo-5-methoxyphenyl)carbamate (26A) in  $\text{CDCl}_3$  at 25  $^\circ\text{C}$ .**

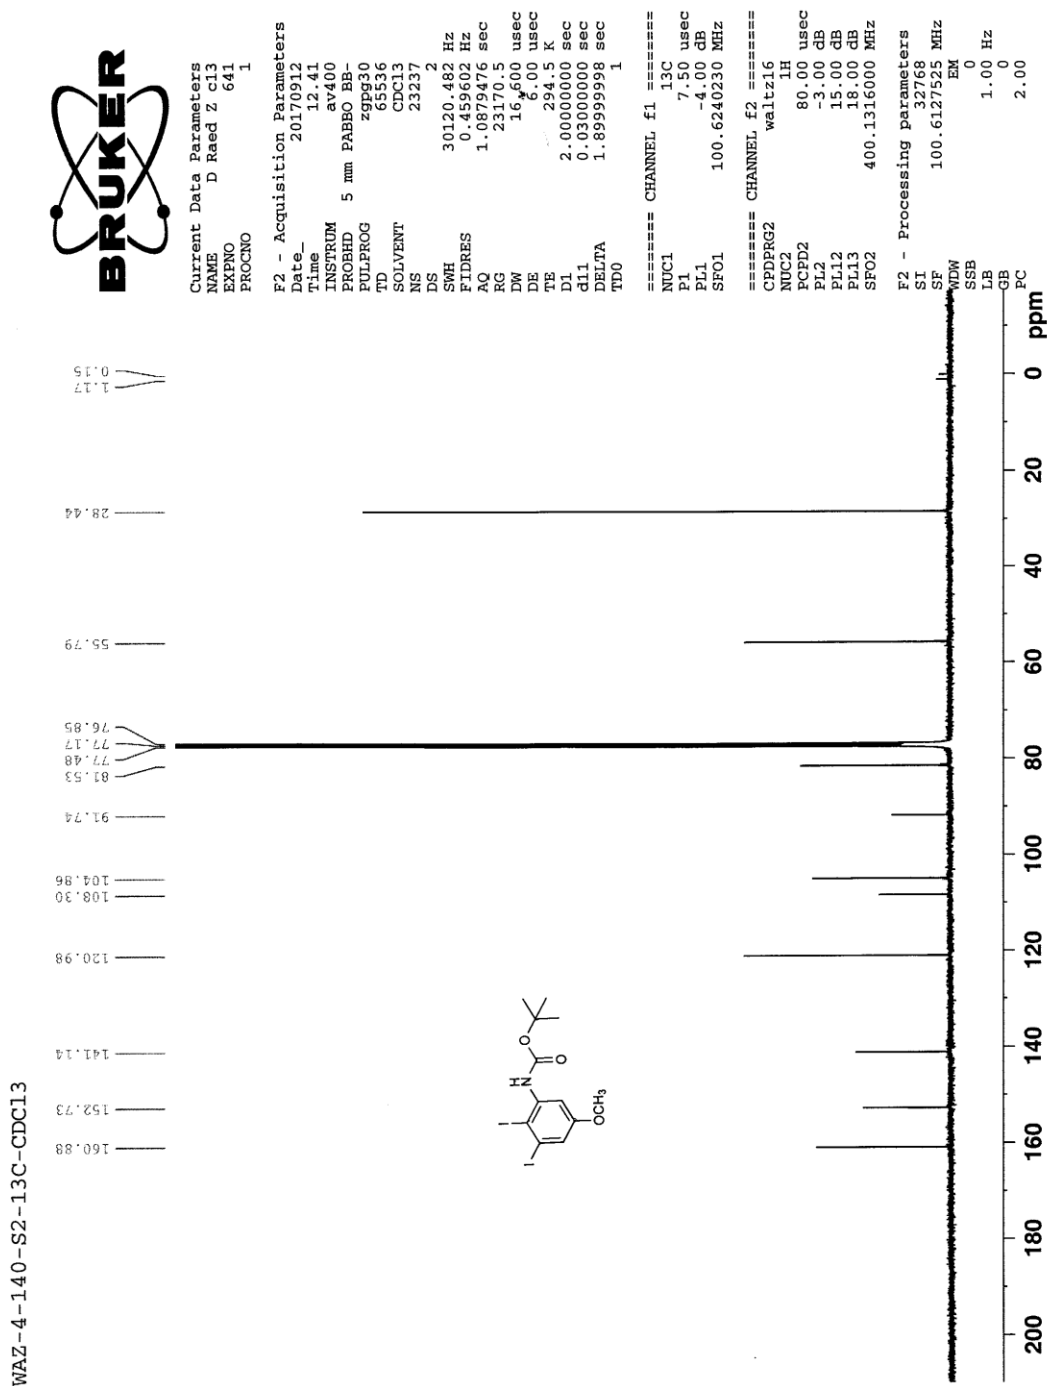

1.5.37  $^1\text{H-NMR}$  of methyl 3-((ethoxycarbonyl)amino)-4,5-diiodobenzoate (27A) in  $\text{CDCl}_3$  at 25  $^\circ\text{C}$ .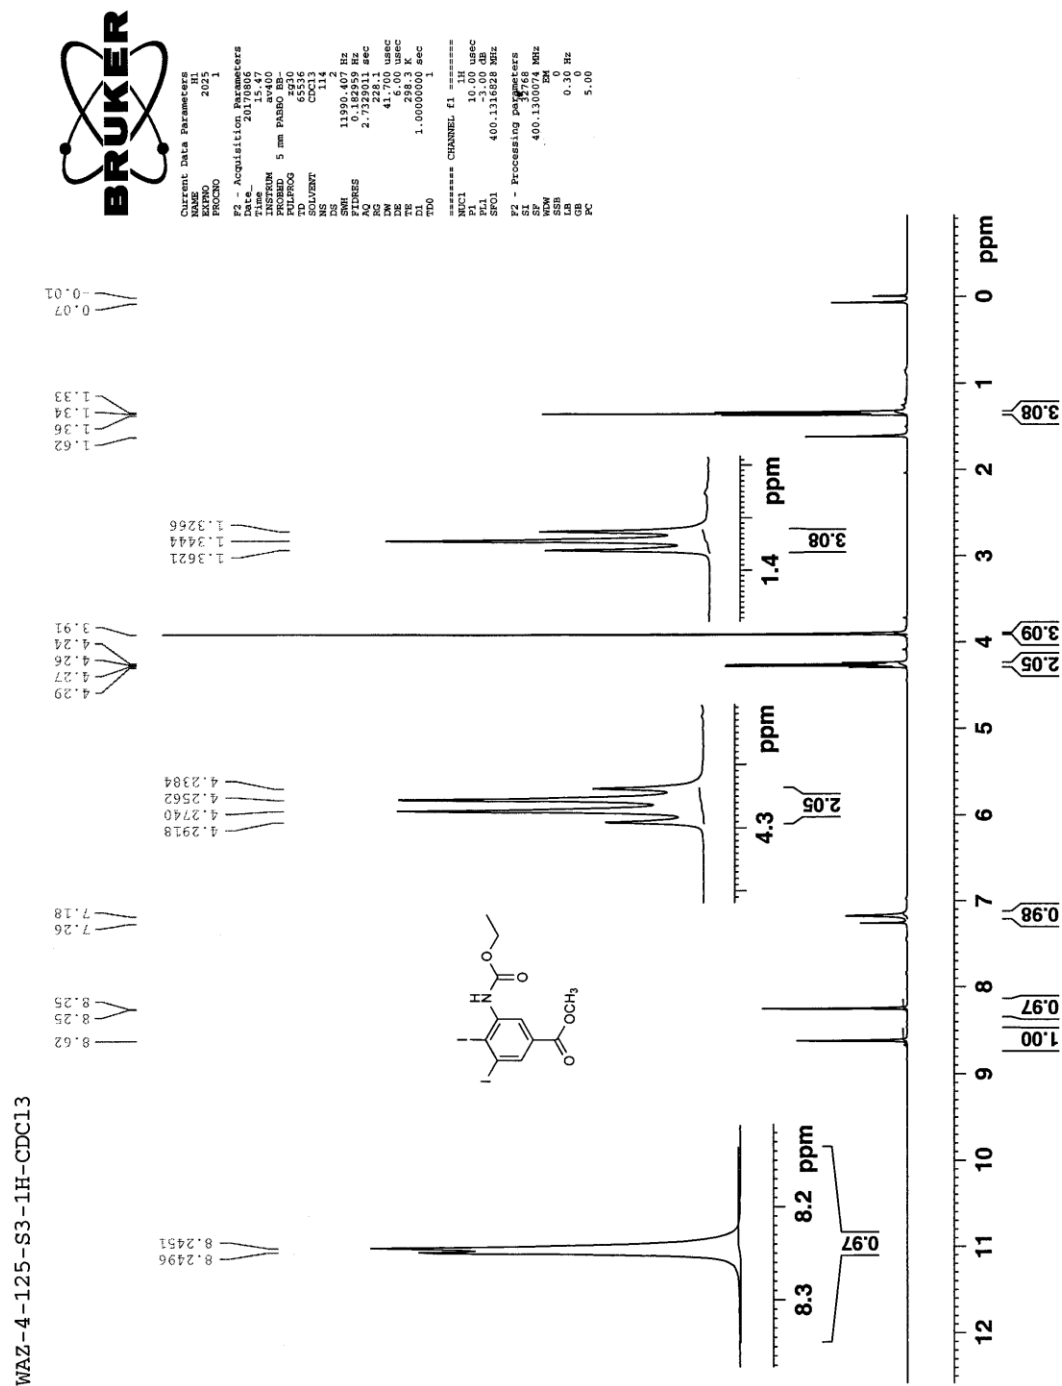



1.5.38  $^{13}\text{C}$ -NMR of methyl 3-((ethoxycarbonyl)amino)-4,5-diiodobenzoate (27A) in  $\text{CDCl}_3$  at 25  $^\circ\text{C}$ .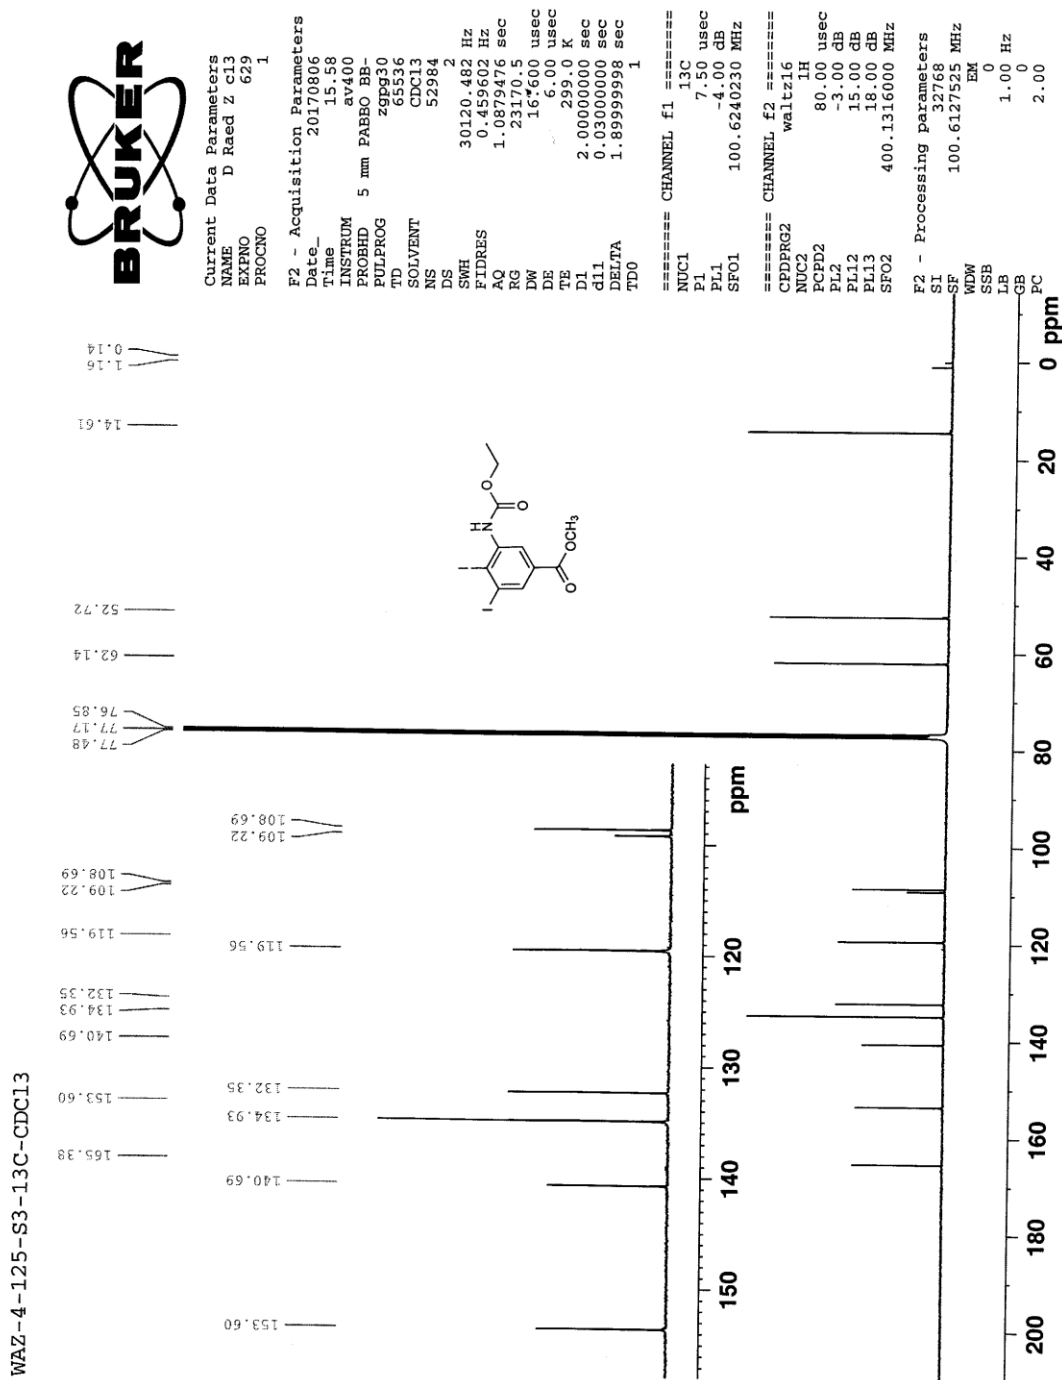

1.5.39 <sup>1</sup>H-NMR of ethyl (3-bromo-2-iodophenyl)carbamate (28A) in CDCl<sub>3</sub> at 25 °C.

WAZ-4-126-S2-1H-CDCl3

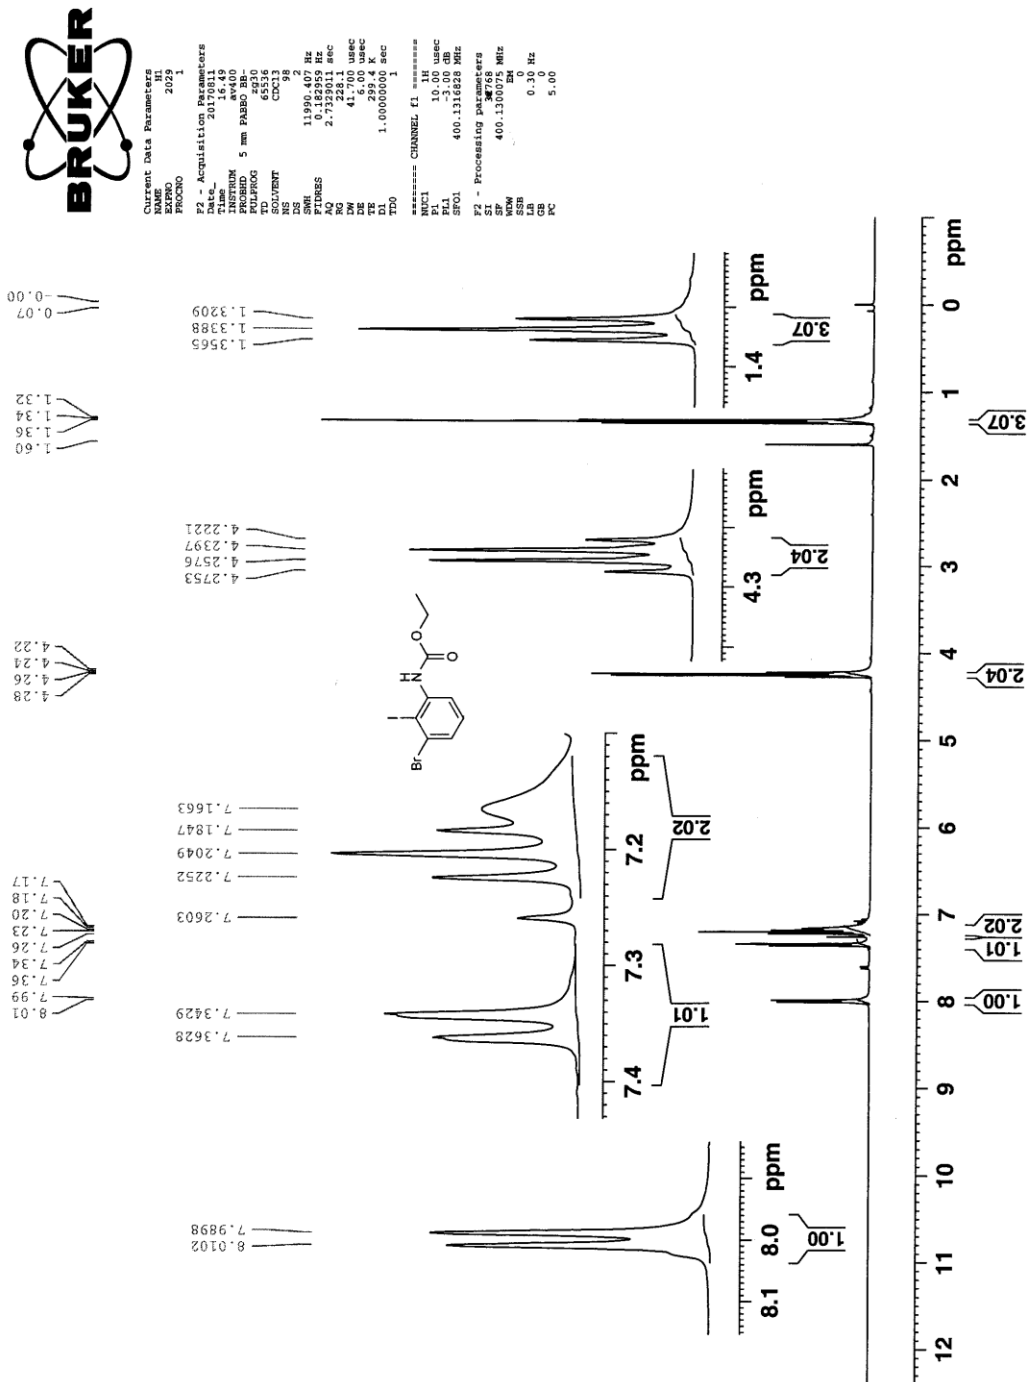

1.5.40 <sup>13</sup>C-NMR of ethyl (3-bromo-2-iodophenyl)carbamate (28A) in CDCl<sub>3</sub> at 25 °C.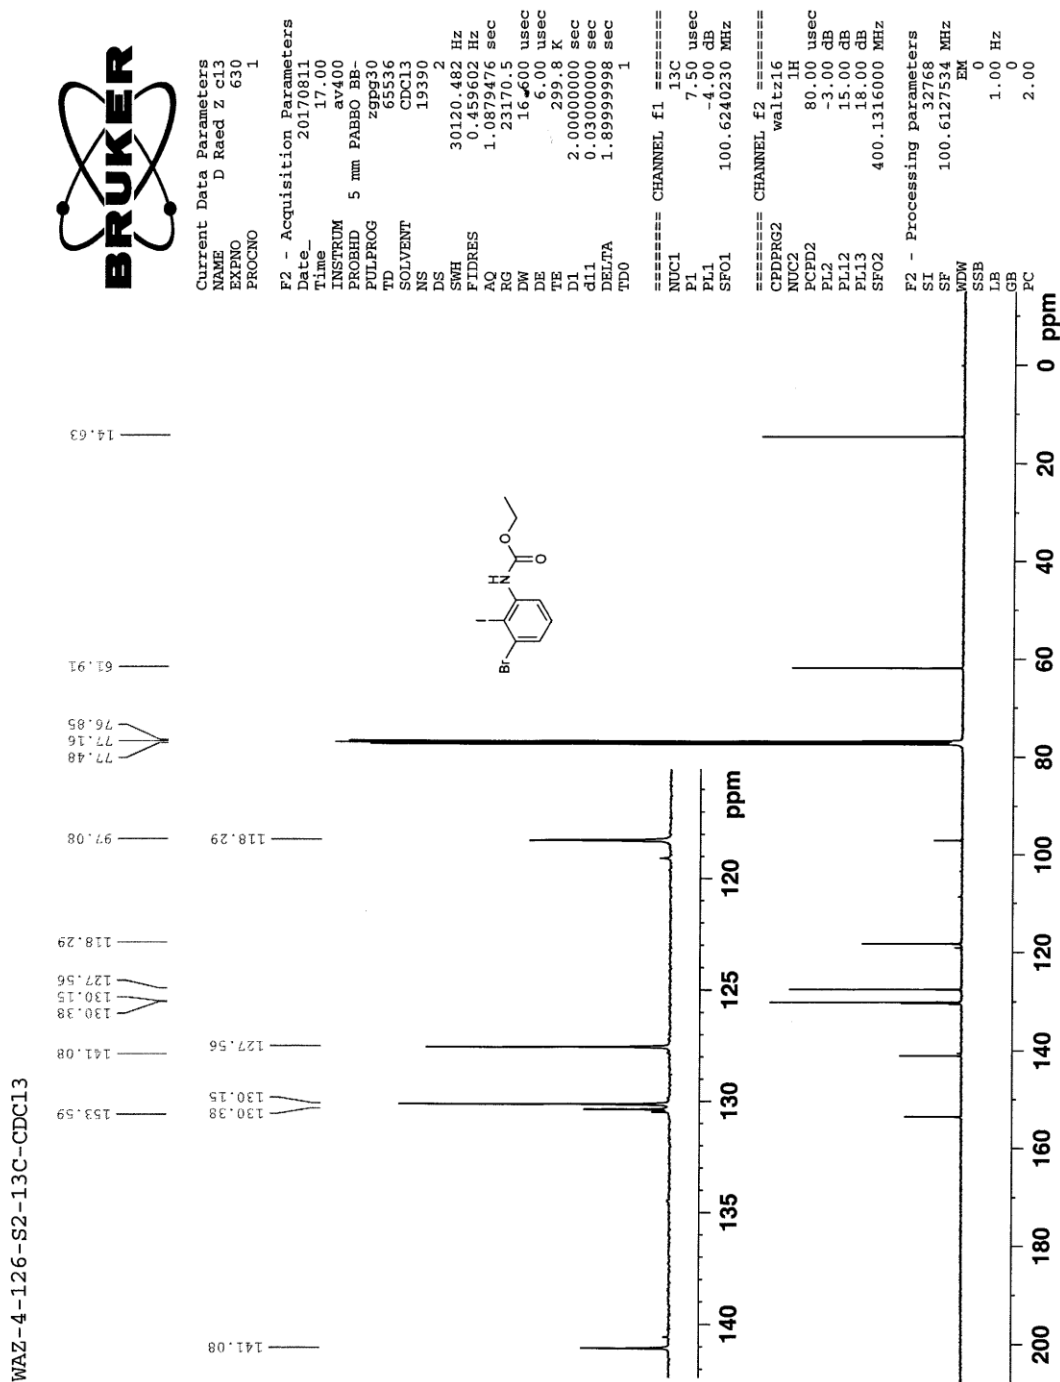

1.5.41 <sup>1</sup>H-NMR of ethyl (3-chloro-2-iodophenyl)carbamate (29A) in CDCl<sub>3</sub> at 25 °C.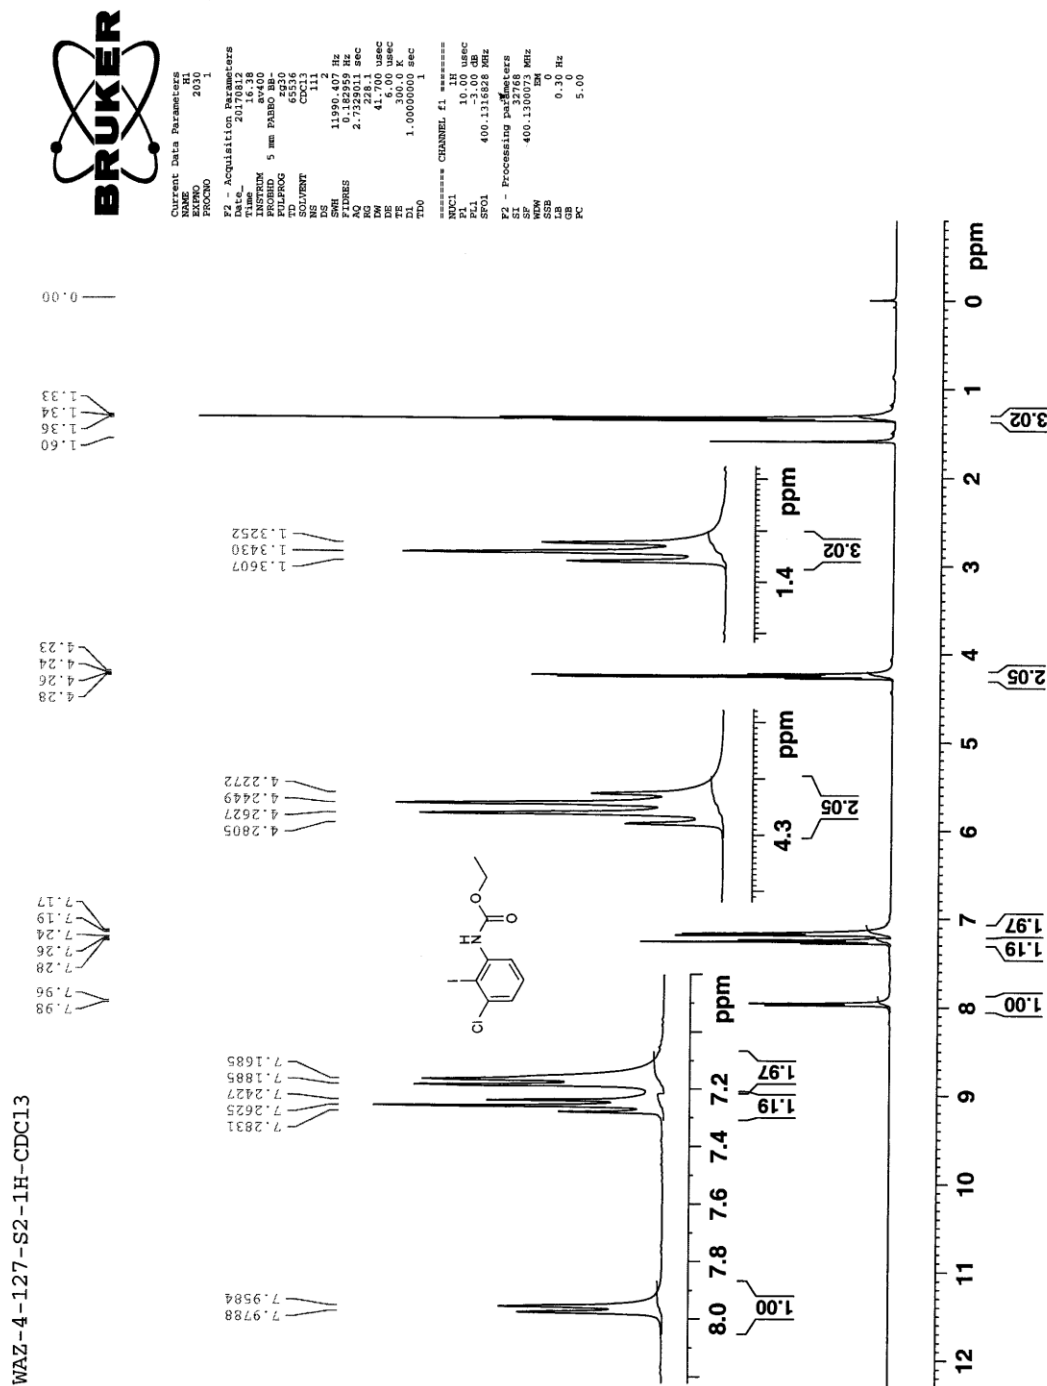

1.5.42  $^{13}\text{C}$ -NMR of ethyl (3-chloro-2-iodophenyl)carbamate (29<sub>A</sub>) in  $\text{CDCl}_3$  at 25 °C.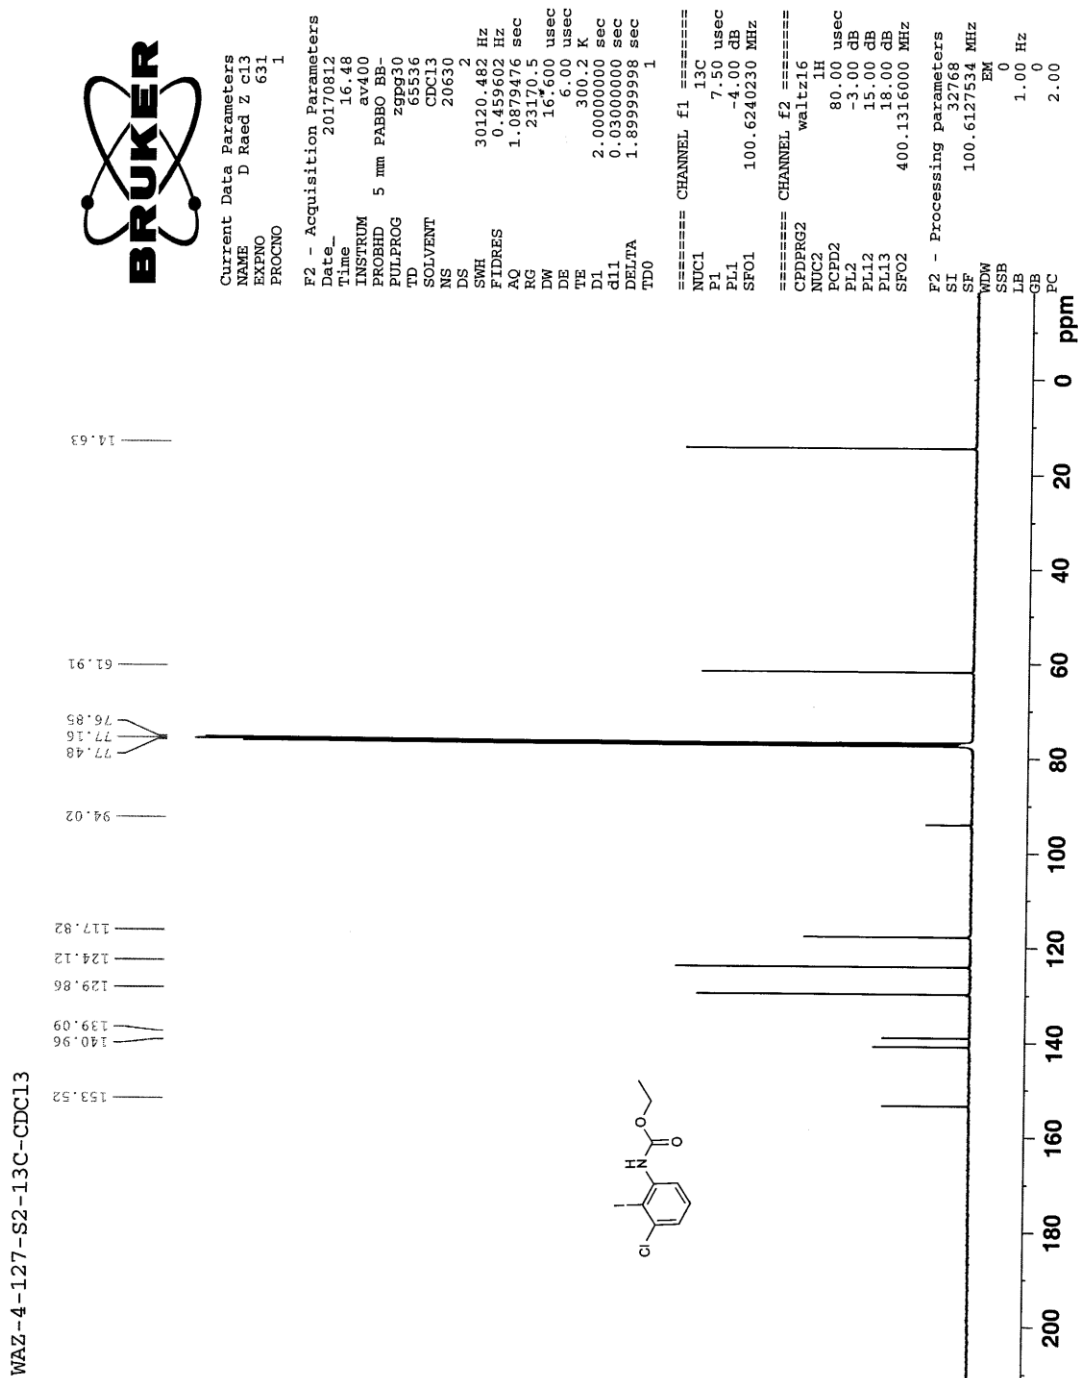

1.5.43  $^1\text{H-NMR}$  of benzyl (5-chloro-3-iodo-2-((4-methoxyphenyl)ethynyl)phenyl)-carbamate (34) in  $\text{CDCl}_3$  at  $25^\circ\text{C}$ .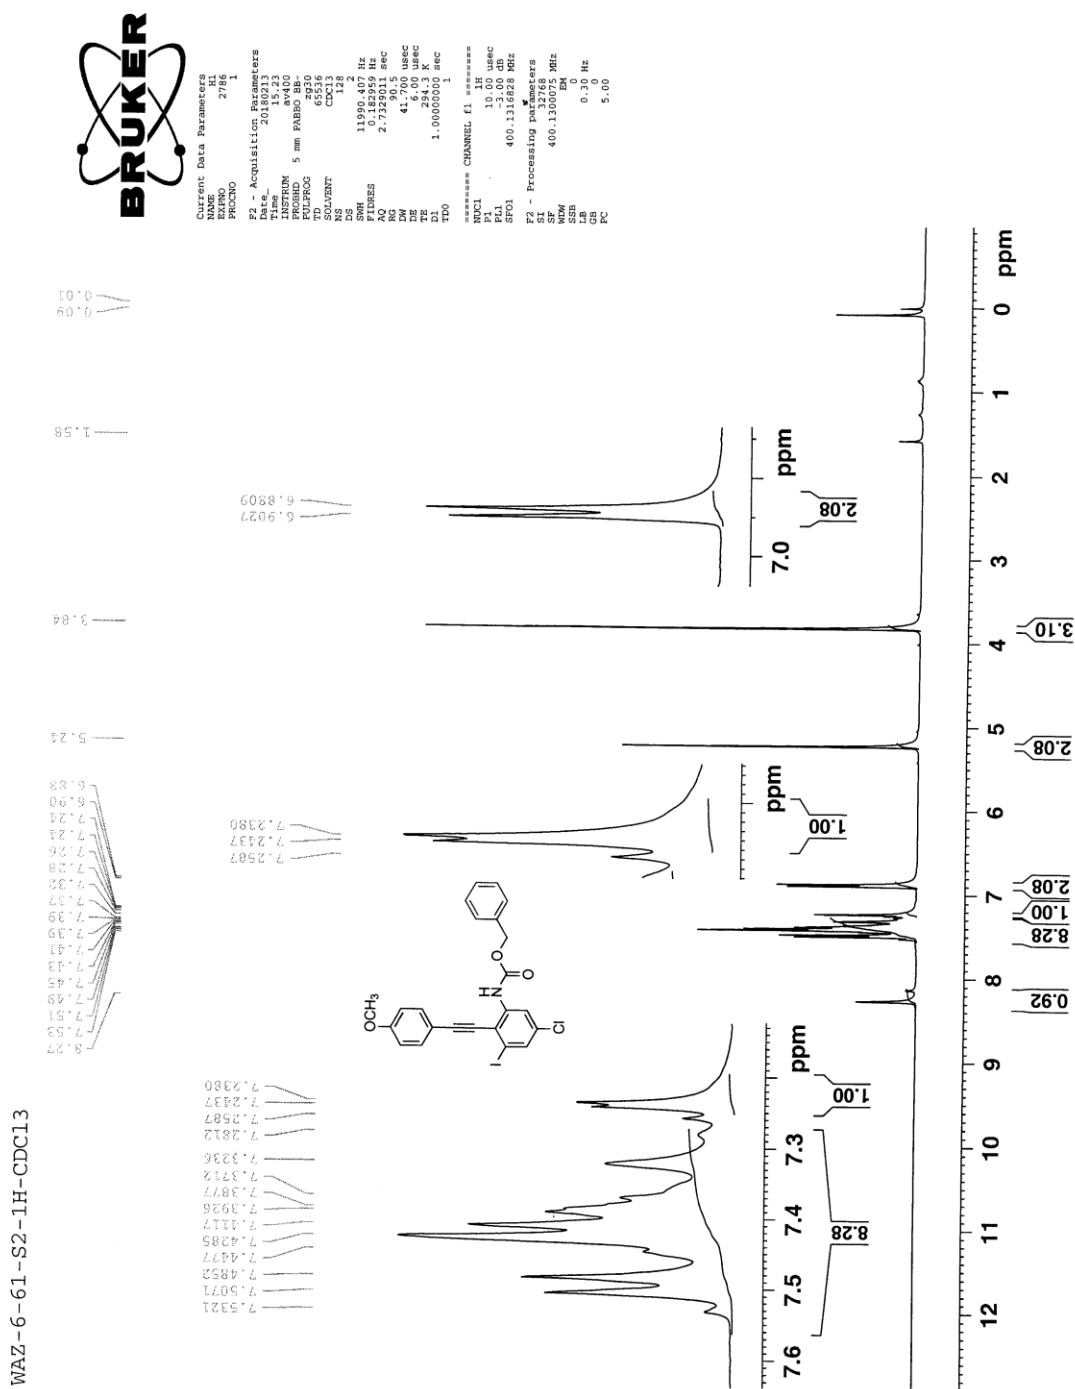

### 1.5.44 <sup>13</sup>C-NMR of benzyl (5-chloro-3-iodo-2-((4-methoxyphenyl)ethynyl)phenyl)-carbamate (34) in CDCl<sub>3</sub> at 25 °C.

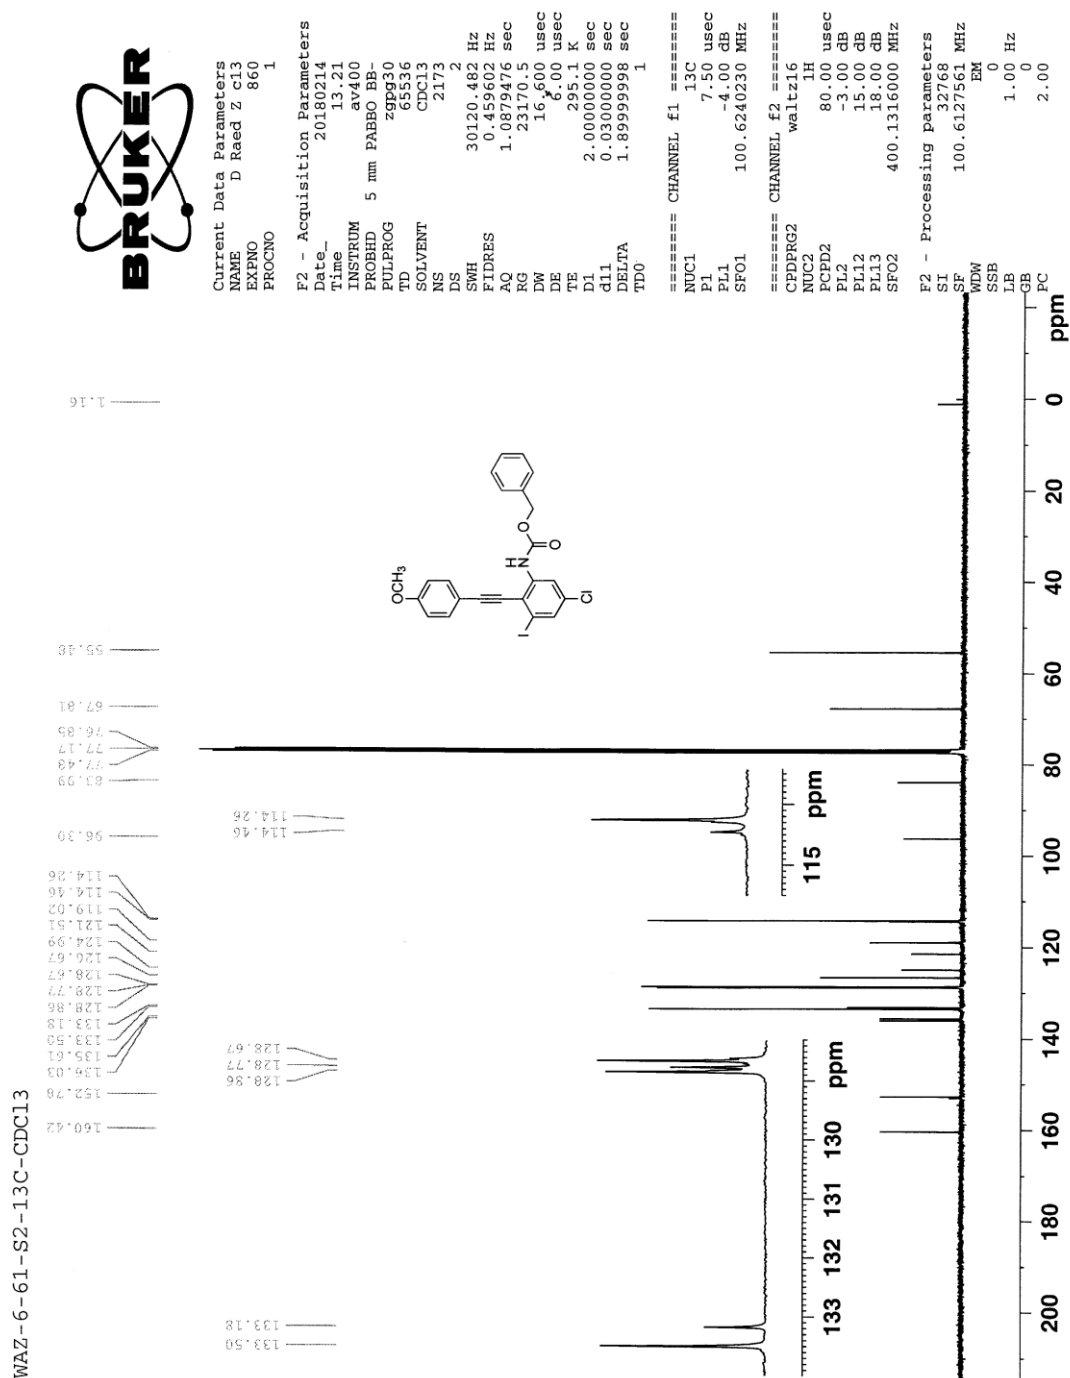

1.5.45  $^1\text{H-NMR}$  of benzyl (5-chloro-2,3-bis((4-methoxyphenyl)ethynyl)phenyl)-carbamate (bis-coupling pdt) in  $\text{CDCl}_3$  at  $25^\circ\text{C}$ .

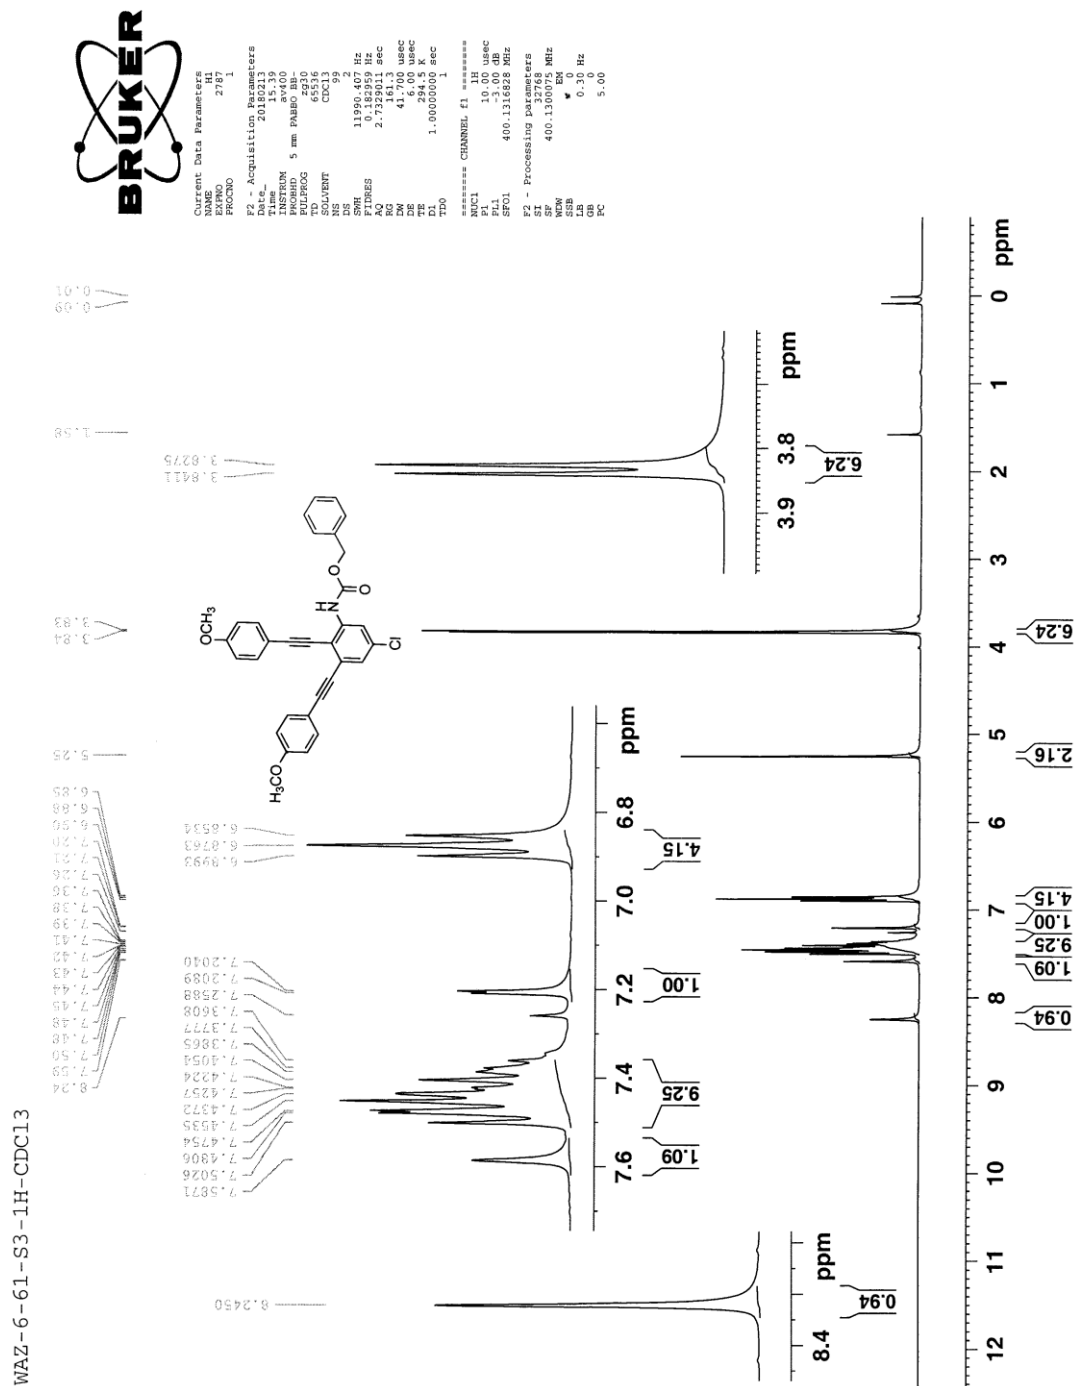



### 1.5.46 <sup>13</sup>C-NMR of benzyl (5-chloro-2,3-bis((4-methoxyphenyl)ethynyl)phenyl)-carbamate (bis-coupling pdt) in CDCl<sub>3</sub> at 25 °C.

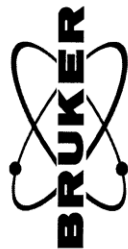

```

Current Data Parameters
NAME      D Raed Z c13
EXPNO    859
PROCNO   1

F2 - Acquisition Parameters
Date_    20180213
Time     15.49
INSTRUM  av400
PROBHD   5 mm PABBO BB-
PULPROG  zgpg30
TD       65536
SOLVENT  CDCl3
NS       23405
DS       2
SWH      30120.482 Hz
FIDRES   0.459602 Hz
AQ       1.0879476 sec
RG       23170.5
DW       16.600 usec
DE       6.00 usec
TE       295.1 K
D1       2.00000000 sec
d11      0.03000000 sec
DELTA    1.89999998 sec
TD0      1

===== CHANNEL f1 =====
NUC1     13C
P1       7.50 usec
PL1      -4.00 dB
SFO1     100.6240230 MHz

===== CHANNEL f2 =====
CPDPRG2  waltz16
NUC2     1H
PCPD2    80.00 usec
PL2      -3.00 dB
PL12     15.00 dB
PL13     18.00 dB
SFO2     400.1316000 MHz

F2 - Processing parameters
SI       32768
SF       100.6127563 MHz
EM       0
WDW      0
SSB      0
LB       1.00 Hz
GB       0
PC       2.00
    
```

WAZ-6-61-S3-13C-CDCl3

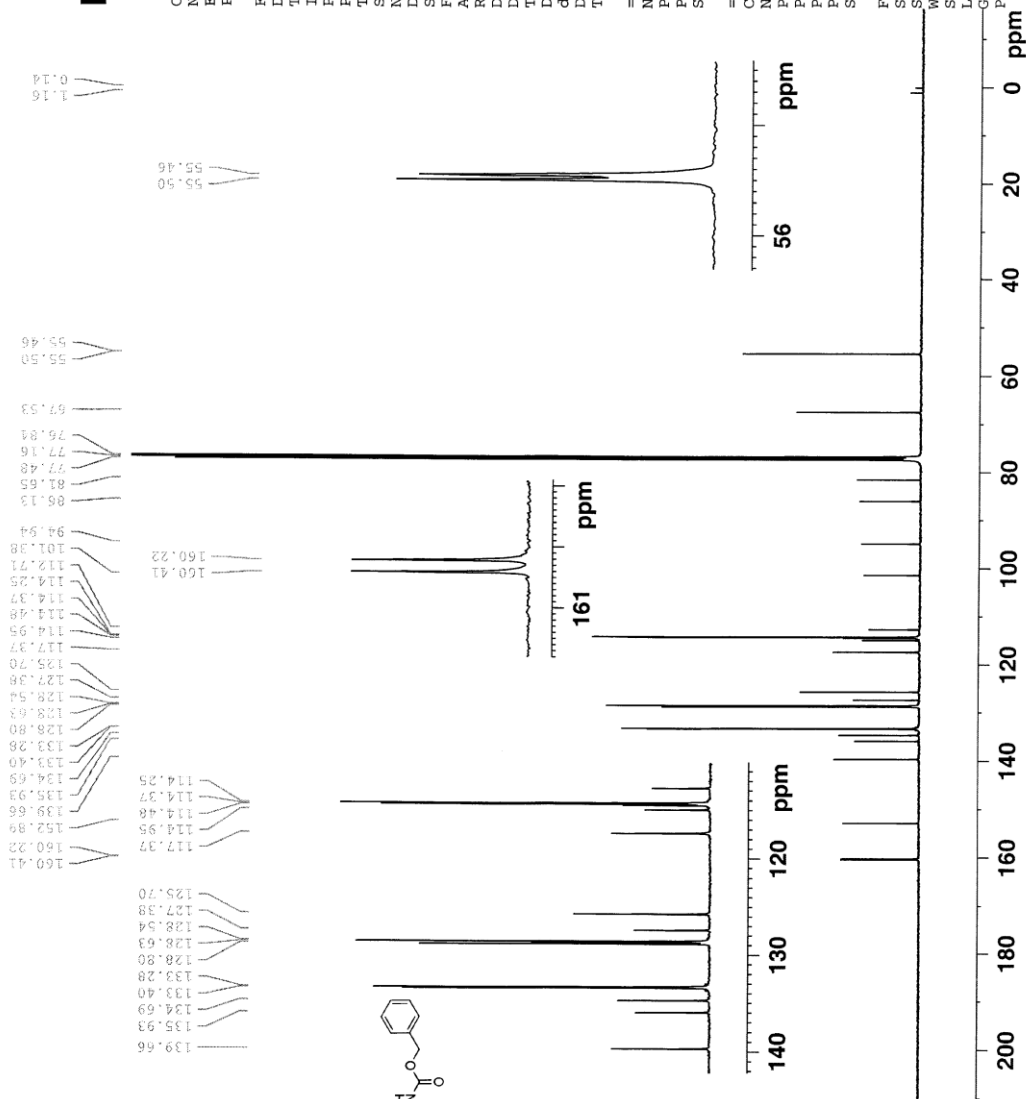

**1.5.47  $^1\text{H-NMR}$  of benzyl (4-chloro-6-iodo-4'-methoxy-[1,1'-biphenyl]-2-yl)carbamate (35) in  $\text{CDCl}_3$  at 25  $^\circ\text{C}$ .**

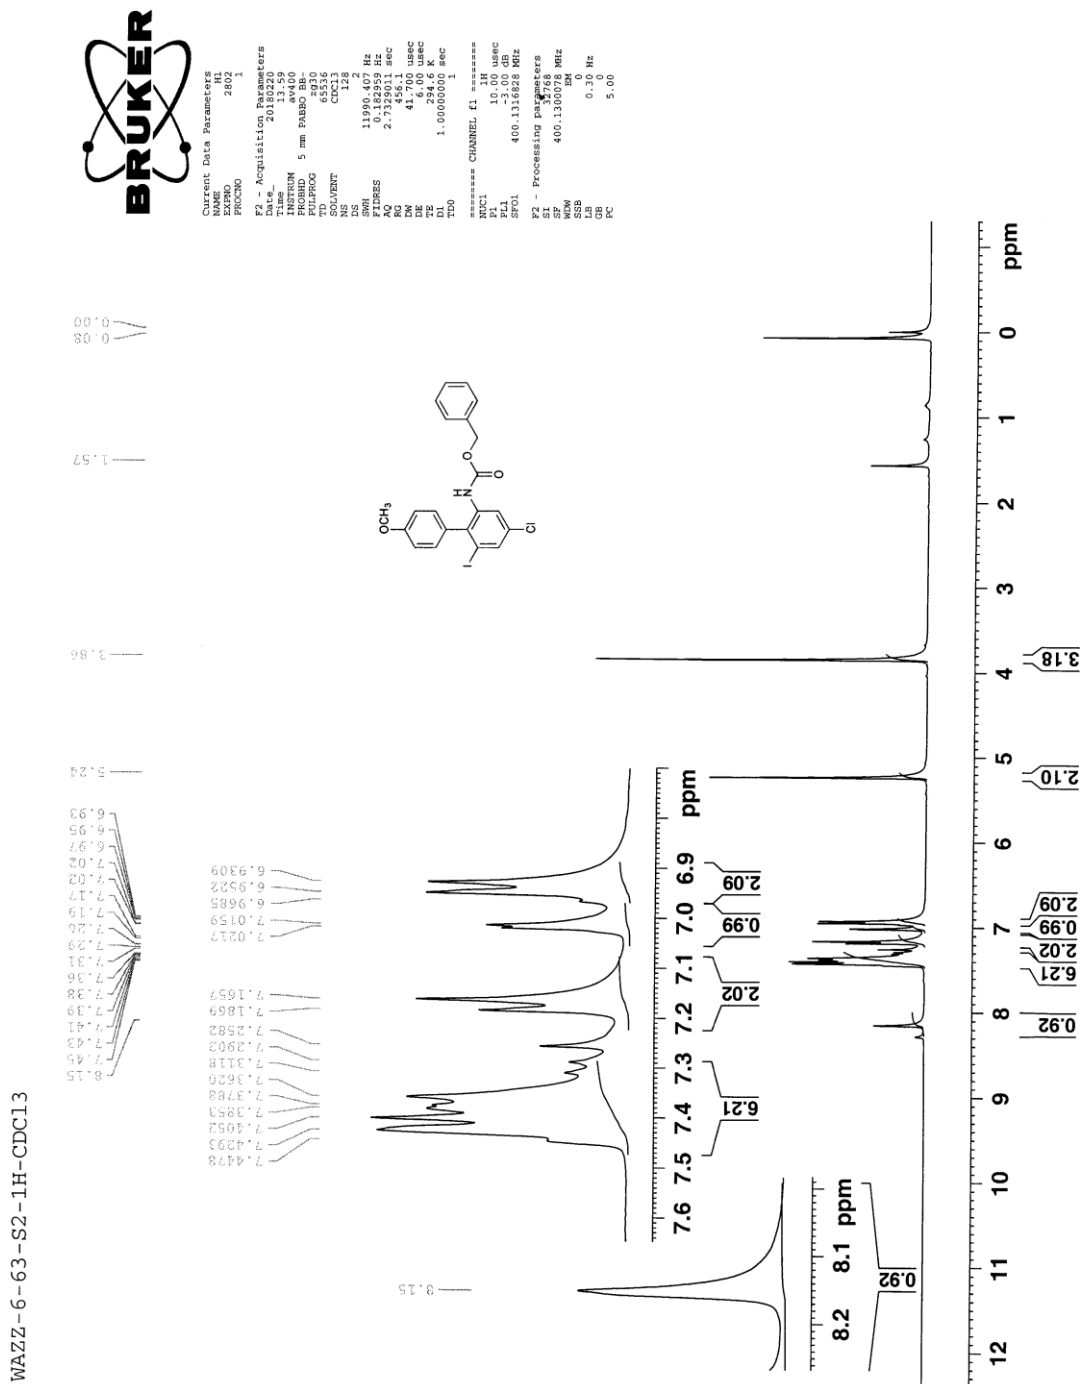

**1.5.48  $^{13}\text{C}$ -NMR of benzyl (4-chloro-6-iodo-4'-methoxy-[1,1'-biphenyl]-2-yl)carbamate (35) in  $\text{CDCl}_3$  at 25  $^\circ\text{C}$ .**

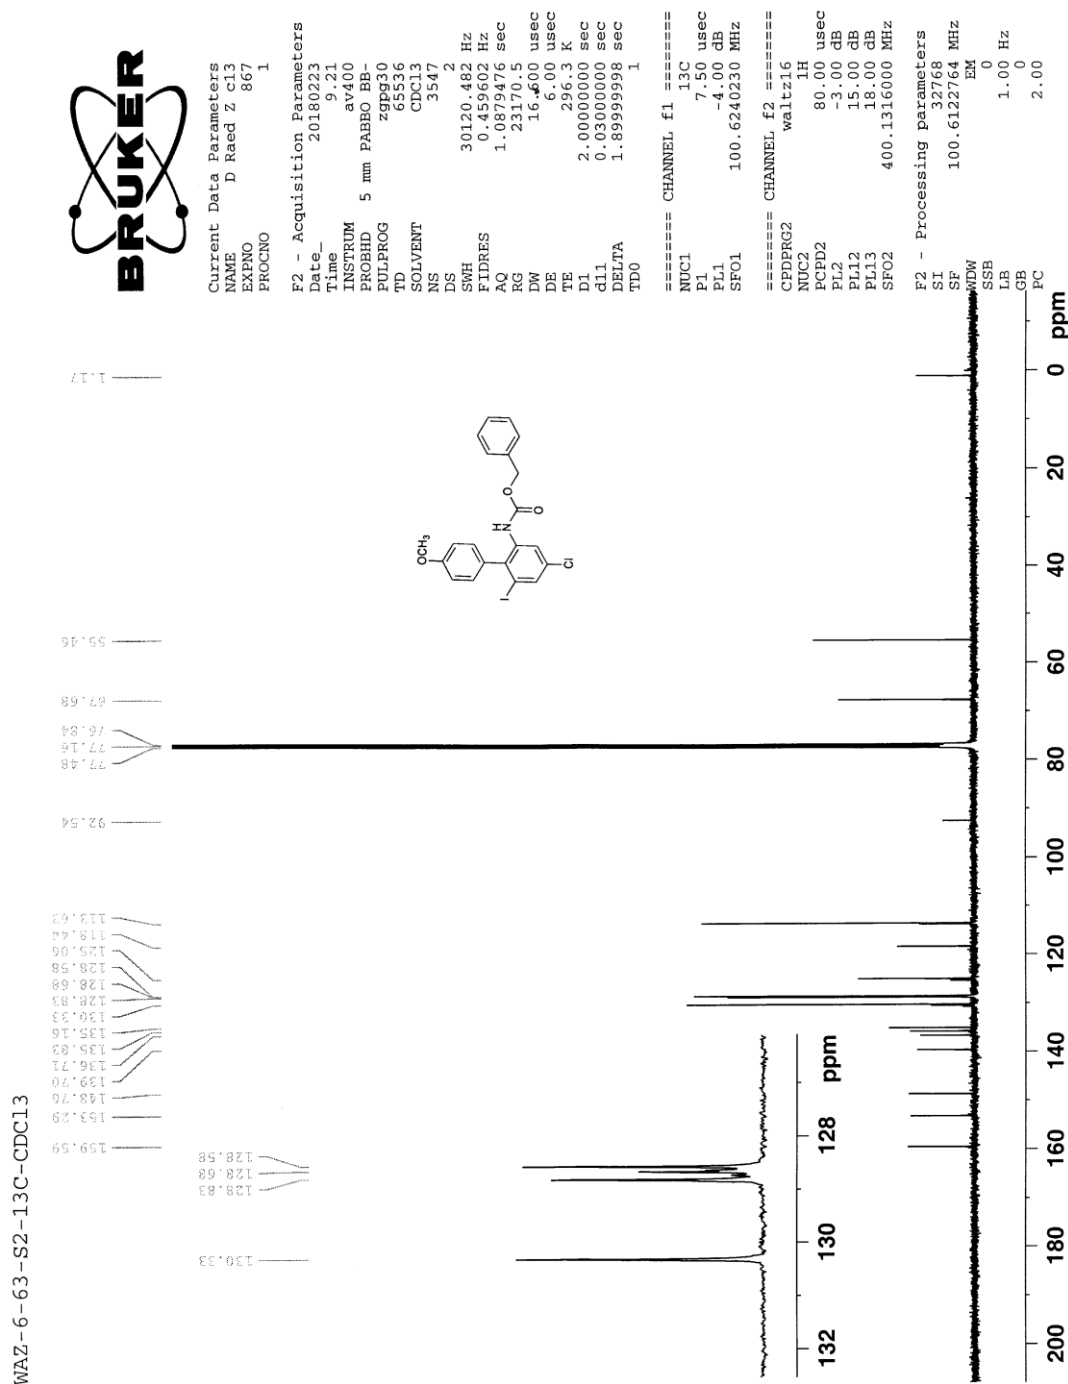

1.5.49 <sup>1</sup>H-NMR of benzyl (5'-chloro-4,4''-dimethoxy-[1,1':2',1''-terphenyl]-3'-yl)carbamate (bis-coupling pdt) in CDCl<sub>3</sub> at 25 °C.

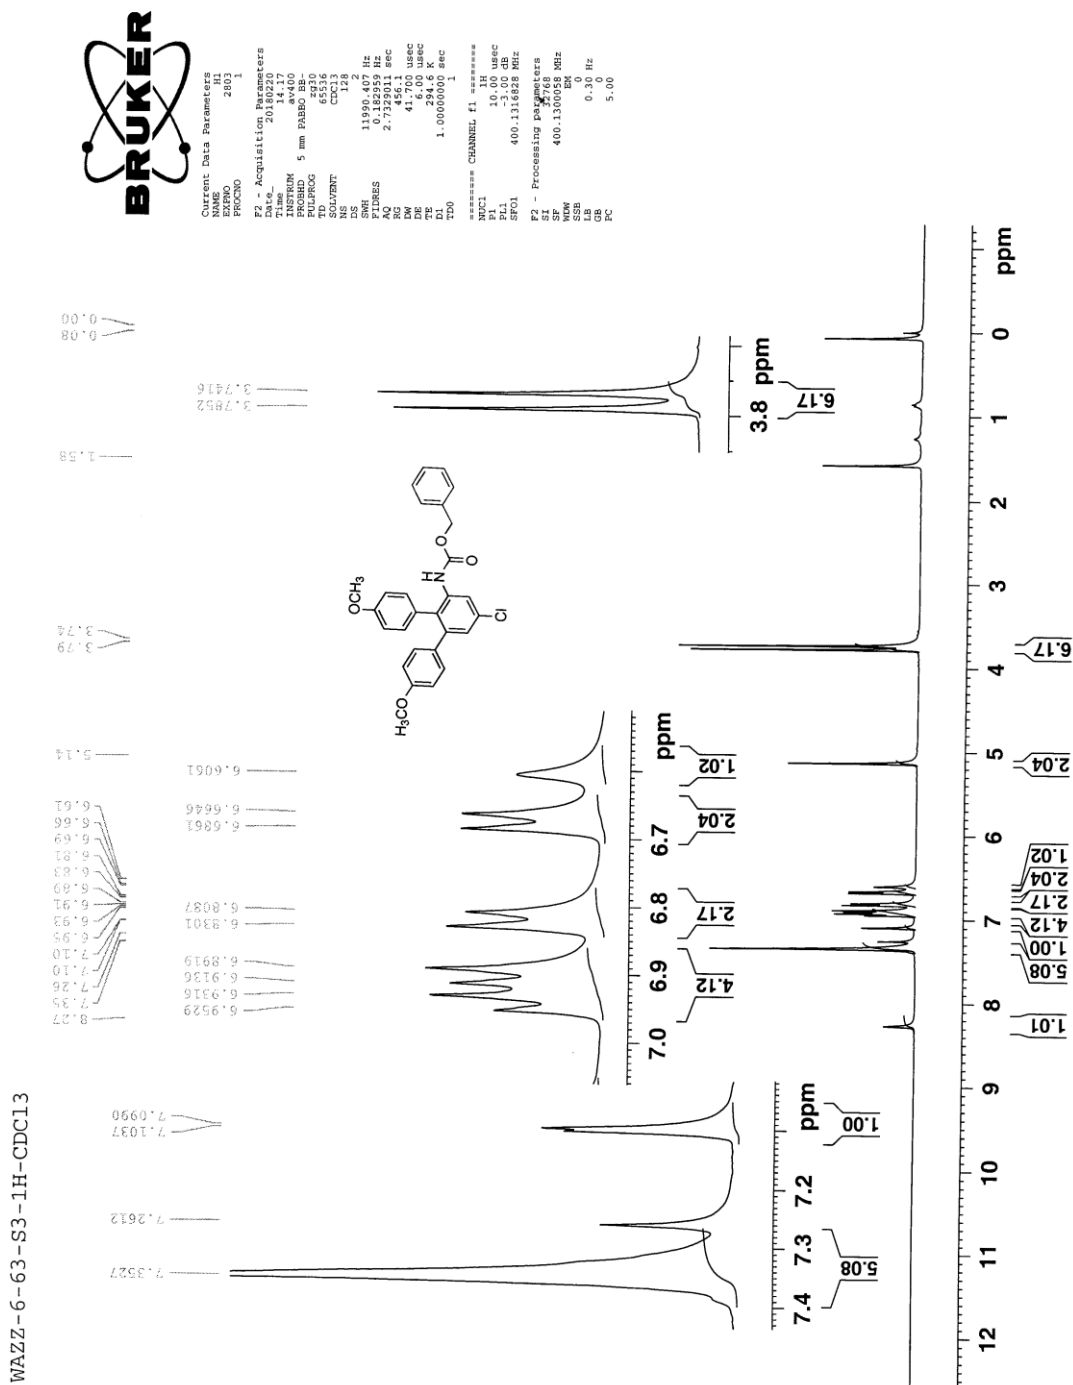

**1.5.50  $^{13}\text{C}$ -NMR of benzyl (5'-chloro-4,4''-dimethoxy-[1,1':2',1''-terphenyl]-3'-yl)carbamate (bis-coupling pdt) in  $\text{CDCl}_3$  at 25 °C.**

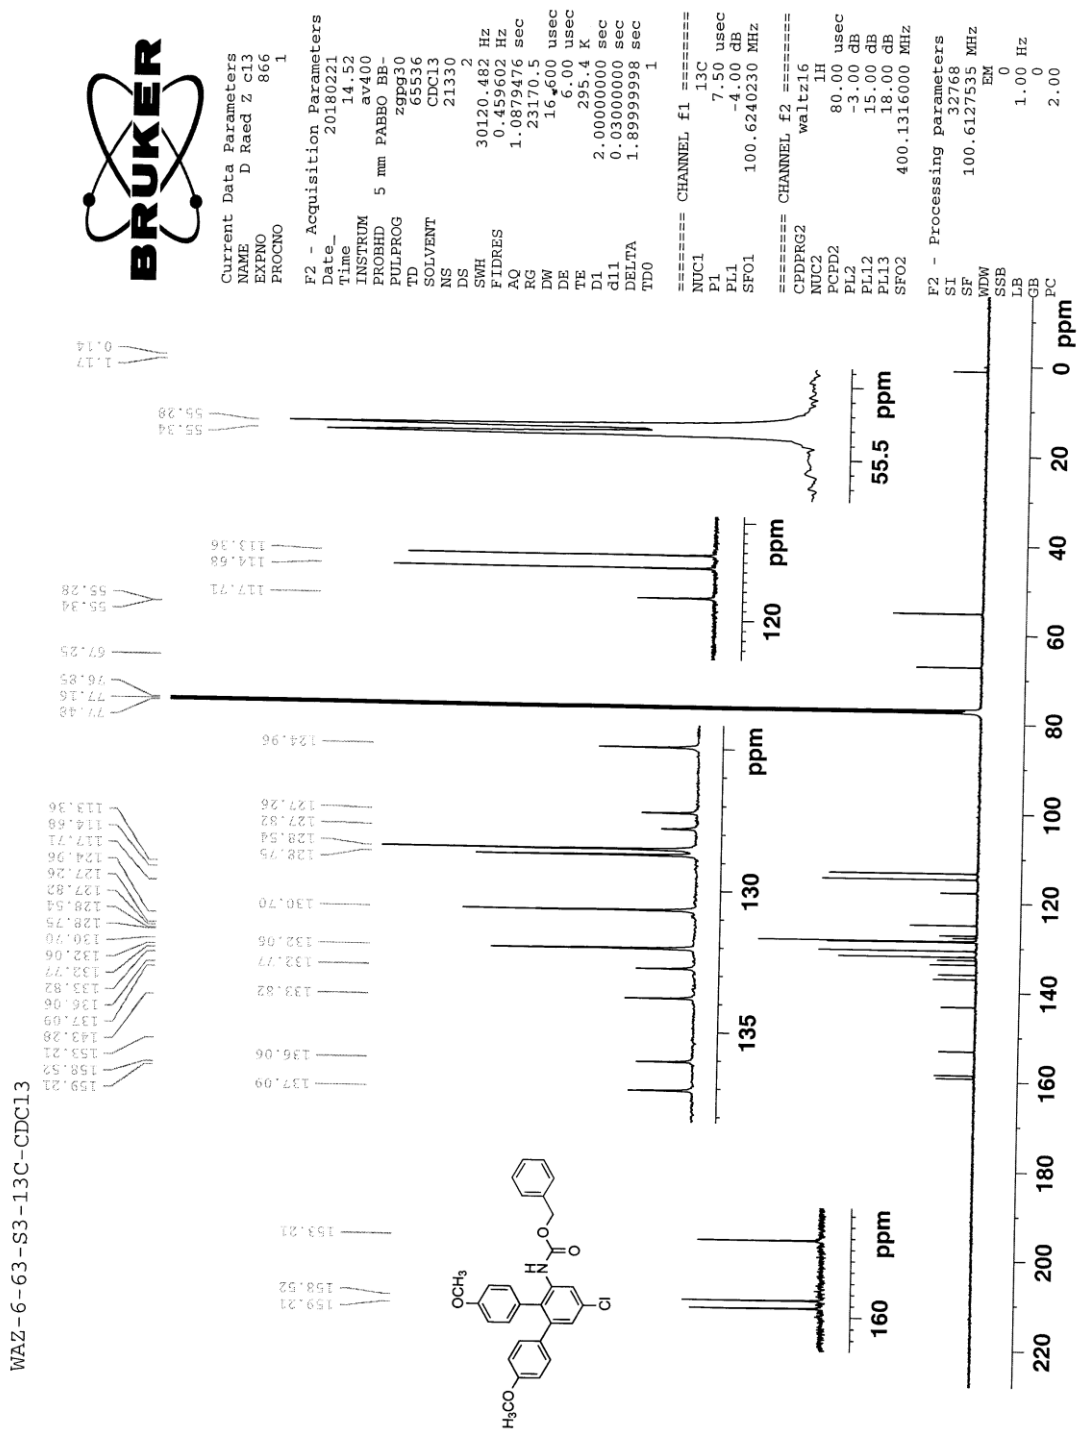

1.6.2 X-ray data of ethyl (2,3-diiodophenyl)carbamate (**6A**)

### STRUCTURE REPORT

**XCL Code:** JUS1711

**Date:** 20 October 2017

**Compound:** Ethyl (2,3-diiodophenyl)carbamate

**Formula:** C<sub>9</sub>H<sub>9</sub>I<sub>2</sub>NO<sub>2</sub>

**Supervisor:** R. M. Al-Zoubi, Jordan University of Science and Technology

**Crystallographer:** R. McDonald

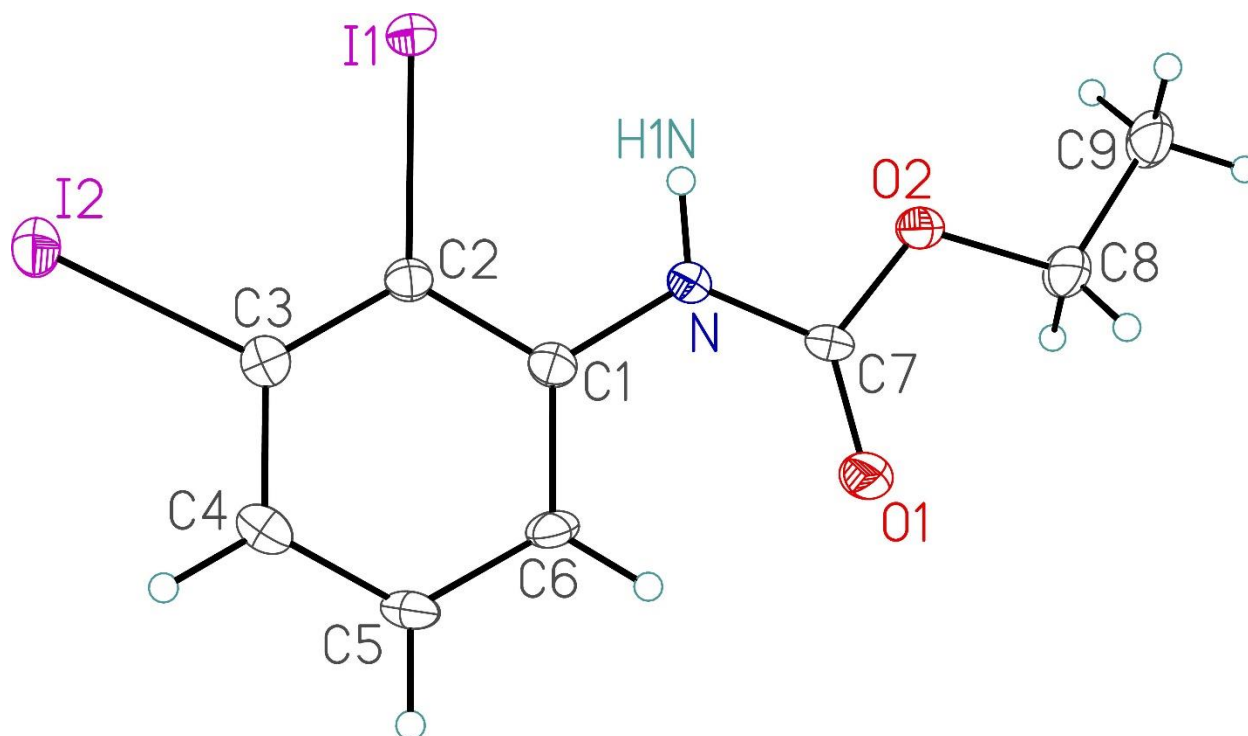

### Figure Legends

- Figure 1.** Perspective view of the ethyl (2,3-diiodophenyl)carbamate molecule showing the atom labelling scheme. Non-hydrogen atoms are represented by Gaussian ellipsoids at the 30% probability level. Hydrogen atoms are shown with arbitrarily small thermal parameters.
- Figure 2.** Alternate view of the molecule.

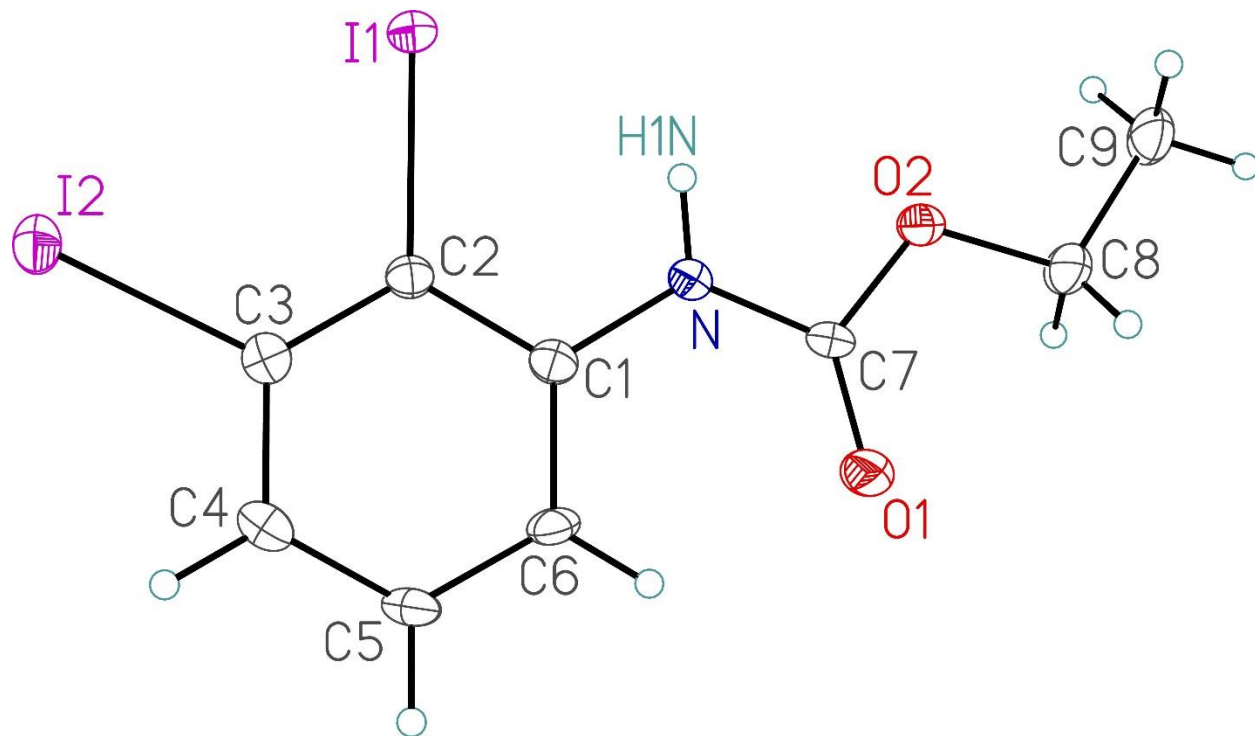



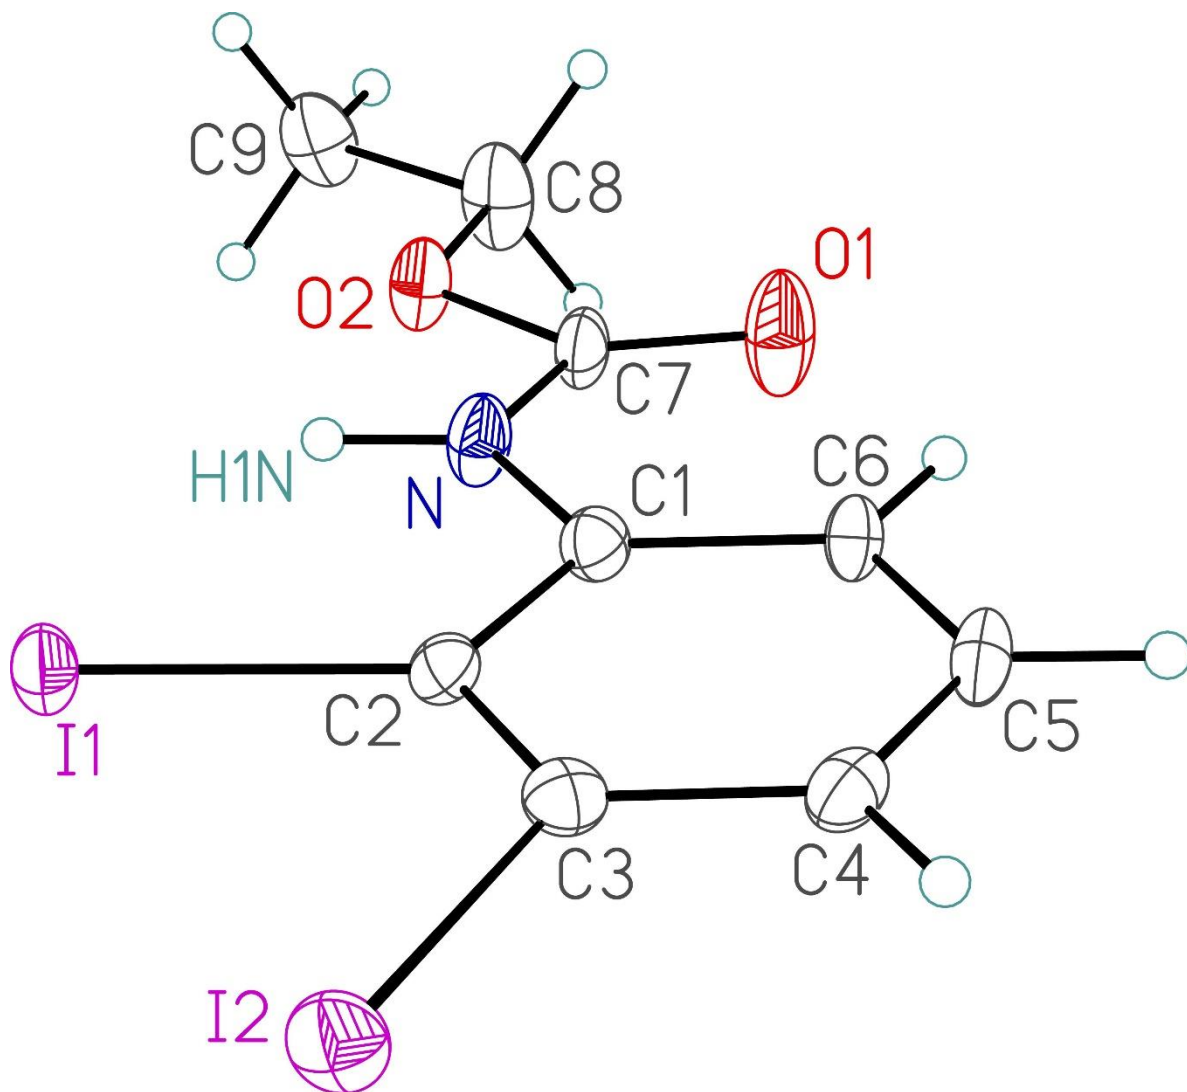

## List of Tables

- Table 1.** Crystallographic Experimental Details
- Table 2.** Atomic Coordinates and Equivalent Isotropic Displacement Parameters
- Table 3.** Selected Interatomic Distances
- Table 4.** Selected Interatomic Angles
- Table 5.** Torsional Angles
- Table 6.** Anisotropic Displacement Parameters
- Table 7.** Derived Atomic Coordinates and Displacement Parameters for Hydrogen Atoms

**Table 1.** Crystallographic Experimental Details*A. Crystal Data*

|                                          |                                                              |
|------------------------------------------|--------------------------------------------------------------|
| formula                                  | C <sub>9</sub> H <sub>9</sub> I <sub>2</sub> NO <sub>2</sub> |
| formula weight                           | 416.97                                                       |
| crystal dimensions (mm)                  | 0.40 × 0.18 × 0.13                                           |
| crystal system                           | monoclinic                                                   |
| space group                              | <i>P</i> 2 <sub>1</sub> / <i>c</i> (No. 14)                  |
| unit cell parameters <sup>a</sup>        |                                                              |
| <i>a</i> (Å)                             | 12.230 (3)                                                   |
| <i>b</i> (Å)                             | 13.783 (4)                                                   |
| <i>c</i> (Å)                             | 7.0214 (18)                                                  |
| β (deg)                                  | 99.948 (3)                                                   |
| <i>V</i> (Å <sup>3</sup> )               | 1165.8 (5)                                                   |
| <i>Z</i>                                 | 4                                                            |
| ρ <sub>calcd</sub> (g cm <sup>-3</sup> ) | 2.376                                                        |
| μ (mm <sup>-1</sup> )                    | 5.371                                                        |

*B. Data Collection and Refinement Conditions*

|                                                                                                        |                                                                                         |
|--------------------------------------------------------------------------------------------------------|-----------------------------------------------------------------------------------------|
| diffractometer                                                                                         | Bruker PLATFORM/APEX II CCD <sup>b</sup>                                                |
| radiation (λ [Å])                                                                                      | graphite-monochromated Mo Kα (0.71073)                                                  |
| temperature (°C)                                                                                       | -80                                                                                     |
| scan type                                                                                              | ω scans (0.3°) (15 s exposures)                                                         |
| data collection 2θ limit (deg)                                                                         | 56.54                                                                                   |
| total data collected                                                                                   | 9415 (-16 ≤ <i>h</i> ≤ 16, -18 ≤ <i>k</i> ≤ 18, -9 ≤ <i>l</i> ≤ 9)                      |
| independent reflections                                                                                | 2585 ( <i>R</i> <sub>int</sub> = 0.0452)                                                |
| number of observed reflections ( <i>NO</i> )                                                           | 2403 [ <i>F</i> <sub>o</sub> <sup>2</sup> ≥ 2σ( <i>F</i> <sub>o</sub> <sup>2</sup> )]   |
| structure solution method                                                                              | Patterson/structure expansion ( <i>DIRDIF</i> -2008 <sup>c</sup> )                      |
| refinement method                                                                                      | full-matrix least-squares on <i>F</i> <sup>2</sup> ( <i>SHELXL</i> -2014 <sup>d</sup> ) |
| absorption correction method                                                                           | multi-scan ( <i>TWINABS</i> )                                                           |
| range of transmission factors                                                                          | 0.3742–0.2287                                                                           |
| data/restraints/parameters                                                                             | 2585 / 0 / 128                                                                          |
| goodness-of-fit ( <i>S</i> ) <sup>e</sup> [all data]                                                   | 1.120                                                                                   |
| final <i>R</i> indices <sup>f</sup>                                                                    |                                                                                         |
| <i>R</i> <sub>1</sub> [ <i>F</i> <sub>o</sub> <sup>2</sup> ≥ 2σ( <i>F</i> <sub>o</sub> <sup>2</sup> )] | 0.0385                                                                                  |
| <i>wR</i> <sub>2</sub> [all data]                                                                      | 0.1126                                                                                  |
| largest difference peak and hole                                                                       | 1.058 and -1.218 e Å <sup>-3</sup>                                                      |

<sup>a</sup>Obtained from least-squares refinement of 4513 reflections with 4.50° < 2θ < 56.44°.

(continued)

**Table 1.** Crystallographic Experimental Details (continued)

<sup>b</sup>Programs for diffractometer operation, data collection, data reduction and absorption correction were those supplied by Bruker. The crystal used for data collection was found to display non-merohedral twinning. Both components of the twin were indexed with the program *CELL\_NOW* (Bruker AXS Inc., Madison, WI, 2004). The second twin component can be related to the first component by 180° rotation about the [1 0 0] axis in both real and reciprocal space. Integrated intensities for the reflections from the two components were written into a *SHELXL-2014* HKLF 5 reflection file with the data integration program *SAINT* (version 8.38A), using all reflection data (exactly overlapped, partially overlapped and non-overlapped). The refined value of the twin fraction (*SHELXL-2014* BASF parameter) was 0.1855(14).

<sup>c</sup>Beurskens, P. T.; Beurskens, G.; de Gelder, R.; Smits, J. M. M.; Garcia-Granda, S.; Gould, R. O. (2008). The *DIRDIF-2008* program system. Crystallography Laboratory, Radboud University Nijmegen, The Netherlands.

<sup>d</sup>Sheldrick, G. M. *Acta Crystallogr.* **2015**, *C71*, 3–8.

<sup>e</sup> $S = [\sum w(F_o^2 - F_c^2)^2 / (n - p)]^{1/2}$  ( $n$  = number of data;  $p$  = number of parameters varied;  $w = [\sigma^2(F_o^2) + (0.0631P)^2 + 3.7884P]^{-1}$  where  $P = [\text{Max}(F_o^2, 0) + 2F_c^2]/3$ ).

<sup>f</sup> $R_1 = \sum ||F_o| - |F_c|| / \sum |F_o|$ ;  $wR_2 = [\sum w(F_o^2 - F_c^2)^2 / \sum w(F_o^4)]^{1/2}$ .

**Table 2.** Atomic Coordinates and Equivalent Isotropic Displacement Parameters

| Atom | <i>x</i>   | <i>y</i>   | <i>z</i>   | $U_{\text{eq}}, \text{\AA}^2$ |
|------|------------|------------|------------|-------------------------------|
| I1   | 0.33053(4) | 0.00919(3) | 0.13582(7) | 0.03223(14)*                  |
| I2   | 0.06847(4) | 0.13694(4) | 0.01482(8) | 0.03922(16)*                  |
| O1   | 0.6467(5)  | 0.2903(4)  | 0.3380(12) | 0.0575(19)*                   |
| O2   | 0.6969(4)  | 0.1331(3)  | 0.3480(9)  | 0.0369(12)*                   |
| N    | 0.5216(5)  | 0.1666(4)  | 0.2407(10) | 0.0344(13)*                   |
| C1   | 0.4204(5)  | 0.2164(5)  | 0.1846(9)  | 0.0272(13)*                   |
| C2   | 0.3217(5)  | 0.1617(4)  | 0.1341(9)  | 0.0249(11)*                   |
| C3   | 0.2209(5)  | 0.2097(5)  | 0.0822(9)  | 0.0276(13)*                   |
| C4   | 0.2164(6)  | 0.3110(5)  | 0.0764(10) | 0.0304(13)*                   |
| C5   | 0.3135(6)  | 0.3630(4)  | 0.1274(10) | 0.0302(14)*                   |
| C6   | 0.4148(6)  | 0.3177(4)  | 0.1792(10) | 0.0294(14)*                   |
| C7   | 0.6237(6)  | 0.2059(5)  | 0.3105(11) | 0.0316(15)*                   |
| C8   | 0.8099(6)  | 0.1622(6)  | 0.4241(17) | 0.050(2)*                     |
| C9   | 0.8813(6)  | 0.0755(6)  | 0.4564(16) | 0.048(2)*                     |

Anisotropically-refined atoms are marked with an asterisk (\*). The form of the anisotropic displacement parameter is:  $\exp[-2\pi^2(h^2a^{*2}U_{11} + k^2b^{*2}U_{22} + l^2c^{*2}U_{33} + 2klb^*c^*U_{23} + 2hla^*c^*U_{13} + 2hka^*b^*U_{12})]$ .

**Table 3.** Selected Interatomic Distances (Å)

| Atom1 | Atom2 | Distance | Atom1 | Atom2 | Distance  |
|-------|-------|----------|-------|-------|-----------|
| I1    | C2    | 2.105(6) | C1    | C2    | 1.415(9)  |
| I2    | C3    | 2.098(7) | C1    | C6    | 1.398(9)  |
| O1    | C7    | 1.205(9) | C2    | C3    | 1.391(9)  |
| O2    | C7    | 1.340(8) | C3    | C4    | 1.398(9)  |
| O2    | C8    | 1.450(9) | C4    | C5    | 1.381(10) |
| N     | C1    | 1.412(9) | C5    | C6    | 1.379(10) |
| N     | C7    | 1.371(9) | C8    | C9    | 1.475(11) |

**Table 4.** Selected Interatomic Angles (deg)

| Atom1 | Atom2 | Atom3 | Angle    | Atom1 | Atom2 | Atom3 | Angle    |
|-------|-------|-------|----------|-------|-------|-------|----------|
| C7    | O2    | C8    | 115.3(5) | I2    | C3    | C4    | 116.2(5) |
| C1    | N     | C7    | 127.5(6) | C2    | C3    | C4    | 120.8(6) |
| N     | C1    | C2    | 118.6(6) | C3    | C4    | C5    | 118.9(6) |
| N     | C1    | C6    | 122.0(6) | C4    | C5    | C6    | 121.8(6) |
| C2    | C1    | C6    | 119.4(6) | C1    | C6    | C5    | 119.8(6) |
| I1    | C2    | C1    | 119.4(5) | O1    | C7    | O2    | 124.2(7) |
| I1    | C2    | C3    | 121.2(5) | O1    | C7    | N     | 127.7(6) |
| C1    | C2    | C3    | 119.4(6) | O2    | C7    | N     | 108.1(5) |
| I2    | C3    | C2    | 123.0(5) | O2    | C8    | C9    | 109.5(6) |

**Table 5.** Torsional Angles (deg)

| Atom1 | Atom2 | Atom3 | Atom4 | Angle     | Atom1 | Atom2 | Atom3 | Atom4 | Angle     |
|-------|-------|-------|-------|-----------|-------|-------|-------|-------|-----------|
| C8    | O2    | C7    | O1    | -0.8(12)  | N     | C1    | C6    | C5    | -178.6(7) |
| C8    | O2    | C7    | N     | -179.8(8) | C2    | C1    | C6    | C5    | 0.8(10)   |
| C7    | O2    | C8    | C9    | -179.4(8) | I1    | C2    | C3    | I2    | 3.2(7)    |
| C7    | N     | C1    | C2    | -173.8(7) | I1    | C2    | C3    | C4    | -178.2(5) |
| C7    | N     | C1    | C6    | 5.6(12)   | C1    | C2    | C3    | I2    | -177.6(5) |
| C1    | N     | C7    | O1    | 0.3(14)   | C1    | C2    | C3    | C4    | 1.0(10)   |
| C1    | N     | C7    | O2    | 179.3(7)  | I2    | C3    | C4    | C5    | 177.3(5)  |
| N     | C1    | C2    | I1    | -2.0(8)   | C2    | C3    | C4    | C5    | -1.4(10)  |
| N     | C1    | C2    | C3    | 178.7(6)  | C3    | C4    | C5    | C6    | 1.6(11)   |
| C6    | C1    | C2    | I1    | 178.6(5)  | C4    | C5    | C6    | C1    | -1.3(11)  |
| C6    | C1    | C2    | C3    | -0.7(9)   |       |       |       |       |           |

**Table 6.** Anisotropic Displacement Parameters ( $U_{ij}$ , Å<sup>2</sup>)

| Atom | $U_{11}$  | $U_{22}$  | $U_{33}$  | $U_{23}$     | $U_{13}$  | $U_{12}$     |
|------|-----------|-----------|-----------|--------------|-----------|--------------|
| I1   | 0.0314(2) | 0.0209(2) | 0.0438(3) | -0.00102(16) | 0.0048(2) | -0.00065(15) |
| I2   | 0.0273(2) | 0.0406(3) | 0.0487(3) | 0.0020(2)    | 0.0039(2) | -0.00115(17) |
| O1   | 0.032(3)  | 0.029(3)  | 0.104(6)  | -0.002(3)    | -0.008(3) | 0.005(2)     |
| O2   | 0.029(2)  | 0.024(2)  | 0.055(3)  | -0.006(2)    | -0.002(2) | 0.0011(17)   |
| N    | 0.024(3)  | 0.023(3)  | 0.055(4)  | -0.005(3)    | 0.001(3)  | 0.003(2)     |
| C1   | 0.029(3)  | 0.025(3)  | 0.027(3)  | 0.002(2)     | 0.004(2)  | 0.002(2)     |
| C2   | 0.029(3)  | 0.024(3)  | 0.022(3)  | -0.004(2)    | 0.005(2)  | 0.000(2)     |
| C3   | 0.030(3)  | 0.031(3)  | 0.022(3)  | 0.002(2)     | 0.004(2)  | 0.001(2)     |
| C4   | 0.037(3)  | 0.030(3)  | 0.025(3)  | 0.001(3)     | 0.006(3)  | 0.010(3)     |
| C5   | 0.043(4)  | 0.018(3)  | 0.027(3)  | -0.001(2)    | -0.001(3) | 0.005(2)     |
| C6   | 0.036(3)  | 0.017(3)  | 0.034(3)  | -0.007(2)    | 0.004(3)  | -0.004(2)    |
| C7   | 0.032(3)  | 0.017(3)  | 0.046(4)  | -0.001(3)    | 0.007(3)  | 0.004(2)     |
| C8   | 0.025(3)  | 0.036(4)  | 0.084(7)  | -0.004(5)    | -0.007(4) | -0.004(3)    |
| C9   | 0.027(3)  | 0.042(4)  | 0.070(6)  | 0.008(4)     | -0.001(4) | -0.003(3)    |

The form of the anisotropic displacement parameter is:

$$\exp[-2\pi^2(h^2a^*{}^2U_{11} + k^2b^*{}^2U_{22} + l^2c^*{}^2U_{33} + 2klb^*c^*U_{23} + 2hla^*c^*U_{13} + 2hka^*b^*U_{12})]$$

**Table7.** Derived Atomic Coordinates and Displacement Parameters for Hydrogen Atoms

| Atom | $x$      | $y$      | $z$      | $U_{eq}$ , Å <sup>2</sup> |
|------|----------|----------|----------|---------------------------|
| H1N  | 0.518943 | 0.103033 | 0.229669 | 0.041                     |
| H4   | 0.147611 | 0.343564 | 0.038111 | 0.036                     |
| H5   | 0.310489 | 0.431916 | 0.126790 | 0.036                     |
| H6   | 0.480596 | 0.355214 | 0.211150 | 0.035                     |
| H8A  | 0.812049 | 0.197518 | 0.547454 | 0.060                     |
| H8B  | 0.837428 | 0.206220 | 0.331462 | 0.060                     |
| H9A  | 0.957723 | 0.095215 | 0.507901 | 0.057                     |
| H9B  | 0.854241 | 0.032449 | 0.549213 | 0.057                     |
| H9C  | 0.879559 | 0.041130 | 0.333736 | 0.057                     |

1.6.2 X-ray data of ethyl (2,3-diiodo-5-methoxyphenyl)carbamate (**23A**)

### STRUCTURE REPORT

**XCL Code:** JUS1710

**Date:** 20 October 2017

**Compound:** Ethyl (2,3-diiodo-5-methoxyphenyl)carbamate

**Formula:** C<sub>10</sub>H<sub>11</sub>I<sub>2</sub>NO<sub>3</sub>

**Supervisor:** R. M. Al-Zoubi, Jordan University of Science and Technology

**Crystallographer:** R. McDonald

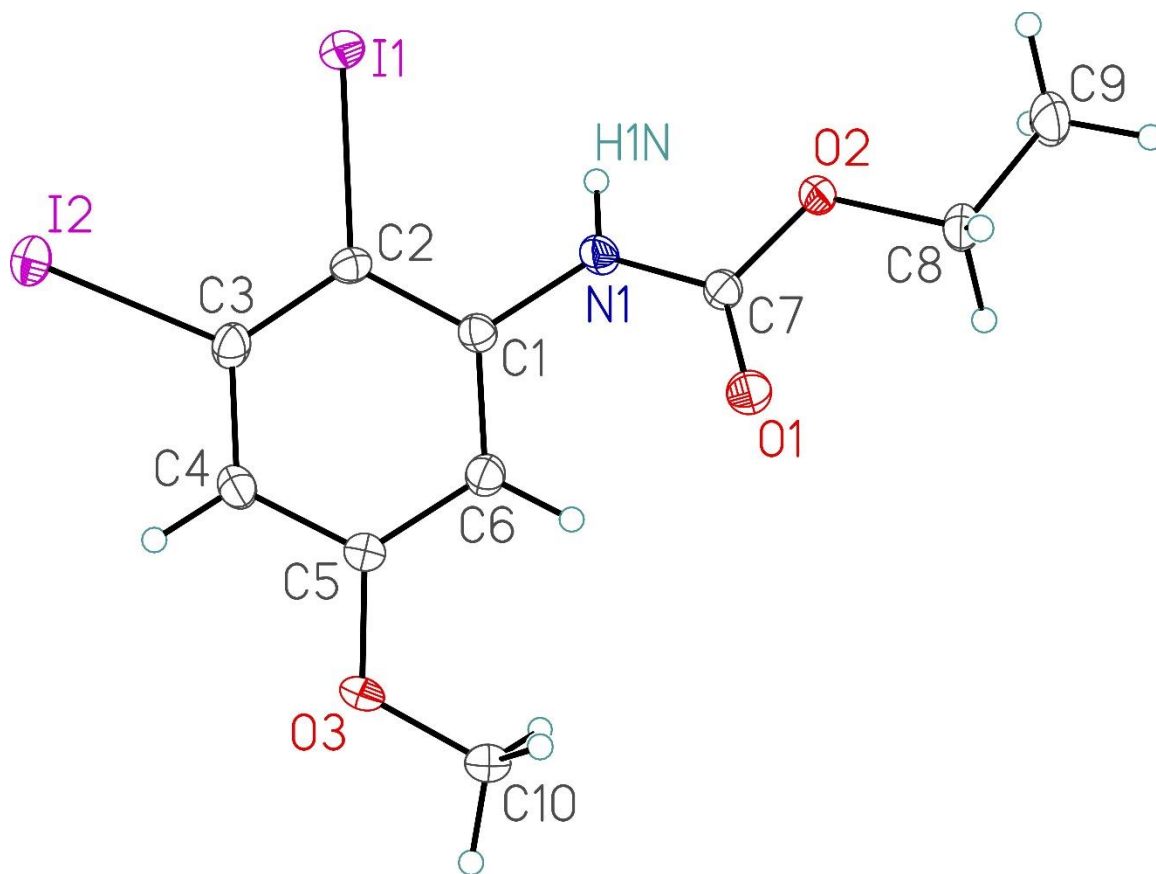



### Figure Legends

- Figure 1.** Perspective view of one of the two crystallographically-independent molecules of ethyl (2,3-diiodo-5-methoxyphenyl)carbamate (molecule A) showing the atom labelling scheme. Non-hydrogen atoms are represented by Gaussian ellipsoids at the 30% probability level. Hydrogen atoms are shown with arbitrarily small thermal parameters.
- Figure 2.** Alternate view of molecule A.
- Figure 3.** View of the second crystallographically-independent molecule of ethyl (2,3-diiodo-5-methoxyphenyl)carbamate (molecule B).
- Figure 4.** Alternate view of molecule B.

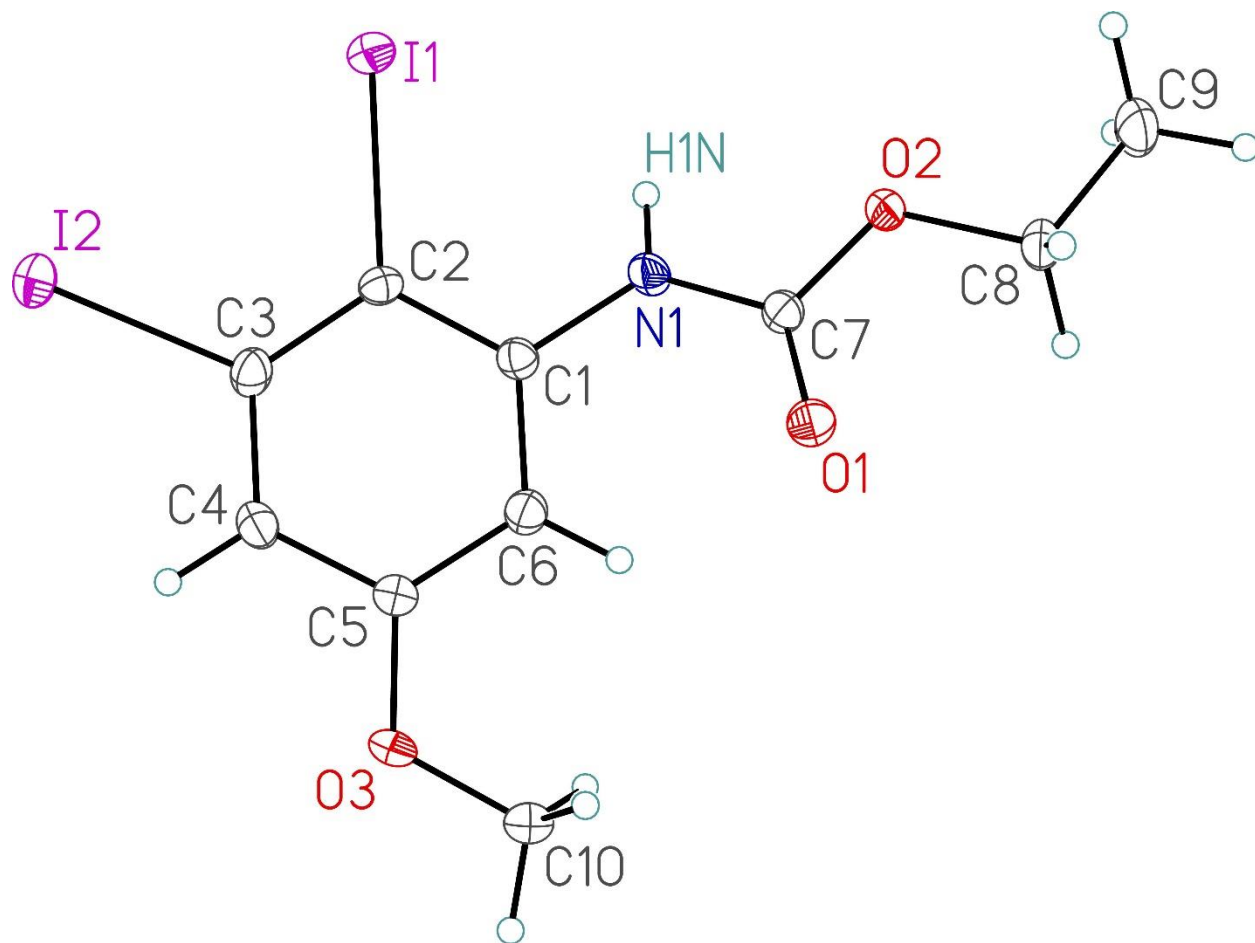

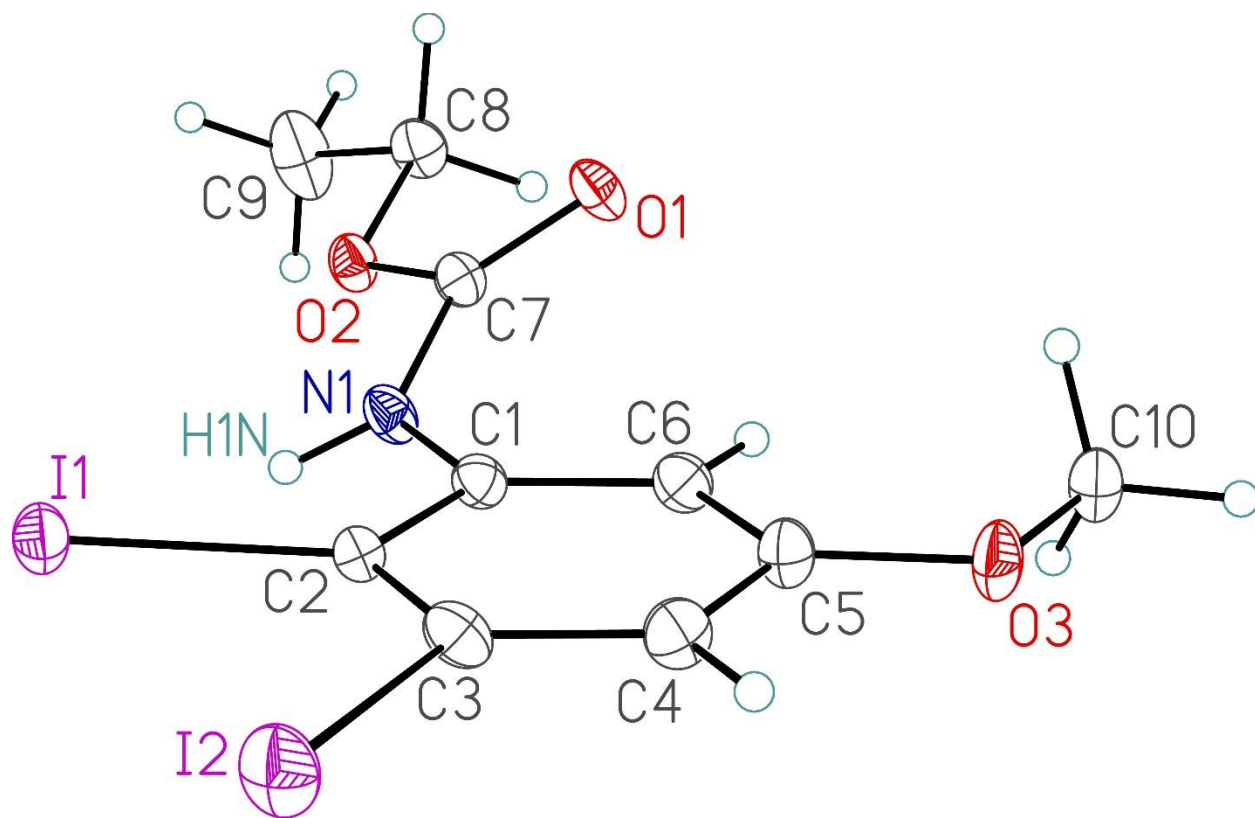

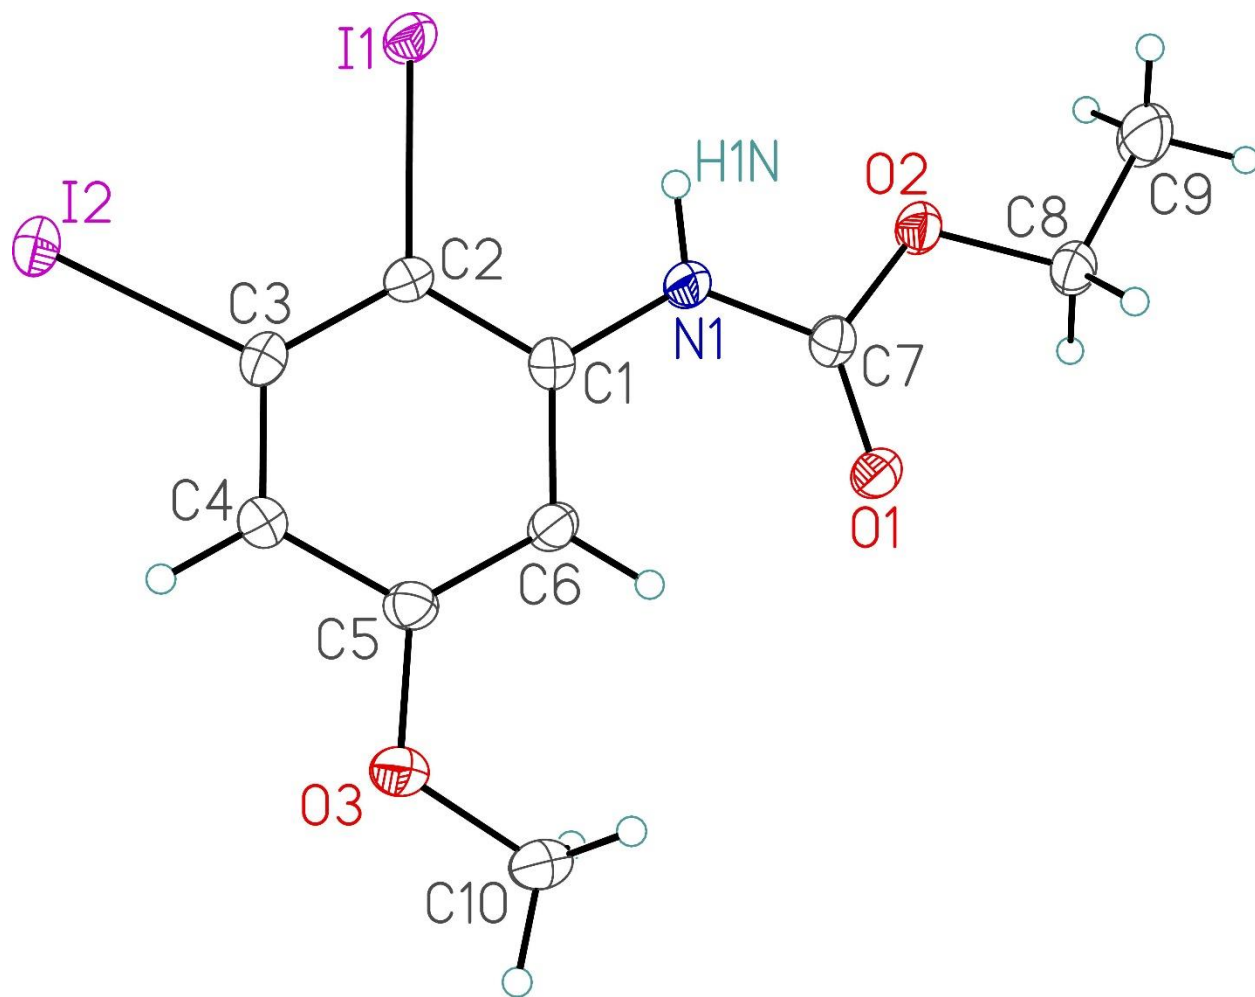

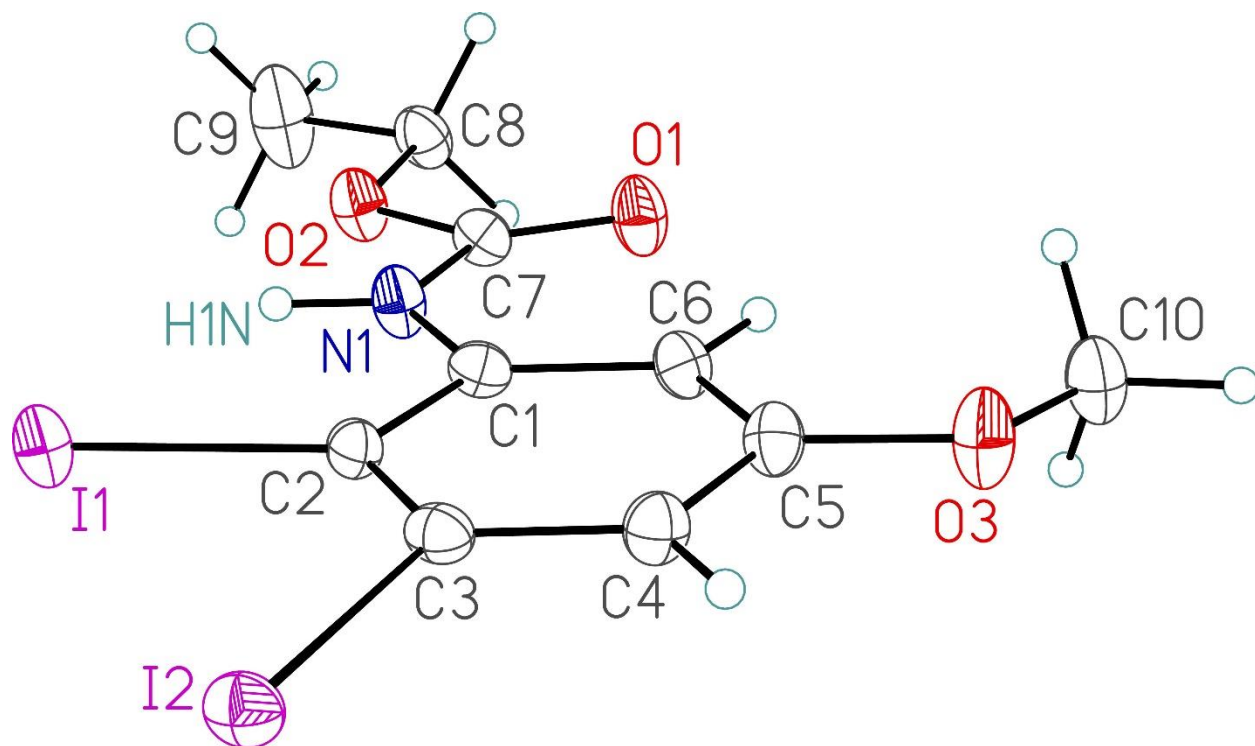

## List of Tables

- Table 1.** Crystallographic Experimental Details
- Table 2.** Atomic Coordinates and Equivalent Isotropic Displacement Parameters
- Table 3.** Selected Interatomic Distances
- Table 4.** Selected Interatomic Angles
- Table 5.** Torsional Angles
- Table 6.** Anisotropic Displacement Parameters
- Table 7.** Derived Atomic Coordinates and Displacement Parameters for Hydrogen Atoms

**Table 1.** Crystallographic Experimental Details**A. Crystal Data**

|                                             |                                                                |
|---------------------------------------------|----------------------------------------------------------------|
| formula                                     | C <sub>10</sub> H <sub>11</sub> I <sub>2</sub> NO <sub>3</sub> |
| formula weight                              | 447.00                                                         |
| crystal dimensions (mm)                     | 0.73 × 0.06 × 0.03                                             |
| crystal system                              | triclinic                                                      |
| space group                                 | <i>P</i> $\bar{1}$ (No. 2)                                     |
| unit cell parameters <sup>a</sup>           |                                                                |
| <i>a</i> (Å)                                | 4.7279 (3)                                                     |
| <i>b</i> (Å)                                | 14.6599 (10)                                                   |
| <i>c</i> (Å)                                | 19.2246 (13)                                                   |
| $\alpha$ (deg)                              | 102.2361 (8)                                                   |
| $\beta$ (deg)                               | 95.5377 (8)                                                    |
| $\gamma$ (deg)                              | 92.5611 (9)                                                    |
| <i>V</i> (Å <sup>3</sup> )                  | 1293.21 (15)                                                   |
| <i>Z</i>                                    | 4                                                              |
| $\rho_{\text{calcd}}$ (g cm <sup>-3</sup> ) | 2.296                                                          |
| $\mu$ (mm <sup>-1</sup> )                   | 4.856                                                          |

**B. Data Collection and Refinement Conditions**

|                                                       |                                                                            |
|-------------------------------------------------------|----------------------------------------------------------------------------|
| diffractometer                                        | Bruker D8/APEX II CCD <sup>b</sup>                                         |
| radiation ( $\lambda$ [Å])                            | graphite-monochromated Mo K $\alpha$ (0.71073)                             |
| temperature (°C)                                      | -100                                                                       |
| scan type                                             | $\omega$ scans (0.3°) (15 s exposures)                                     |
| data collection $2\theta$ limit (deg)                 | 56.86                                                                      |
| total data collected                                  | 11890 ( $-6 \leq h \leq 6$ , $-19 \leq k \leq 19$ , $-25 \leq l \leq 25$ ) |
| independent reflections                               | 6233 ( $R_{\text{int}} = 0.0181$ )                                         |
| number of observed reflections ( <i>NO</i> )          | 5308 [ $F_o^2 \geq 2\sigma(F_o^2)$ ]                                       |
| structure solution method                             | Patterson/structure expansion ( <i>DIRDIF-2008</i> <sup>c</sup> )          |
| refinement method                                     | full-matrix least-squares on $F^2$ ( <i>SHELXL-2014</i> <sup>d</sup> )     |
| absorption correction method                          | Gaussian integration (face-indexed)                                        |
| range of transmission factors                         | 0.9049–0.2738                                                              |
| data/restraints/parameters                            | 6233 / 0 / 289                                                             |
| goodness-of-fit ( <i>S</i> ) <sup>e</sup> [all data]  | 1.060                                                                      |
| final <i>R</i> indices <sup>f</sup>                   |                                                                            |
| <i>R</i> <sub>1</sub> [ $F_o^2 \geq 2\sigma(F_o^2)$ ] | 0.0272                                                                     |
| <i>wR</i> <sub>2</sub> [all data]                     | 0.0665                                                                     |
| largest difference peak and hole                      | 0.872 and -0.617 e Å <sup>-3</sup>                                         |

<sup>a</sup>Obtained from least-squares refinement of 8313 reflections with  $4.36^\circ < 2\theta < 56.18^\circ$ .

(continued)





**Table 1.** Crystallographic Experimental Details (continued)

<sup>b</sup>Programs for diffractometer operation, data collection, data reduction and absorption correction were those supplied by Bruker.

<sup>c</sup>Beurskens, P. T.; Beurskens, G.; de Gelder, R.; Smits, J. M. M.; Garcia-Granda, S.; Gould, R. O. (2008). The *DIRDIF-2008* program system. Crystallography Laboratory, Radboud University Nijmegen, The Netherlands.

<sup>d</sup>Sheldrick, G. M. *Acta Crystallogr.* **2015**, *C71*, 3–8.

<sup>e</sup> $S = [\sum w(F_o^2 - F_c^2)^2 / (n - p)]^{1/2}$  ( $n$  = number of data;  $p$  = number of parameters varied;  $w = [\sigma^2(F_o^2) + (0.0289P)^2 + 1.1161P]^{-1}$  where  $P = [\text{Max}(F_o^2, 0) + 2F_c^2]/3$ ).

<sup>f</sup> $R_1 = \sum ||F_o| - |F_c|| / \sum |F_o|$ ;  $wR_2 = [\sum w(F_o^2 - F_c^2)^2 / \sum w(F_o^4)]^{1/2}$ .

**Table 2.** Atomic Coordinates and Equivalent Isotropic Displacement Parameters*(a) Molecule A*

| Atom | <i>x</i>   | <i>y</i>    | <i>z</i>    | $U_{eq}, \text{\AA}^2$ |
|------|------------|-------------|-------------|------------------------|
| I1   | 0.53912(5) | 0.12949(2)  | 0.57118(2)  | 0.03236(7)*            |
| I2   | 0.44327(6) | 0.35142(2)  | 0.69200(2)  | 0.04231(8)*            |
| O1   | -0.2919(5) | 0.09634(17) | 0.36437(13) | 0.0323(5)*             |
| O2   | 0.0619(5)  | 0.00146(16) | 0.33413(12) | 0.0280(5)*             |
| O3   | -0.2792(5) | 0.42087(17) | 0.48486(13) | 0.0347(6)*             |
| N1   | 0.1614(6)  | 0.1247(2)   | 0.42307(15) | 0.0276(6)*             |
| C1   | 0.1228(6)  | 0.2091(2)   | 0.47219(17) | 0.0245(6)*             |
| C2   | 0.2758(6)  | 0.2281(2)   | 0.54024(17) | 0.0245(6)*             |
| C3   | 0.2363(7)  | 0.3127(3)   | 0.58741(18) | 0.0302(7)*             |
| C4   | 0.0500(7)  | 0.3749(2)   | 0.56829(18) | 0.0313(7)*             |
| C5   | -0.1009(7) | 0.3545(2)   | 0.50035(18) | 0.0298(7)*             |
| C6   | -0.0621(7) | 0.2721(2)   | 0.45164(18) | 0.0283(7)*             |
| C7   | -0.0468(6) | 0.0767(2)   | 0.37323(17) | 0.0248(6)*             |
| C8   | -0.1323(7) | -0.0504(3)  | 0.27465(18) | 0.0334(8)*             |
| C9   | 0.0226(10) | -0.1279(3)  | 0.2350(2)   | 0.0577(13)*            |
| C10  | -0.4380(8) | 0.4027(3)   | 0.41750(19) | 0.0346(8)*             |

*(b) Molecule B*

| Atom | <i>x</i>   | <i>y</i>    | <i>z</i>     | $U_{eq}, \text{\AA}^2$ |
|------|------------|-------------|--------------|------------------------|
| I1   | 1.10616(5) | 0.39252(2)  | 0.25632(2)   | 0.03874(7)*            |
| I2   | 1.35192(5) | 0.15891(2)  | 0.23177(2)   | 0.03606(7)*            |
| O1   | 0.3171(6)  | 0.39057(19) | 0.02905(14)  | 0.0429(6)*             |
| O2   | 0.3920(6)  | 0.51727(18) | 0.12029(13)  | 0.0400(6)*             |
| O3   | 0.7127(6)  | 0.0844(2)   | -0.01808(15) | 0.0481(7)*             |
| N1   | 0.6481(6)  | 0.3967(2)   | 0.12614(16)  | 0.0348(7)*             |
| C1   | 0.7574(7)  | 0.3090(2)   | 0.11395(18)  | 0.0287(7)*             |
| C2   | 0.9634(7)  | 0.2888(2)   | 0.16493(17)  | 0.0274(7)*             |
| C3   | 1.0734(7)  | 0.2001(3)   | 0.15385(18)  | 0.0298(7)*             |
| C4   | 0.9868(7)  | 0.1334(3)   | 0.09263(19)  | 0.0329(7)*             |
| C5   | 0.7835(7)  | 0.1547(3)   | 0.04166(19)  | 0.0331(7)*             |
| C6   | 0.6687(7)  | 0.2408(3)   | 0.05189(18)  | 0.0319(7)*             |
| C7   | 0.4398(7)  | 0.4308(3)   | 0.08610(18)  | 0.0309(7)*             |
| C8   | 0.1818(9)  | 0.5648(3)   | 0.0829(2)    | 0.0403(9)*             |
| C9   | 0.1530(13) | 0.6587(3)   | 0.1289(3)    | 0.0745(17)*            |
| C10  | 0.4825(9)  | 0.0965(3)   | -0.0676(2)   | 0.0469(10)*            |

Anisotropically-refined atoms are marked with an asterisk (\*). The form of the anisotropic displacement parameter is:  $\exp[-2\pi^2(h^2a^{*2}U_{11} + k^2b^{*2}U_{22} + l^2c^{*2}U_{33} + 2klb^{*}c^{*}U_{23}$

$$+ 2hla*c*U_{13} + 2hka*b*U_{12}).$$

**Table 3.** Selected Interatomic Distances (Å)

| <i>(a) Molecule A</i> |       |          | <i>(b) Molecule B</i> |       |          |
|-----------------------|-------|----------|-----------------------|-------|----------|
| Atom1                 | Atom2 | Distance | Atom1                 | Atom2 | Distance |
| I1                    | C2    | 2.092(3) | I1                    | C2    | 2.098(3) |
| I2                    | C3    | 2.100(3) | I2                    | C3    | 2.102(3) |
| O1                    | C7    | 1.212(4) | O1                    | C7    | 1.208(4) |
| O2                    | C7    | 1.349(4) | O2                    | C7    | 1.339(4) |
| O2                    | C8    | 1.448(4) | O2                    | C8    | 1.458(4) |
| O3                    | C5    | 1.376(4) | O3                    | C5    | 1.374(4) |
| O3                    | C10   | 1.400(4) | O3                    | C10   | 1.418(5) |
| N1                    | C1    | 1.419(4) | N1                    | C1    | 1.389(4) |
| N1                    | C7    | 1.361(4) | N1                    | C7    | 1.368(4) |
| C1                    | C2    | 1.399(4) | C1                    | C2    | 1.400(5) |
| C1                    | C6    | 1.391(4) | C1                    | C6    | 1.400(5) |
| C2                    | C3    | 1.404(5) | C2                    | C3    | 1.404(5) |
| C3                    | C4    | 1.377(5) | C3                    | C4    | 1.376(5) |
| C4                    | C5    | 1.393(5) | C4                    | C5    | 1.399(5) |
| C5                    | C6    | 1.395(5) | C5                    | C6    | 1.379(5) |
| C8                    | C9    | 1.491(5) | C8                    | C9    | 1.489(6) |

**Table 4.** Selected Interatomic Angles (deg)

| <i>(a) Molecule A</i> |       |       |          | <i>(b) Molecule B</i> |       |       |          |
|-----------------------|-------|-------|----------|-----------------------|-------|-------|----------|
| Atom1                 | Atom2 | Atom3 | Angle    | Atom1                 | Atom2 | Atom3 | Angle    |
| C7                    | O2    | C8    | 114.2(2) | C7                    | O2    | C8    | 115.6(3) |
| C5                    | O3    | C10   | 118.0(3) | C5                    | O3    | C10   | 117.9(3) |
| C1                    | N1    | C7    | 124.1(3) | C1                    | N1    | C7    | 129.4(3) |
| N1                    | C1    | C2    | 119.2(3) | N1                    | C1    | C2    | 119.0(3) |
| N1                    | C1    | C6    | 119.6(3) | N1                    | C1    | C6    | 121.7(3) |
| C2                    | C1    | C6    | 121.1(3) | C2                    | C1    | C6    | 119.3(3) |
| I1                    | C2    | C1    | 120.2(2) | I1                    | C2    | C1    | 119.3(2) |
| I1                    | C2    | C3    | 121.7(2) | I1                    | C2    | C3    | 121.0(2) |
| C1                    | C2    | C3    | 118.0(3) | C1                    | C2    | C3    | 119.7(3) |
| I2                    | C3    | C2    | 123.1(2) | I2                    | C3    | C2    | 122.4(2) |
| I2                    | C3    | C4    | 115.4(2) | I2                    | C3    | C4    | 116.6(3) |
| C2                    | C3    | C4    | 121.5(3) | C2                    | C3    | C4    | 120.9(3) |
| C3                    | C4    | C5    | 119.6(3) | C3                    | C4    | C5    | 119.0(3) |
| O3                    | C5    | C4    | 116.1(3) | O3                    | C5    | C4    | 114.9(3) |
| O3                    | C5    | C6    | 123.5(3) | O3                    | C5    | C6    | 123.8(3) |
| C4                    | C5    | C6    | 120.4(3) | C4                    | C5    | C6    | 121.3(3) |
| C1                    | C6    | C5    | 119.4(3) | C1                    | C6    | C5    | 119.9(3) |
| O1                    | C7    | O2    | 124.2(3) | O1                    | C7    | O2    | 124.7(3) |
| O1                    | C7    | N1    | 126.8(3) | O1                    | C7    | N1    | 126.4(3) |
| O2                    | C7    | N1    | 109.0(3) | O2                    | C7    | N1    | 108.9(3) |
| O2                    | C8    | C9    | 107.7(3) | O2                    | C8    | C9    | 108.2(3) |

**Table 5.** Torsional Angles (deg)

| <i>(a) Molecule A</i> |       |       |       |           | <i>(b) Molecule B</i> |       |       |       |           |
|-----------------------|-------|-------|-------|-----------|-----------------------|-------|-------|-------|-----------|
| Atom1                 | Atom2 | Atom3 | Atom4 | Angle     | Atom1                 | Atom2 | Atom3 | Atom4 | Angle     |
| C8                    | O2    | C7    | O1    | 6.0(4)    | C8                    | O2    | C7    | O1    | -2.1(5)   |
| C8                    | O2    | C7    | N1    | -174.3(3) | C8                    | O2    | C7    | N1    | 177.7(3)  |
| C7                    | O2    | C8    | C9    | 177.3(3)  | C7                    | O2    | C8    | C9    | 179.1(4)  |
| C10                   | O3    | C5    | C4    | -179.2(3) | C10                   | O3    | C5    | C4    | 172.1(3)  |
| C10                   | O3    | C5    | C6    | 2.6(5)    | C10                   | O3    | C5    | C6    | -8.5(6)   |
| C7                    | N1    | C1    | C2    | 147.7(3)  | C7                    | N1    | C1    | C2    | -177.0(3) |
| C7                    | N1    | C1    | C6    | -33.4(5)  | C7                    | N1    | C1    | C6    | 3.5(6)    |
| C1                    | N1    | C7    | O1    | -2.0(5)   | C1                    | N1    | C7    | O1    | -3.6(6)   |
| C1                    | N1    | C7    | O2    | 178.3(3)  | C1                    | N1    | C7    | O2    | 176.5(3)  |
| N1                    | C1    | C2    | I1    | -3.7(4)   | N1                    | C1    | C2    | I1    | -1.5(4)   |
| N1                    | C1    | C2    | C3    | 179.2(3)  | N1                    | C1    | C2    | C3    | 179.2(3)  |
| C6                    | C1    | C2    | I1    | 177.4(2)  | C6                    | C1    | C2    | I1    | 178.0(2)  |
| C6                    | C1    | C2    | C3    | 0.2(5)    | C6                    | C1    | C2    | C3    | -1.3(5)   |
| N1                    | C1    | C6    | C5    | 179.5(3)  | N1                    | C1    | C6    | C5    | 179.7(3)  |
| C2                    | C1    | C6    | C5    | -1.6(5)   | C2                    | C1    | C6    | C5    | 0.2(5)    |
| I1                    | C2    | C3    | I2    | 1.9(4)    | I1                    | C2    | C3    | I2    | 6.9(4)    |
| I1                    | C2    | C3    | C4    | -176.1(3) | I1                    | C2    | C3    | C4    | -177.6(3) |
| C1                    | C2    | C3    | I2    | 179.0(2)  | C1                    | C2    | C3    | I2    | -173.8(2) |
| C1                    | C2    | C3    | C4    | 1.0(5)    | C1                    | C2    | C3    | C4    | 1.7(5)    |
| I2                    | C3    | C4    | C5    | -178.9(3) | I2                    | C3    | C4    | C5    | 174.8(3)  |
| C2                    | C3    | C4    | C5    | -0.8(5)   | C2                    | C3    | C4    | C5    | -0.9(5)   |
| C3                    | C4    | C5    | O3    | -178.9(3) | C3                    | C4    | C5    | O3    | 179.2(3)  |
| C3                    | C4    | C5    | C6    | -0.6(5)   | C3                    | C4    | C5    | C6    | -0.2(5)   |
| O3                    | C5    | C6    | C1    | 180.0(3)  | O3                    | C5    | C6    | C1    | -178.8(3) |
| C4                    | C5    | C6    | C1    | 1.8(5)    | C4                    | C5    | C6    | C1    | 0.6(5)    |

**Table 6.** Anisotropic Displacement Parameters ( $U_{ij}$ , Å<sup>2</sup>)*(a) Molecule A*

| Atom | $U_{11}$    | $U_{22}$    | $U_{33}$    | $U_{23}$     | $U_{13}$     | $U_{12}$    |
|------|-------------|-------------|-------------|--------------|--------------|-------------|
| I1   | 0.03298(12) | 0.03113(13) | 0.03262(12) | 0.00822(9)   | -0.00309(9)  | 0.00664(9)  |
| I2   | 0.04820(15) | 0.04178(15) | 0.03004(13) | -0.00189(10) | -0.00965(10) | 0.00530(11) |
| O1   | 0.0196(11)  | 0.0366(14)  | 0.0372(13)  | 0.0003(11)   | -0.0001(9)   | 0.0063(10)  |
| O2   | 0.0267(11)  | 0.0252(12)  | 0.0286(12)  | -0.0005(9)   | -0.0029(9)   | 0.0058(9)   |
| O3   | 0.0392(13)  | 0.0256(13)  | 0.0378(14)  | 0.0026(10)   | -0.0004(11)  | 0.0154(11)  |
| N1   | 0.0204(12)  | 0.0283(15)  | 0.0310(14)  | -0.0010(12)  | 0.0023(11)   | 0.0065(11)  |
| C1   | 0.0220(14)  | 0.0253(16)  | 0.0258(15)  | 0.0040(13)   | 0.0037(12)   | 0.0025(12)  |
| C2   | 0.0208(14)  | 0.0254(16)  | 0.0278(16)  | 0.0083(13)   | 0.0002(12)   | 0.0021(12)  |
| C3   | 0.0245(15)  | 0.0367(19)  | 0.0261(16)  | 0.0016(14)   | -0.0009(13)  | 0.0007(14)  |
| C4   | 0.0339(17)  | 0.0276(18)  | 0.0294(17)  | -0.0006(14)  | 0.0031(14)   | 0.0041(14)  |
| C5   | 0.0309(17)  | 0.0285(18)  | 0.0295(17)  | 0.0047(14)   | 0.0013(13)   | 0.0078(14)  |
| C6   | 0.0272(16)  | 0.0305(18)  | 0.0264(16)  | 0.0046(13)   | 0.0017(13)   | 0.0017(13)  |
| C7   | 0.0236(15)  | 0.0278(17)  | 0.0227(15)  | 0.0035(13)   | 0.0042(12)   | 0.0044(13)  |
| C8   | 0.0334(18)  | 0.0321(19)  | 0.0293(17)  | -0.0022(14)  | -0.0034(14)  | 0.0016(15)  |
| C9   | 0.058(3)    | 0.050(3)    | 0.048(3)    | -0.021(2)    | -0.016(2)    | 0.022(2)    |
| C10  | 0.0366(19)  | 0.0318(19)  | 0.0356(19)  | 0.0078(15)   | 0.0001(15)   | 0.0111(15)  |

*(b) Molecule B*

| Atom | $U_{11}$    | $U_{22}$    | $U_{33}$    | $U_{23}$    | $U_{13}$     | $U_{12}$    |
|------|-------------|-------------|-------------|-------------|--------------|-------------|
| I1   | 0.04131(14) | 0.04106(15) | 0.02931(12) | 0.00028(10) | -0.00483(10) | 0.00784(11) |
| I2   | 0.03280(12) | 0.03950(14) | 0.03841(13) | 0.01488(11) | 0.00004(9)   | 0.00719(10) |
| O1   | 0.0486(15)  | 0.0396(15)  | 0.0349(14)  | 0.0001(12)  | -0.0100(12)  | 0.0134(12)  |
| O2   | 0.0493(15)  | 0.0352(14)  | 0.0331(13)  | 0.0038(11)  | -0.0046(11)  | 0.0146(12)  |
| O3   | 0.0521(17)  | 0.0392(16)  | 0.0433(16)  | -0.0074(12) | -0.0103(13)  | 0.0120(13)  |
| N1   | 0.0410(16)  | 0.0317(16)  | 0.0282(15)  | 0.0011(12)  | -0.0051(12)  | 0.0089(13)  |
| C1   | 0.0289(16)  | 0.0305(18)  | 0.0287(17)  | 0.0091(14)  | 0.0063(13)   | 0.0049(14)  |
| C2   | 0.0257(15)  | 0.0301(18)  | 0.0253(16)  | 0.0051(13)  | 0.0010(12)   | -0.0011(13) |
| C3   | 0.0257(16)  | 0.0361(19)  | 0.0301(17)  | 0.0133(15)  | 0.0019(13)   | 0.0021(14)  |
| C4   | 0.0337(18)  | 0.0293(18)  | 0.0345(18)  | 0.0049(15)  | 0.0014(14)   | 0.0049(14)  |
| C5   | 0.0305(17)  | 0.0336(19)  | 0.0320(18)  | 0.0000(15)  | 0.0025(14)   | 0.0036(14)  |
| C6   | 0.0311(17)  | 0.0361(19)  | 0.0268(16)  | 0.0047(14)  | -0.0009(13)  | 0.0040(14)  |
| C7   | 0.0304(17)  | 0.0336(19)  | 0.0299(17)  | 0.0084(15)  | 0.0038(14)   | 0.0057(14)  |
| C8   | 0.052(2)    | 0.038(2)    | 0.0312(19)  | 0.0098(16)  | -0.0006(16)  | 0.0100(18)  |
| C9   | 0.104(4)    | 0.050(3)    | 0.058(3)    | -0.004(2)   | -0.026(3)    | 0.037(3)    |
| C10  | 0.052(2)    | 0.046(2)    | 0.036(2)    | -0.0021(18) | -0.0065(18)  | 0.0037(19)  |

The form of the anisotropic displacement parameter is:

$$\exp[-2\pi^2(h^2a^*{}^2U_{11} + k^2b^*{}^2U_{22} + l^2c^*{}^2U_{33} + 2klb^*c^*U_{23} + 2hla^*c^*U_{13} + 2hka^*b^*U_{12})]$$

**Table 7.** Derived Atomic Coordinates and Displacement Parameters for Hydrogen Atoms

| Atom | <i>x</i>  | <i>y</i>  | <i>z</i>  | $U_{eq}, \text{\AA}^2$ |
|------|-----------|-----------|-----------|------------------------|
| H1NA | 0.330437  | 0.101959  | 0.424953  | 0.033                  |
| H4A  | 0.024492  | 0.431387  | 0.601218  | 0.038                  |
| H6A  | -0.161099 | 0.259045  | 0.404849  | 0.034                  |
| H8A  | -0.196534 | -0.008898 | 0.242665  | 0.040                  |
| H8B  | -0.301585 | -0.076151 | 0.292416  | 0.040                  |
| H9A  | -0.104193 | -0.164274 | 0.194286  | 0.069                  |
| H9B  | 0.189310  | -0.101629 | 0.217515  | 0.069                  |
| H9C  | 0.084669  | -0.168621 | 0.267072  | 0.069                  |
| H10A | -0.554847 | 0.455358  | 0.413676  | 0.041                  |
| H10B | -0.308535 | 0.394547  | 0.380119  | 0.041                  |
| H10C | -0.561748 | 0.345555  | 0.411556  | 0.041                  |
| H1NB | 0.723868  | 0.436108  | 0.165334  | 0.042                  |
| H4B  | 1.063896  | 0.073778  | 0.085092  | 0.039                  |
| H6B  | 0.529541  | 0.253741  | 0.016853  | 0.038                  |
| H8C  | -0.003805 | 0.527964  | 0.073510  | 0.048                  |
| H8D  | 0.244254  | 0.571566  | 0.036449  | 0.048                  |
| H9D  | 0.012327  | 0.691805  | 0.104635  | 0.089                  |
| H9E  | 0.090168  | 0.651255  | 0.174603  | 0.089                  |
| H9F  | 0.337363  | 0.694705  | 0.137670  | 0.089                  |
| H10D | 0.454851  | 0.041595  | -0.107371 | 0.056                  |
| H10E | 0.308633  | 0.103802  | -0.043541 | 0.056                  |
| H10F | 0.524755  | 0.152433  | -0.085998 | 0.056                  |
